# Supplementary material for: Construction of axial chirality by asymmetric alpha C–H alkenylation of aryl alkenes
Source: Royal Society of Chemistry journal article supplement (doi:10.1039/d2qo00803c), 2022-01-01
Supplement: d2qo00803c1.pdf [file d2qo00803c1.pdf]

## Supporting Information

For the article entitled

# Access toward axially chirality by asymmetric $\alpha$ -C-H alkenylations of aryl alkenes

Cong Shen, Yuhang Zhu, Wenzhou Shen, Shuqi Jin, Liangjun Zhong,\* Lixia Xu, Shuxin

Luo, Guofu Zhong,\* and Jian Zhang\*

## Table of Contents

|                                                                                                                            |    |
|----------------------------------------------------------------------------------------------------------------------------|----|
| 1. General Methods .....                                                                                                   | 2  |
| 2. General Procedure for Substrate Synthesis .....                                                                         | 3  |
| 2.1 General Procedure A for Substrate Synthesis.....                                                                       | 3  |
| 2.2 General Procedure B for Substrate Synthesis .....                                                                      | 9  |
| 3. General Procedure for Atroposelective $\alpha$ -C-H Alkenylation.....                                                   | 12 |
| 4. Gram-scaled preparation .....                                                                                           | 30 |
| 5. Further Elaboration.....                                                                                                | 31 |
| 5.1 General procedure for the preparation of axial Chiral Carboxylic Acids 4 (CCAs) ..                                     | 31 |
| 5.2 Application of 4 as CCA for Co <sup>III</sup> -catalyzed enantioselective 1, 4-addition of indole and maleimides ..... | 36 |
| 6. Density Functional Theory (DFT) Calculations .....                                                                      | 37 |
| 6.1 Computational Details and Rotational Barrier Calculated by DFT.....                                                    | 37 |
| 6.2 Enantiomeric conversion half-life calculation strategy.....                                                            | 38 |
| 7. References .....                                                                                                        | 7  |
| 8. NMR Charts .....                                                                                                        | 9  |
| 8.1 <sup>1</sup> H / <sup>13</sup> C NMR Charts of The Substrates.....                                                     | 9  |
| 8.2 <sup>1</sup> H / <sup>13</sup> C NMR Charts of The Products .....                                                      | 21 |
| 8.3 <sup>1</sup> H / <sup>13</sup> C NMR Charts of CCAs.....                                                               | 41 |
| 9. Copies of HPLC Analysis .....                                                                                           | 48 |
| 9.1 HPLC Analysis of Products.....                                                                                         | 48 |
| 9.2 HPLC Analysis of Products 7 with different CCAs .....                                                                  | 71 |
| 10. X-ray Crystallography.....                                                                                             | 74 |

## 1. General Methods

Analytical thin layer chromatography (TLC) was performed using Merck 60 F254 precoated silica gel plate (0.2 mm thickness). Subsequent to elution, plates were visualized using UV radiation (254 nm) on Spectroline Model ENF-24061/F 254 nm. Further visualization was possible by staining with basic solution of potassium permanganate or acidic solution of ceric molybdate. Flash column chromatography was performed using Merck aluminium oxide 90 active neutral with freshly distilled solvents. Columns were typically packed as slurry and equilibrated with the appropriate solvent system prior to use. Proton nuclear magnetic resonance spectra ( $^1\text{H}$  NMR) were recorded on Bruker AMX 400 spectrophotometer ( $\text{CDCl}_3$  as solvent), and Bruker AMX 500 spectrophotometer ( $\text{CDCl}_3$  as solvent). Chemical shifts for  $^1\text{H}$  NMR spectra are reported as  $\delta$  in units of parts per million (ppm) downfield from  $\text{SiMe}_4$  ( $\delta$  0.0) and relative to the signal of chloroform-*d* ( $\delta$  7.26, singlet). Multiplicities were given as: s (singlet), d (doublet), t (triplet), dd (doublets of doublet) or m (multiplets). The number of protons (n) for a given resonance is indicated by nH. Coupling constants are reported as a J value in Hz. Carbon nuclear magnetic resonance spectra ( $^{13}\text{C}$  NMR) are reported as  $\delta$  in units of parts per million (ppm) downfield from  $\text{SiMe}_4$  ( $\delta$  0.0) and relative to the signal of chloroform-*d* ( $\delta$  77.0, triplet). Mass spectrometry was performed by Waters Q-ToF Premier Micromass instrument, using Electro Spray Ionization (ESI) mode. IR spectra were recorded as thin films on KBr plates on a Bio-Rad FTS 165 FTIR spectrometer and are reported in frequency of absorption ( $\text{cm}^{-1}$ ). The enantiomeric excesses (ee) of the products were determined by chiral stationary phase HPLC with Chiralpak (AD-H, OD-H, IA-H, IC-H, IB-H). Optical rotations were measured with Rudolph Autopol IVT. The single crystal X-ray diffraction studies were carried out on a Bruker D8 Venture diffractometer.  $\text{Pd}(\text{OAc})_2$  were purchased from TCI and used directly. Other reagents, unless otherwise noted below, are commercially available from TCI, Energy Chemical, Alfa Aesar (China) Chemical Co. Ltd. and used without further purification.

## 2. General Procedure for Substrate Synthesis

### 2.1 General Procedure A for Substrate Synthesis

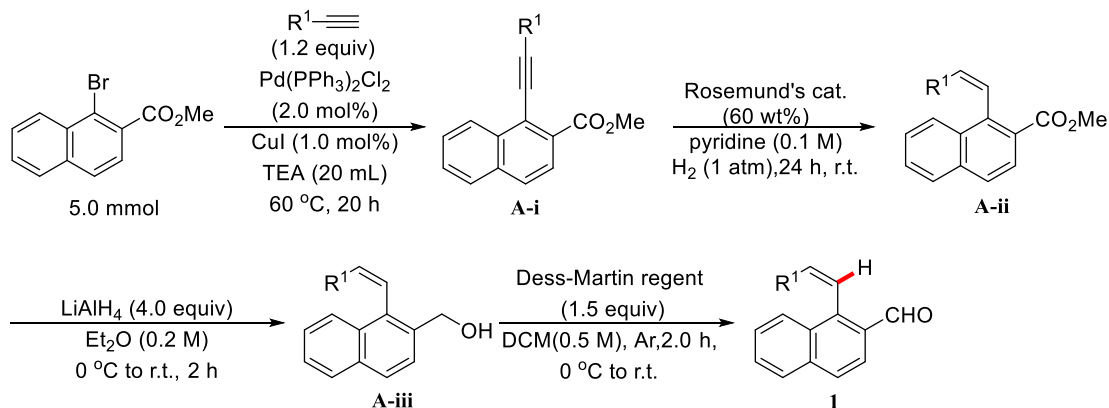

**Alkynylation Reaction:**<sup>1</sup> A solution of Pd(PPh<sub>3</sub>)<sub>2</sub>Cl<sub>2</sub> (1.0 mol%), CuI (1.0 mol%), methyl 2-bromobenzoate (5.0 mmol) and ethynylbenzene (6.0 mmol) in TEA (0.4 M) was stirred at 60 °C overnight, then cooled to rt and diluted with H<sub>2</sub>O (20 mL) followed by extraction with EtOAc (30 mL × 3). The solvent was removed in vacuo, and the crude product was purified by silica gel chromatography (SiO<sub>2</sub>, PE/EA) to obtain the corresponding product (A-i).

**Hydrogenation Reaction:** Following a slight modification from a previously reported procedure, a solution of alkyne (A-i) (3.9 mmol, 1.0 equiv) in pyridine (39 mL) was vacuum purged three times, backfilling with N<sub>2</sub>. Rosemund's catalyst (5% Pd on BaSO<sub>4</sub>) was added and the solution was vacuum purged once more, backfilling with H<sub>2</sub>. The solution was allowed to stir at room temperature for 4 h until reaction completion (monitored by TLC). The reaction was vacuum purged and backfilled with N<sub>2</sub>, upon which the reaction was filtered through Celite, rinsing with EtOAc (200 mL). The organic solution was concentrated in vacuo to give an orange oil, which was dissolved in 50 mL EtOAc. The organic solution was washed with HCl (2 M, 30 mL × 2), water (50 mL), and brine (50 mL). The organic layer was then dried with Na<sub>2</sub>SO<sub>4</sub> and concentrated in vacuo

to afford the crude olefin. Purification by column chromatography (PE/EA) afforded olefin (**A-ii**)

**General Procedure for Ester Reduction:**<sup>2</sup> To a solution of substituted ester (**A-ii**) in Et<sub>2</sub>O (0.2 M) was added dropwise LiAlH<sub>4</sub> (4.0 equiv) over 30 min at 0°C and stirred for 2 h at r.t., and 2 M HCl was added slowly until a clear solution was obtained. The Et<sub>2</sub>O layer was separated and the aqueous phase was extracted with Et<sub>2</sub>O (20 mL × 3). Combined the organic layers and dried over Na<sub>2</sub>SO<sub>4</sub>. After removing the solvent under reduced pressure, the residue was purified by column chromatography on silica gel with EtOAc and the resulting alcohol (**A-iii**) was used for the next step without further purification.

**General Procedure for Aldehyde Preparation:** To a solution of Dess-Martin reagent (1.5 equiv) in DCM (0.5 M) was added in dropwise substituted alcohol (**A-iii**) at 0°C and stirred for 2 h. The solvent was removed in vacuo, and the resulting residue was purified by silica gel column chromatography (PE / EA = 10 / 1) afforded aldehyde (**1**).

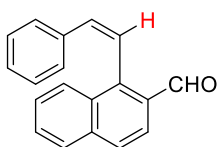

(**Z**)-1-styryl-2-naphthaldehyde (**1a**)

Following the general procedure A, **1a** was obtained as a light yellow solid (0.72 g, 56% yield for four steps, m.p. = 67.3 °C).

**<sup>1</sup>H NMR** (500 MHz, CDCl<sub>3</sub>)

δ 10.41 (s, 1H), 8.25 (d, *J* = 8.5 Hz, 1H), 7.95 (d, *J* = 8.5 Hz, 1H), 7.91 (d, *J* = 8.0 Hz, 1H), 7.88 (d, *J* = 8.5 Hz, 1H), 7.66 – 7.63 (m, 1H), 7.56 – 7.53 (m, 1H), 7.18 (d, *J* = 12.0 Hz, 1H), 7.08 – 7.01 (m, 4H), 6.88 – 6.86 (m, 2H).

**<sup>13</sup>C NMR** (125 MHz, CDCl<sub>3</sub>)

δ 191.38, 141.32, 135.20, 135.18, 134.32, 130.21, 128.84, 128.10, 127.96, 127.56, 127.39, 127.19, 126.85, 126.07, 125.35, 122.13, 121.55.

**HRMS (ESI)** for C<sub>19</sub>H<sub>14</sub>OK [M+ K]<sup>+</sup>: 297.0676, found: 297.0664.

**FTIR** (KBr, cm<sup>-1</sup>)

3417.41, 2959.61, 1680.32, 1653.25, 1630.84, 1406.24, 1386.22, 1269.10, 1030.55.

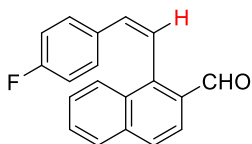

**(Z)-1-(4-fluorostyryl)-2-naphthaldehyde (1f)**

Following the procedure A, **1f** was obtained as a yellow solid (0.80 g, 58% yield for four steps, m.p. =115.2 °C).

**<sup>1</sup>H NMR** (500 MHz, CDCl<sub>3</sub>)

δ 10.39 (s, 1H), 8.21 (d, *J* = 8.4 Hz, 1H), 7.95 (d, *J* = 8.6 Hz, 1H), 7.89 (dd, *J* = 16.6, 8.4 Hz, 2H), 7.64 (ddd, *J* = 8.1, 6.9, 1.1 Hz, 1H), 7.54 (ddd, *J* = 8.2, 6.9, 1.2 Hz, 1H), 7.13 (d, *J* = 12.4 Hz, 1H), 7.05 (d, *J* = 12.4 Hz, 1H), 6.86 – 6.81 (m, 2H), 6.71 (t, *J* = 8.7 Hz, 2H).

**<sup>13</sup>C NMR** (125 MHz, CDCl<sub>3</sub>)

δ 191.25, 161.01 (d, *J*<sub>CF</sub> = 246.3 Hz), 140.94, 135.23, 133.95, 130.51 (d, *J*<sub>CF</sub> = 3.8 Hz), 130.11, 129.66 (d, *J*<sub>CF</sub> = 7.5 Hz), 128.90, 128.19, 127.63, 127.34, 126.17, 125.24, 121.95 (d, *J*<sub>CF</sub> = 2.5 Hz), 121.61, 114.45 (d, *J*<sub>CF</sub> = 21.3 Hz).

**<sup>19</sup>F NMR** (471 MHz, CDCl<sub>3</sub>)

δ-112.92

**HRMS (ESI)** for C<sub>19</sub>H<sub>13</sub>OFNa [M+ Na]<sup>+</sup>: 299.0843, found: 299.0829.

**FTIR** (KBr, cm<sup>-1</sup>)

3282.24, 3262.62, 2357.01, 1656.07, 1510.28, 1459.81.

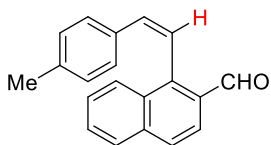

**(Z)-1-(4-methylstyryl)-2-naphthaldehyde (1g)**

Following the procedure A, **1g** was obtained as a yellow solid (0.85 g, 63% yield for four

steps, m.p. = 114.2 °C).

**<sup>1</sup>H NMR** (500 MHz, CDCl<sub>3</sub>)

δ 10.40 (s, 1H), 8.25 (d, *J* = 8.5 Hz, 1H), 7.95 (d, *J* = 8.5 Hz, 1H), 7.91 (d, *J* = 8.0 Hz, 1H), 7.87 (d, *J* = 8.5 Hz, 1H), 7.66 – 7.63 (m, 1H), 7.56 – 7.53 (m, 1H), 7.14 (d, *J* = 12.5 Hz, 1H), 7.00 (d, *J* = 12.5 Hz, 1H), 6.84 (d, *J* = 8.0 Hz, 2H), 6.76 (d, *J* = 8.0 Hz, 2H), 2.17 (s, 3H).

**<sup>13</sup>C NMR** (125 MHz, CDCl<sub>3</sub>)

δ 191.57, 141.67, 136.79, 135.22, 135.07, 131.50, 130.28, 128.82, 128.12, 128.07, 127.92, 127.53, 127.09, 126.03, 125.40, 121.52, 121.06, 20.09.

**HRMS (ESI)** for C<sub>20</sub>H<sub>16</sub>ONa [M+ Na]<sup>+</sup>: 295.1093, found: 295.1084.

**FTIR** (KBr, cm<sup>-1</sup>)

3287.85, 3226.17, 2354.21, 1653.27, 1636.45, 1504.67, 1454.21.

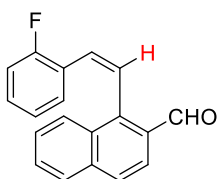

**(Z)-1-(2-fluorostyryl)-2-naphthaldehyde (1h)**

Following the procedure A, **1h** was obtained as a yellow solid (1.10 g, 80% yield for four steps, m.p. = 87.2 °C).

**<sup>1</sup>H NMR** (500 MHz, CDCl<sub>3</sub>)

δ 10.38 (s, 1H), 8.22 (d, *J* = 8.5 Hz, 1H), 7.92 (d, *J* = 8.5 Hz, 1H), 7.90 (d, *J* = 8.0 Hz, 1H), 7.85 (d, *J* = 8.5 Hz, 1H), 7.66 – 7.62 (m, 1H), 7.57 – 7.54 (m, 1H), 7.37 (d, *J* = 12.5 Hz, 1H), 7.21 (d, *J* = 12.5 Hz, 1H), 7.06 – 7.02 (m, 1H), 6.97 – 6.93 (m, 1H), 6.60 – 6.57 (m, 1H), 6.50 (td, *J* = 8.0, 2.0 Hz, 1H).

<sup>1</sup>H NMR (500 MHz, Chloroform-*d*)

δ 10.37 (s, 1H), 8.21 (d, *J* = 8.3 Hz, 1H), 7.92 (d, *J* = 8.6 Hz, 1H), 7.89 (d, *J* = 8.1 Hz, 1H), 7.84 (d, *J* = 8.6 Hz, 1H), 7.63 (ddd, *J* = 8.1, 6.9, 1.1

Hz, 1H), 7.55 (ddd,  $J = 8.2, 6.9, 1.3$  Hz, 1H), 7.36 (d,  $J = 12.3$  Hz, 1H), 7.20 (d,  $J = 12.4$  Hz, 1H), 7.06 – 7.01 (m, 1H), 6.97 – 6.91 (m, 1H), 6.58 (t,  $J = 8.0$  Hz, 1H), 6.49 (td,  $J = 7.7, 1.6$  Hz, 1H).

**<sup>13</sup>C NMR** (125 MHz, CDCl<sub>3</sub>)

$\delta$  191.08, 159.48(d,  $J_{CF} = 247.5$  Hz), 140.55, 135.08, 130.15, 128.98, 128.60 (d,  $J_{CF} = 8.8$ Hz), 128.41 (d,  $J_{CF} = 2.5$ Hz), 128.08, 127.64 (d,  $J_{CF} = 6.3$ Hz), 127.45, 127.33, 126.14, 125.17, 124.11 (d,  $J_{CF} = 1.3$ Hz), 122.70 (d,  $J_{CF} = 3.8$ Hz), 122.22, 122.12, 121.56, 114.60 (d,  $J_{CF} = 21.3$ Hz).

**<sup>19</sup>F NMR** (471 MHz, CDCl<sub>3</sub>)

$\delta$  -115.97.

**HRMS (ESI)** for C<sub>19</sub>H<sub>13</sub>OFNa [M+ Na]<sup>+</sup>: 299.0843, found: 299.0832.

**FTIR** (KBr, cm<sup>-1</sup>)

3170.09, 2351.40, 1681.31, 1647.66, 1454.21.

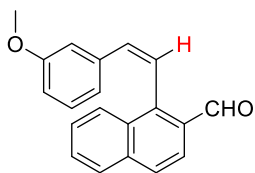

**(Z)-1-(3-methoxystyryl)-2-naphthaldehyde (1i)**

Following the procedure A, **1i** was obtained as a yellow oil (1.28 g, 89% yield for four steps).

**<sup>1</sup>H NMR** (500 MHz, CDCl<sub>3</sub>)

$\delta$  10.42 (s, 1H), 8.23 (d,  $J = 8.4$  Hz, 1H), 7.96 (d,  $J = 8.6$  Hz, 1H), 7.87 (dd,  $J = 16.1, 8.5$  Hz, 2H), 7.65 – 7.61 (m, 1H), 7.53 (ddd,  $J = 8.2, 6.9, 1.2$  Hz, 1H), 7.13 (d,  $J = 12.4$  Hz, 1H), 7.06 (d,  $J = 12.4$  Hz, 1H), 6.96 (t,  $J = 8.0$  Hz, 1H), 6.60 (dd,  $J = 8.2, 2.5$  Hz, 1H), 6.51 (d,  $J = 7.7$  Hz, 1H), 6.36 – 6.32 (m, 1H), 3.32 (s, 3H).

**<sup>13</sup>C NMR** (125 MHz, CDCl<sub>3</sub>)

$\delta$  191.30, 158.22, 141.40, 135.57, 135.14, 135.01, 130.18, 128.95, 128.35, 128.12, 127.49, 127.15, 126.12, 125.39, 122.34, 121.48, 120.74, 113.21, 112.54, 53.63.

**HRMS (ESI)** for  $C_{20}H_{16}O_2Na$   $[M+Na]^+$ : 311.1043, found: 311.1038.

**FTIR** (KBr,  $cm^{-1}$ )

3242.99, 2354.21, 1650.47, 1636.45, 1499.07.

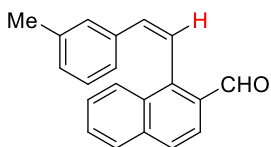

**(Z)-1-(3-methylstyryl)-2-naphthaldehyde (1j)**

Following the procedure A, **1j** was obtained as a yellow solid (1.07 g, 79% yield for four steps, m.p. = 70.6 °C).

**<sup>1</sup>H NMR** (500 MHz,  $CDCl_3$ )

$\delta$  10.39 (s, 1H), 8.23 (d,  $J = 8.4$  Hz, 1H), 7.94 (d,  $J = 8.6$  Hz, 1H), 7.86 (dd,  $J = 17.4, 8.4$  Hz, 2H), 7.62 (ddd,  $J = 8.1, 6.9, 1.1$  Hz, 1H), 7.52 (ddd,  $J = 8.2, 6.9, 1.2$  Hz, 1H), 7.12 (d,  $J = 12.4$  Hz, 1H), 7.01 (d,  $J = 12.4$  Hz, 1H), 6.87 – 6.84 (m, 2H), 6.74 (s, 1H), 6.60 – 6.55 (m, 1H), 2.07 (s, 3H).

**<sup>13</sup>C NMR** (125 MHz,  $CDCl_3$ )

$\delta$  191.47, 141.52, 136.91, 135.30, 135.18, 134.23, 130.26, 129.04, 128.84, 128.06, 127.64, 127.52, 127.21, 127.12, 126.04, 125.38, 124.79, 121.87, 121.49, 20.20.

**HRMS (ESI)** for  $C_{20}H_{16}ONa$   $[M+Na]^+$ : 295.1093, found: 295.1084.

**FTIR** (KBr,  $cm^{-1}$ )

3240.19, 2351.40, 1684.11, 1619.63, 1459.81

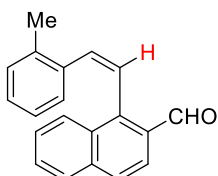

**(Z)-1-(2-methylstyryl)-2-naphthaldehyde (1k)**



Following the procedure A, **1k** was obtained as a yellow solid (0.72 g, 53% yield for four steps, m.p. =111.8 °C).

**<sup>1</sup>H NMR** (500 MHz, CDCl<sub>3</sub>)

δ 10.26 (s, 1H), 8.26 (d, *J* = 8.5 Hz, 1H), 7.88 (d, *J* = 8.0 Hz, 1H), 7.84 (d, *J* = 8.5 Hz, 1H), 7.80 (d, *J* = 8.5 Hz, 1H), 7.65 – 7.62 (m, 1H), 7.59 – 7.56 (m, 1H), 7.34 (d, *J* = 12.0 Hz, 1H), 7.17 (d, *J* = 12.0 Hz, 1H), 7.09 (d, *J* = 7.5 Hz, 1H), 6.96 (td, *J* = 7.5, 1.5 Hz, 1H), 6.63 (d, *J* = 15.0 Hz, 1H), 6.46 (d, *J* = 7.5 Hz, 1H), 2.38 (s, 3H).

**<sup>13</sup>C NMR** (125 MHz, CDCl<sub>3</sub>)

δ 191.04, 140.66, 135.46, 134.97, 134.39, 133.12, 130.67, 129.32, 129.05, 127.89, 127.76, 127.58, 126.97, 126.80, 125.99, 125.10, 124.51, 122.58, 121.57, 18.92.

**HRMS (ESI)** for C<sub>20</sub>H<sub>16</sub>ONa [M+ Na]<sup>+</sup>: 295.1093, found: 295.1083.

**FTIR** (KBr, cm<sup>-1</sup>)

3217.67, 2358.71, 1736.70, 1680.15, 1456.66.

## 2.2 General Procedure B for Substrate Synthesis

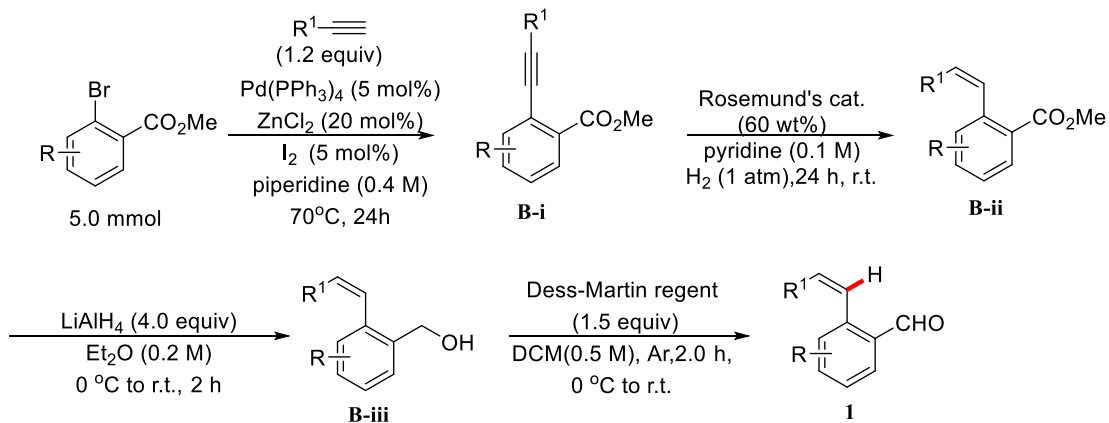

**Alkynylation Reaction:** A solution of Pd(PPh<sub>3</sub>)<sub>4</sub> (5.0 mol%), I<sub>2</sub> (1.0 mol%), ZnCl<sub>2</sub> (20.0 mol%), methyl 1-bromo-2-naphthoate (5.00 mmol) and ethynylbenzene (6.00 mmol) in piperidine (0.4 M) was stirred at 70 °C overnight, then cooled to r.t. and diluted with H<sub>2</sub>O

(20 mL) followed by extraction with EtOAc (30 mL  $\times$  3). The solvent was removed in vacuo, and the crud product was purified by silica gel chromatography (SiO<sub>2</sub>, PE/EA) to obtain the corresponding product **B-i**.

**Hydrogenation Reaction, Ester Reduction and Aldehyde Preparation** were conducted following the general procedure **A**.

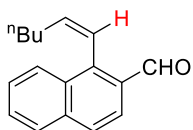

**(Z)-1-(hex-1-en-1-yl)-2-naphthaldehyde (1i)**

Following the procedure **B**, **1i** was obtained as a yellow oil (0.2 g, 17% yield for four steps).

**<sup>1</sup>H NMR** (500 MHz, CDCl<sub>3</sub>)

$\delta$  10.44 (s, 1H), 8.15 (d,  $J = 8.5$  Hz, 1H), 7.99 (d,  $J = 8.5$  Hz, 1H), 7.88 (d,  $J = 8.0$  Hz, 1H), 7.83 (d,  $J = 8.5$  Hz, 1H), 7.65 – 7.62 (m, 1H), 7.58 – 7.54 (m, 1H), 6.87 (d,  $J = 11.5$  Hz, 1H), 6.28 (dt,  $J = 11.5, 7.5$  Hz, 1H), 1.84 (qd,  $J = 7.5, 1.5$  Hz, 2H), 1.33 – 1.26 (m, 2H), 1.19 – 1.11 (m, 2H), 0.72 (t,  $J = 7.5$  Hz, 3H).

**<sup>13</sup>C NMR** (125 MHz, CDCl<sub>3</sub>)

$\delta$  192.04, 141.29, 137.90, 135.03, 130.71, 129.77, 127.82, 127.38, 126.79, 125.67, 125.65, 121.31, 121.09, 29.95, 27.66, 21.17, 12.72.

**HRMS (ESI)** for C<sub>17</sub>H<sub>18</sub>ONa [M+ Na]<sup>+</sup>: 261.1250, found: 261.1252.

**FTIR** (KBr, cm<sup>-1</sup>)

3251.40, 3228.97, 2928.97, 1653.27, 1633.64, 1403.74.

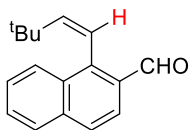

**(Z)-1-(3,3-dimethylbut-1-en-1-yl)-2-naphthaldehyde (1m)**

Following the procedure **B**, **1j** was obtained as a yellow solid (0.8 g, 58% yield for four steps, m.p. = 46.9 °C).

**<sup>1</sup>H NMR** (500 MHz, CDCl<sub>3</sub>)

$\delta$  10.60 (s, 1H), 8.21 (d,  $J = 8.5$  Hz, 1H), 7.95 (d,  $J = 8.5$  Hz, 1H), 7.86 (d,  $J = 8.0$  Hz, 1H), 7.81 (d,  $J = 8.5$  Hz, 1H), 7.63 – 7.60 (m, 1H), 7.58 – 7.55 (m, 1H), 6.64 (d,  $J = 13.0$  Hz, 1H), 6.16 (d,  $J = 13.0$  Hz, 1H), 0.82 (s, 9H).

**$^{13}\text{C}$  NMR** (125 MHz,  $\text{CDCl}_3$ )

$\delta$  192.18, 146.01, 143.07, 134.85, 130.98, 129.57, 127.82, 127.29, 126.62, 126.40, 125.61, 120.80, 117.91, 33.96, 28.93.

**HRMS (ESI)** for  $\text{C}_{17}\text{H}_{18}\text{ONa}$  [ $\text{M} + \text{Na}$ ] $^+$ : 261.1250, found: 261.1258.

**FTIR** (KBr,  $\text{cm}^{-1}$ )

3258.05, 223.36, 2354.21, 1681.31, 1650.47, 1398.13.

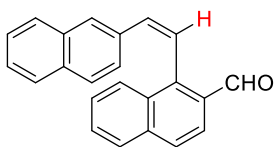

**(Z)-1-(2-(naphthalen-2-yl)vinyl)-2-naphthaldehyde (1n)**

Following the procedure B, **1k** was obtained as a white solid (1.1 g, 71% yield for four steps, m.p. = 156.3 °C).

**$^1\text{H}$  NMR** (500 MHz,  $\text{CDCl}_3$ )

$\delta$  10.45 (s, 1H), 8.29 (d,  $J = 8.5$  Hz, 1H), 7.97 (d,  $J = 8.5$  Hz, 1H), 7.94 – 7.90 (m, 2H), 7.67 – 7.61 (m, 2H), 7.56 – 7.53 (m, 2H), 7.49 (s, 1H), 7.39 (d,  $J = 8.5$  Hz, 1H), 7.37 – 7.34 (m, 2H), 7.33 (s, 1H), 7.16 (d,  $J = 12.5$  Hz, 1H), 6.82 (dd,  $J = 8.5, 1.5$  Hz, 1H).

**$^{13}\text{C}$  NMR** (125 MHz,  $\text{CDCl}_3$ )

$\delta$  191.36, 141.37, 135.24, 135.21, 132.15, 131.99, 131.63, 130.28, 129.07, 128.22, 128.14, 127.59, 127.29, 127.03, 126.90, 126.46, 126.14, 125.43, 125.32, 125.12, 124.80, 122.38, 121.59.

**HRMS (ESI)** for  $\text{C}_{23}\text{H}_{16}\text{ONa}$  [ $\text{M} + \text{Na}$ ] $^+$ : 331.1093, found: 331.1083.

**FTIR** (KBr,  $\text{cm}^{-1}$ )

3247.29, 2356.02, 1688.23, 1639.76, 1400.11.

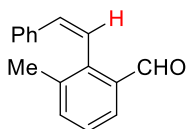

**(Z)-3-methyl-2-styrylbenzaldehyde (1o)**

Following the procedure B, **11** was obtained as a colorless oil (0.3 g, 27% yield for four steps).

**<sup>1</sup>H NMR** (500 MHz, CDCl<sub>3</sub>)

δ 10.20 (s, 1H), 7.75 (d, *J* = 7.5 Hz, 1H), 7.47 (d, *J* = 7.5 Hz, 1H), 7.34 (t, *J* = 7.5 Hz, 1H), 7.13 – 7.10 (m, 3H), 6.94 – 6.87 (m, 3H), 6.73 (d, *J* = 12.5 Hz, 1H), 2.28 (s, 3H).

**<sup>13</sup>C NMR** (125 MHz, CDCl<sub>3</sub>)

δ 191.56, 139.90, 136.22, 134.85, 134.72, 133.10, 132.10, 127.68, 127.39, 126.70, 126.54, 124.63, 123.73, 18.62.

**HRMS (ESI)** for C<sub>16</sub>H<sub>14</sub>ONa [M+ Na]<sup>+</sup>: 245.0937, found: 245.0928.

**FTIR** (KBr, cm<sup>-1</sup>)

3279.44, 2354.21, 1653.27, 1560.75, 1462.62.

### 3. General Procedure for Atroposelective α-C-H Alkenylation

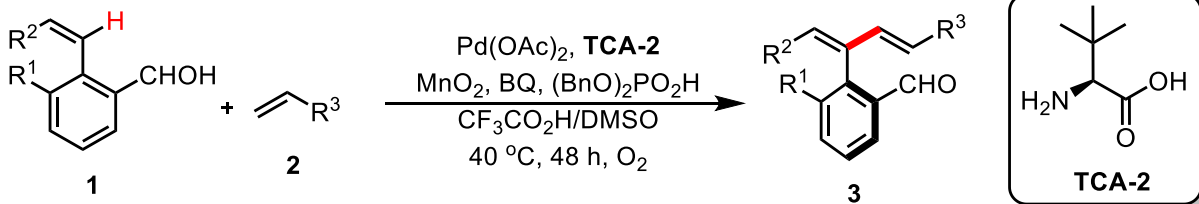

A screw-cap vial was charged with Pd(OAc)<sub>2</sub> (15 mol%, 0.015 mmol), **TCA-2** (45 mol%, 0.045 mmol), MnO<sub>2</sub> (1.5 equiv, 0.15 mmol), BQ (1.0 equiv, 0.1 mmol), (BnO)<sub>2</sub>PO<sub>2</sub>H (2.0 equiv, 0.1 mmol), CF<sub>3</sub>CO<sub>2</sub>H (0.5 mL), DMSO (0.5 mL). Then, aldehyde **1** (1.0 equiv, 0.1 mmol) and olefin **2** (4.0 equiv, 0.4 mmol) were added into the solution in sequence. The vial was sealed under O<sub>2</sub> and heated to 40 °C with stirring for 48 h. After cooling down, the mixture was directly applied to a flash column chromatography (PE / EA).

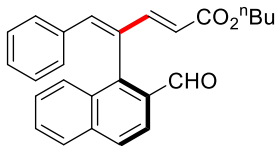

**Butyl (2E,4Z)-4-(2-formylnaphthalen-1-yl)-5-phenylpenta-2,4-dienoate (3a)**

Following the general procedure, **3a** was obtained as a light yellow oil (30.2 mg, 78% yield, 93% *ee*).

**<sup>1</sup>H NMR** (500 MHz, CDCl<sub>3</sub>)

δ 10.11 (s, 1H), 8.08 (d, *J* = 8.5 Hz, 1H), 8.01 (d, *J* = 8.5 Hz, 1H), 7.97 – 7.94 (m, 2H), 7.91 (d, *J* = 8.5 Hz, 1H), 7.65 – 7.62 (m, 1H), 7.49 – 7.46 (m, 2H), 7.11 – 7.08 (m, 1H), 7.01 (t, *J* = 7.5 Hz, 2H), 6.74 (d, *J* = 7.5 Hz, 2H), 5.14 (d, *J* = 15.5 Hz, 1H), 4.12 – 4.03 (m, 2H), 1.60 – 1.54 (m, 2H), 1.37 – 1.29 (m, 2H), 0.89 (t, *J* = 7.5 Hz, 3H).

**<sup>13</sup>C NMR** (125 MHz, CDCl<sub>3</sub>)

δ 190.66, 165.78, 148.23, 141.50, 140.30, 135.55, 133.49, 131.32, 129.84, 129.48, 128.78, 128.43, 128.23, 128.09, 127.65, 127.59, 126.74, 125.21, 121.61, 120.56, 63.47, 29.61, 18.07, 12.65.

**HRMS (ESI)** for C<sub>26</sub>H<sub>24</sub>O<sub>3</sub>Na [M+ Na]<sup>+</sup>: 407.1618, found: 407.1613.

**FTIR** (KBr, cm<sup>-1</sup>)

3442.06, 3383.18, 2957.01, 2354.21, 1689.72, 1656.07, 1636.45, 1557.94, 1541.12, 1510.28, 1406.54, 1398.13, 1033.64.

**Opt. Rot.** [α]<sup>20</sup><sub>D</sub> = -101.9 (c = 0.8, CHCl<sub>3</sub>)

**HPLC** Daicel Chiralpak IA-H column, n-hexane/*i*-PrOH (98/2), 0.5 mL/min, 254 nm, 15.526 min (major enantiomer), 16.693 min (minor enantiomer)..

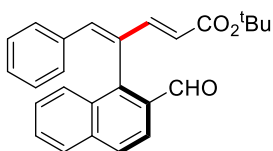

**tert-Butyl (2E,4Z)-4-(2-formylnaphthalen-1-yl)-5-phenylpenta-**

### 2,4-dienoate (**3b**)

Following the general procedure, **3b** was obtained as a yellow oil (26.8 mg, 70% yield, 89% *ee*).

**<sup>1</sup>H NMR** (500 MHz, CDCl<sub>3</sub>)

δ 10.11 (s, 1H), 8.08 (d, *J* = 8.5 Hz, 1H), 8.00 (d, *J* = 8.5 Hz, 1H), 7.94 (dd, *J* = 11.5, 8.5 Hz, 2H), 7.86 (d, *J* = 15.5 Hz, 1H), 7.64 (t, *J* = 7.5 Hz, 1H), 7.48 (t, *J* = 7.5 Hz, 1H), 7.44 (s, 1H), 7.08 (t, *J* = 7.5 Hz, 1H), 7.00 (t, *J* = 7.5 Hz, 2H), 6.73 (d, *J* = 7.5 Hz, 2H), 5.06 (d, *J* = 15.5 Hz, 1H), 1.42 (s, 9H).

**<sup>13</sup>C NMR** (125 MHz, CDCl<sub>3</sub>)

δ 190.82, 165.00, 147.37, 140.95, 140.57, 135.54, 133.60, 131.40, 129.87, 129.47, 128.70, 128.40, 128.14, 127.94, 127.61, 127.56, 126.70, 125.32, 122.50, 121.56, 79.68, 27.03.

**HRMS (ESI)** for C<sub>26</sub>H<sub>24</sub>O<sub>3</sub>Na [M+ Na]<sup>+</sup>: 407.1618, found: 407.1609.

**FTIR** (KBr, cm<sup>-1</sup>)

3321.50, 2914.95, 2359.81, 2320.56, 1667.29, 1625.34, 1459.81.

**Opt. Rot.** [α]<sup>20</sup><sub>D</sub> = -125.2 (c = 0.43, CHCl<sub>3</sub>)

**HPLC** Daicel Chiralpak IA-H column, n-hexane/*i*-PrOH (98/2), 1.0 mL/min, 254 nm, 13.283 min (major enantiomer), 14.281 min (minor enantiomer).

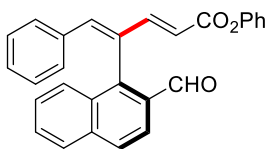

### Phenyl (*2E,4Z*)-4-(2-formylnaphthalen-1-yl)-5-phenylpenta-2,4-dienoate (**3c**)

Following the general procedure, **3c** was obtained as a white oil (37.1 mg, 92% yield, 89% *ee*).

**<sup>1</sup>H NMR** (500 MHz, CDCl<sub>3</sub>)

$\delta$  10.17 (s, 1H), 8.14 (d,  $J = 12.5$  Hz, 1H), 8.12 (d,  $J = 6.0$  Hz, 1H) 8.04 (d,  $J = 8.5$  Hz, 1H), 7.97 (t,  $J = 8.5$  Hz, 2H), 7.66 (t,  $J = 7.5$  Hz, 1H), 7.55 (s, 1H), 7.52 (t,  $J = 7.5$  Hz, 1H), 7.34 (t,  $J = 8.0$  Hz, 2H), 7.19 (t,  $J = 7.5$  Hz, 1H), 7.12 (t,  $J = 7.5$  Hz, 1H), 7.06 – 7.02 (m, 4H), 6.78 (d,  $J = 8.0$  Hz, 2H), 5.32 (d,  $J = 15.5$  Hz, 1H).

**$^{13}\text{C}$  NMR** (125 MHz,  $\text{CDCl}_3$ )

$\delta$  190.57, 164.10, 150.04, 149.54, 142.50, 139.99, 135.60, 133.36, 131.21, 129.79, 129.52, 128.95, 128.54, 128.39, 128.37, 127.75, 127.67, 126.88, 125.14, 124.76, 121.71, 120.44, 119.50.

**HRMS (ESI)** for  $\text{C}_{28}\text{H}_{20}\text{O}_3\text{K}$  [ $\text{M} + \text{K}$ ] $^+$ : 443.1044, found: 443.1050.

**FTIR** (KBr,  $\text{cm}^{-1}$ )

3848.60, 3744.86, 3624.30, 3565.42, 3442.06, 3419.63, 2357.01, 1734.58, 1686.92, 1656.07, 1557.94, 1538.32, 1504.67, 1403.74, 1019.63, 806.54.

**Opt. Rot.** [ $\alpha$ ] $^{20}\text{D} = -83.8$  ( $c = 1.0$ ,  $\text{CHCl}_3$ )

**HPLC** Daicel Chiralpak IA-H column, n-hexane/*i*-PrOH (95/5), 1.0 mL/min, 254 nm, 12.395 min (major enantiomer), 13.416 min (minor enantiomer).

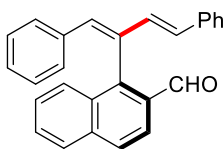

**1-((1Z,3E)-1,4-Diphenylbuta-1,3-dien-2-yl)-2-naphthaldehyde (3d)**

Following the general procedure, **3d** was obtained as a yellow oil (25.3 mg, 71% yield, 94% *ee*).

**$^1\text{H}$  NMR** (500 MHz,  $\text{CDCl}_3$ )

$\delta$  10.19 (s, 1H), 8.11 (d,  $J = 8.5$  Hz, 1H), 8.04 (d,  $J = 8.5$  Hz, 1H), 8.01 (d,  $J = 8.5$  Hz, 1H), 7.96 (d,  $J = 8.0$  Hz, 1H), 7.62 (t,  $J = 7.5$  Hz, 1H), 7.49 – 7.44 (m, 2H), 7.27 – 7.16 (m, 6H), 7.20 – 7.16 (m, 1H), 7.03 –

6.96 (m, 3H), 6.68 (d,  $J = 7.5$  Hz, 2H), 5.79 (d,  $J = 16.0$  Hz, 1H).

**<sup>13</sup>C NMR** (125 MHz, CDCl<sub>3</sub>)

$\delta$  191.40, 142.04, 135.66, 135.49, 134.97, 134.54, 133.46, 133.38, 131.78, 130.33, 129.64, 128.25, 128.01, 127.80, 127.56, 127.48, 127.38, 126.89, 126.69, 126.49, 125.72, 125.50, 121.45.

**HRMS (ESI)** for C<sub>27</sub>H<sub>20</sub>OK [M+ K]<sup>+</sup>: 399.1146, found: 399.1145.

**FTIR** (KBr, cm<sup>-1</sup>)

3245.79, 2359.81, 1698.13, 1650.47, 1541.12, 1451.40.

**Opt. Rot.** [ $\alpha$ ]<sup>20</sup><sub>D</sub> = -25.7 (c = 0.16, CHCl<sub>3</sub>)

**HPLC** Daicel Chiralpak IA-H column, n-hexane/i-PrOH (98/2), 1.0 mL/min, 254 nm, 13.965 min (major enantiomer), 16.944 min (minor enantiomer).

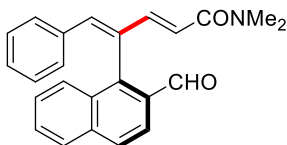

**(2E,4Z)-4-(2-Formylnaphthalen-1-yl)-N,N-dimethyl-5-phenylpenta-2,4-dienamide (3e)**

Following the general procedure, **3e** was obtained as a light yellow solid (31.9 mg, 90% yield, 88% *ee*, m.p. = 54.0 °C).

**<sup>1</sup>H NMR** (500 MHz, CDCl<sub>3</sub>)

$\delta$  10.12 (s, 1H), 8.09 (d,  $J = 9.0$  Hz, 1H), 8.00 (d,  $J = 8.5$  Hz, 1H), 7.97 (d,  $J = 8.0$  Hz, 1H), 7.96 (s, 1H), 7.94 (d,  $J = 9.0$  Hz, 1H), 7.63 (t,  $J = 7.5$  Hz, 1H), 7.49 – 7.46 (m, 2H), 7.07 (t,  $J = 7.5$  Hz, 1H), 7.00 (t,  $J = 7.5$  Hz, 2H), 6.73 (d,  $J = 8.0$  Hz, 2H), 5.56 (d,  $J = 15.0$  Hz, 1H), 2.92 (s, 3H), 2.61 (s, 3H).

**<sup>13</sup>C NMR** (125 MHz, CDCl<sub>3</sub>)



$\delta$  190.96, 165.26, 146.19, 141.04, 140.32, 135.46, 133.76, 131.62, 129.93, 129.49, 128.61, 128.42, 128.05, 127.72, 127.54, 127.52, 126.67, 125.51, 121.46, 120.08, 36.03, 34.71.

**HRMS (ESI)** for C<sub>24</sub>H<sub>21</sub>NO<sub>2</sub>K [M+ K]<sup>+</sup>: 394.1204, found: 394.1201.

**FTIR** (KBr, cm<sup>-1</sup>)

3851.40, 3739.25, 3649.53, 3629.91, 3565.42, 2348.60, 1737.38, 1684.11, 1650.47, 1563.55, 1541.12, 1510.28, 1398.13, 1386.92, 1028.04.

**Opt. Rot.** [ $\alpha$ ]<sup>20</sup><sub>D</sub> = -72.7 (c = 1.0, CHCl<sub>3</sub>)

**HPLC** Daicel Chiralpak OD-H column, n-hexane/i-PrOH (90/10), 1.0 mL/min, 254 nm, 16.816 min (major enantiomer), 19.483 min (minor enantiomer).

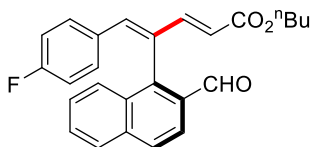

**Butyl (2*E*,4*Z*)-5-(4-fluorophenyl)-4-(2-formylnaphthalen-1-yl)penta-2,4-dienoate (3f)**

Following the general procedure, **3f** was obtained as a light yellow oil (36.5 mg, 91% yield, 94% *ee*).

**<sup>1</sup>H NMR** (500 MHz, CDCl<sub>3</sub>)

$\delta$  10.10 (s, 1H), 8.09 (d, *J* = 8.5 Hz, 1H), 8.02 (d, *J* = 8.5 Hz, 1H), 7.97 – 7.92 (m, 2H), 7.89 (d, *J* = 8.5 Hz, 1H), 7.67 – 7.64 (m, 1H), 7.51 – 7.47 (m, 1H), 7.44 (s, 1H), 6.72 (s, 2H), 6.71 (d, *J* = 1.5 Hz, 2H), 5.14 (d, *J* = 15.5 Hz, 1H), 4.12 – 4.04 (m, 2H), 1.59 – 1.54 (m, 2H), 1.37 – 1.29 (m, 2H), 0.89 (t, *J* = 7.5 Hz, 3H).

**<sup>13</sup>C NMR** (125 MHz, CDCl<sub>3</sub>)

$\delta$  190.52, 165.74, 161.72(d, *J*<sub>CF</sub> = 251.3 Hz), 148.01, 139.97(d, *J*<sub>CF</sub> = 12.5 Hz), 131.01(d, *J*<sub>CF</sub> = 2.5 Hz), 130.59(d, *J*<sub>CF</sub> = 7.5 Hz), 129.79(d,

$J_{CF} = 2.5$  Hz), 129.73, 129.54, 128.45(d,  $J_{CF} = 21.3$  Hz), 127.73, 126.85, 125.06, 121.67, 120.62, 114.89, 114.71, 63.50, 29.60, 18.07, 12.64.

**$^{19}\text{F}$  NMR** (471 MHz,  $\text{CDCl}_3$ )

$\delta$  -110.32.

**HRMS (ESI)** for  $\text{C}_{26}\text{H}_{23}\text{FO}_3\text{Na}$  [ $\text{M} + \text{Na}$ ] $^+$ : 425.1523, found: 425.1501.

**FTIR** (KBr,  $\text{cm}^{-1}$ )

3226.17, 2357.01, 1656.07, 1636.45, 1457.01, 1389.72.

**Opt. Rot.** [ $\alpha$ ] $^{20}\text{D} = -352.9$  ( $c = 0.12$ ,  $\text{CHCl}_3$ )

**HPLC** Daicel Chiralpak IA-H column, n-hexane/*i*-PrOH (98/2), 1.0 mL/min, 254 nm, 17.686 min (major enantiomer), 19.934 min (minor enantiomer).

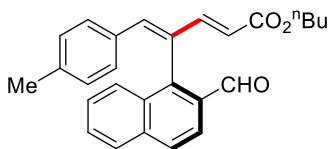

**Butyl (2*E*,4*Z*)-4-(2-formylnaphthalen-1-yl)-5-(*p*-tolyl)penta-2,4-dienoate (3g)**

Following the general procedure and extending the reaction time to 96 hours, **3g** was obtained as a yellow oil (32.7 mg, 82% yield, 83% *ee*).

**$^1\text{H}$  NMR** (500 MHz,  $\text{CDCl}_3$ )

$\delta$  10.10 (s, 1H), 8.08 (d,  $J = 8.5$  Hz, 1H), 8.00 (d,  $J = 8.5$  Hz, 1H), 7.96 (d,  $J = 4.0$  Hz, 1H), 7.94 (d,  $J = 3.0$  Hz, 1H), 7.91 (d,  $J = 8.5$  Hz, 1H), 7.65 – 7.62 (m, 1H), 7.48 – 7.47 (m, 1H), 6.82 (d,  $J = 8.0$  Hz, 2H), 6.63 (d,  $J = 8.0$  Hz, 2H), 5.11 (d,  $J = 15.5$  Hz, 1H), 4.10 – 4.04 (m, 2H), 2.16 (s, 3H), 1.59 – 1.53 (m, 2H), 1.35 – 1.31 (m, 2H), 0.89 (t,  $J = 7.5$  Hz, 3H).

**$^{13}\text{C}$  NMR** (125 MHz,  $\text{CDCl}_3$ )

$\delta$  190.80, 165.89, 148.46, 141.61, 140.61, 138.52, 135.57, 130.77, 130.24, 129.85, 129.48, 128.83, 128.40, 128.38, 128.14, 127.62, 126.69, 125.23, 121.58, 119.93, 63.41, 29.62, 20.17, 18.07, 12.65.

**HRMS (ESI)** for C<sub>27</sub>H<sub>26</sub>O<sub>3</sub>Na [M+ Na]<sup>+</sup>: 421.1774, found: 421.1762.

**FTIR** (KBr, cm<sup>-1</sup>)

3259.81, 2357.01, 1656.07, 1636.45, 1400.93.

**Opt. Rot.** [ $\alpha$ ]<sup>20</sup><sub>D</sub> = -81.9 (c = 0.498, CHCl<sub>3</sub>)

**HPLC** Daicel Chiralpak IA-H column, n-hexane/*i*-PrOH (99/1), 1.0 mL/min, 254 nm, 21.062 min (major enantiomer), 23.744 min (minor enantiomer).

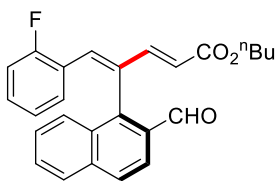

**Butyl (2E,4Z)-5-(2-fluorophenyl)-4-(2-formylnaphthalen-1-yl)penta-2,4-dienoate (3h)**

Following the general procedure and extending the reaction time to 72 hours, **3h** was obtained as a light yellow oil (31.0 mg, 77% yield, 99% *ee*).

**<sup>1</sup>H NMR** (500 MHz, CDCl<sub>3</sub>)

$\delta$  10.12 (s, 1H), 8.07 (d, *J* = 8.5 Hz, 1H), 8.01 – 7.97 (m, 2H), 7.95 (d, *J* = 8.0 Hz, 1H), 7.91 (d, *J* = 8.5 Hz, 1H), 7.76 (s, 1H), 7.66 – 7.63 (m, 1H), 7.52 – 7.49 (m, 1H), 7.09 – 7.05 (m, 1H), 7.00 – 6.96 (m, 1H), 6.51 (t, *J* = 7.5 Hz, 1H), 6.16 (td, *J* = 8.0, 1.5 Hz, 1H), 5.18 (d, *J* = 15.5 Hz, 1H), 4.13 – 4.05 (m, 2H), 1.60 – 1.55 (m, 2H), 1.37 – 1.30 (m, 2H), 0.90 (t, *J* = 7.5 Hz, 3H).

**<sup>13</sup>C NMR** (125 MHz, CDCl<sub>3</sub>)

$\delta$  190.49, 165.62, 160.08(d, *J*<sub>CF</sub> = 251.3 Hz), 147.83, 139.79, 135.46, 132.90(d, *J*<sub>CF</sub> = 2.5 Hz), 132.32(d, *J*<sub>CF</sub> = 6.3 Hz), 129.81, 129.72,

129.65, 129.58, 128.47, 128.35, 127.70, 127.49(d,  $J_{CF} = 2.5$  Hz), 126.84, 125.16, 122.97(d,  $J_{CF} = 3.8$  Hz), 121.60, 121.36, 114.65(d,  $J_{CF} = 21.3$  Hz), 63.56, 29.60, 18.08, 12.65.

**$^{19}\text{F}$  NMR** (471 MHz,  $\text{CDCl}_3$ )  $\delta$  -114.98.

**HRMS (ESI)** for  $\text{C}_{26}\text{H}_{23}\text{FO}_3\text{Na}$  [ $\text{M} + \text{Na}$ ] $^+$ : 425.1523, found: 425.1554.

**FTIR** (KBr,  $\text{cm}^{-1}$ )

3217.76, 2357.01, 1658.88, 1636.45, 1462.6, 1162.62.

**Opt. Rot.**  $[\alpha]^{20}_{\text{D}} = -77.8$  ( $c = 0.512$ ,  $\text{CHCl}_3$ )

**HPLC** Daicel Chiralpak IA-H column, n-hexane/*i*-PrOH (99/1), 1.0 mL/min, 254 nm, 15.198 min (major enantiomer), 17.346 min (minor enantiomer).

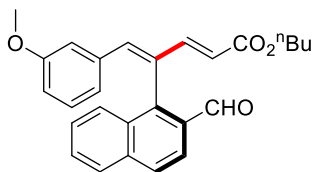

**Butyl (2*E*,4*Z*)-4-(2-formylnaphthalen-1-yl)-5-(3-methoxyphenyl)penta-2,4-dienoate (3i)**

Following the general procedure, **3i** was obtained as a yellow oil (37.2 mg, 90% yield, 87% *ee*).

**$^1\text{H}$  NMR** (500 MHz,  $\text{CDCl}_3$ )

$\delta$  10.11 (s, 1H), 8.09 (d,  $J = 8.5$  Hz, 1H), 8.00 (d,  $J = 8.5$  Hz, 1H), 7.96 (d,  $J = 9.5$  Hz, 1H), 7.94 – 7.92 (m, 2H), 7.66 – 7.63 (m, 1H), 7.51 – 7.45 (m, 1H), 7.45 (s, 1H), 6.98 (t,  $J = 16.0$  Hz, 1H), 6.65 (dd,  $J = 8.0, 2.0$  Hz, 1H), 6.51 (d,  $J = 7.5$  Hz, 1H), 6.11 – 6.10 (m, 1H), 5.18 (d,  $J = 15.5$  Hz, 1H), 4.12 – 4.04 (m, 2H), 3.19 (s, 3H), 1.60 – 1.54 (m, 2H), 1.37 – 1.30 (m, 2H), 0.89 (t,  $J = 7.5$  Hz, 3H).

**$^{13}\text{C}$  NMR** (125 MHz,  $\text{CDCl}_3$ )

$\delta$  190.61, 165.76, 158.25, 148.11, 141.34, 140.38, 135.51, 134.70, 131.49, 129.95, 129.58, 128.51, 128.15, 127.57, 126.84, 125.27, 122.14, 121.63, 120.71, 115.09, 112.28, 63.49, 53.50, 29.61, 18.08, 12.65.

**HRMS (ESI)** for  $C_{27}H_{26}O_4Na$   $[M+Na]^+$ : 437.1723, found: 437.1701.

**FTIR** (KBr,  $cm^{-1}$ )

3234.58, 2357.01, 1650.47, 1633.64, 1392.52.

**Opt. Rot.**  $[\alpha]^{20}_D = -130.9$  ( $c = 0.498$ ,  $CHCl_3$ )

**HPLC** Daicel Chiralpak IC-H column, n-hexane/*i*-PrOH (90/10), 1.0 mL/min, 254 nm, 19.065 min (major enantiomer), 27.883 min (minor enantiomer).

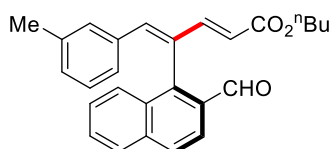

**Butyl (2E,4Z)-4-(2-formylnaphthalen-1-yl)-5-(m-tolyl)penta-2,4-dienoate (3j)**

Following the general procedure, **3j** was obtained as a yellow oil (31.7 mg, 80% yield, 89% *ee*).

**<sup>1</sup>H NMR** (500 MHz,  $CDCl_3$ )

$\delta$  10.10 (s, 1H), 8.08 (d,  $J = 8.5$  Hz, 1H), 8.01 (d,  $J = 8.5$  Hz, 1H), 7.97 – 7.94 (m, 2H), 7.91 (d,  $J = 8.5$  Hz, 1H), 7.65 – 7.62 (m, 1H), 7.49 – 7.46 (m, 1H), 7.44 (s, 1H), 6.91 (d,  $J = 7.5$  Hz, 1H), 6.85 (t,  $J = 7.5$  Hz, 1H), 6.63 (s, 1H), 6.43 (d,  $J = 8.0$  Hz, 1H), 5.14 (d,  $J = 15.5$  Hz, 1H), 4.12 – 4.03 (m, 2H), 2.05 (s, 3H), 1.60 – 1.54 (m, 2H), 1.37 – 1.29 (m, 2H), 0.89 (t,  $J = 7.5$  Hz, 3H).

**<sup>13</sup>C NMR** (125 MHz,  $CDCl_3$ )

$\delta$  190.74, 165.85, 148.33, 141.75, 140.51, 137.09, 135.53, 133.43, 131.11, 130.08, 129.88, 129.48, 128.93, 128.39, 128.12, 127.59, 127.44,

126.70, 125.52, 125.24, 121.55, 120.35, 63.45, 29.61, 20.15, 18.07, 12.65.

**HRMS (ESI)** for C<sub>27</sub>H<sub>26</sub>O<sub>3</sub>Na [M+ Na]<sup>+</sup>: 421.1774, found: 421.1759.

**FTIR** (KBr, cm<sup>-1</sup>)

3320.56, 2357.01, 1650.47, 1633.64, 1395.33.

**Opt. Rot.** [ $\alpha$ ]<sup>20</sup><sub>D</sub> = -143.8 (c = 0.44, CHCl<sub>3</sub>)

**HPLC** Daicel Chiralpak IA-H column, n-hexane/*i*-PrOH (98/2), 1.0 mL/min, 254 nm, 12.303 min (major enantiomer), 14.067 min (minor enantiomer).

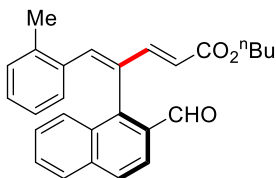

**Butyl (2*E*,4*Z*)-4-(2-formylnaphthalen-1-yl)-5-(*o*-tolyl)penta-2,4-dienoate (3k)**

Following the general procedure and extending the reaction time to 72 hours, **3k** was obtained as a light yellow oil (33.2 mg, 83% yield, 97% *ee*).

**<sup>1</sup>H NMR** (500 MHz, CDCl<sub>3</sub>)

$\delta$  10.10 (d, *J* = 0.5 Hz, 1H), 8.01 – 7.98 (m, 2H), 7.94 – 7.91 (m, 3H), 7.71 (s, 1H), 7.64 – 7.61 (m, 1H), 7.53 – 7.49 (m, 1H), 7.09 (d, *J* = 7.5 Hz, 1H), 6.96 (t, *J* = 7.0 Hz, 1H), 6.55 (t, *J* = 7.5 Hz, 1H), 6.29 (d, *J* = 8.0 Hz, 1H), 5.16 (d, *J* = 15.5 Hz, 1H), 4.13 – 4.04 (m, 2H), 2.47 (s, 3H), 1.60 – 1.54 (m, 2H), 1.37 – 1.29 (m, 2H), 0.89 (t, *J* = 7.5 Hz, 3H).

**<sup>13</sup>C NMR** (125 MHz, CDCl<sub>3</sub>)

$\delta$  190.61, 165.91, 148.09, 140.14, 139.67, 136.49, 135.32, 132.28, 131.84, 130.36, 129.65, 129.48, 128.23, 128.01, 127.82, 127.69, 126.81, 126.62, 125.43, 124.70, 121.51, 120.57, 63.51, 29.61, 19.23, 18.06, 12.65.

**HRMS (ESI)** for C<sub>27</sub>H<sub>26</sub>O<sub>3</sub>Na [M+ Na]<sup>+</sup>: 421.1774, found: 421.1761.

**FTIR** (KBr, cm<sup>-1</sup>)

3203.74, 2354.21, 1650.47, 1628.04, 1398.13.

**Opt. Rot.** [α]<sup>20</sup><sub>D</sub> = -116.3 (c = 0.544, CHCl<sub>3</sub>)

**HPLC** Daicel Chiralpak IC-H column, n-hexane/i-PrOH (92/8), 1.0 mL/min, 254 nm, 14.602 min (major enantiomer), 16.477 min (minor enantiomer).

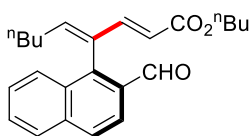

**Butyl (3*E*,5*Z*)-5-(2-formylnaphthalen-1-yl)deca-3,5-dienoate (31)**

Following the general procedure and extending the reaction time to 72 hours, **31** was obtained as a light yellow oil (23.5 mg, 65% yield, 85% *ee*).

**<sup>1</sup>H NMR** (500 MHz, CDCl<sub>3</sub>)

δ 10.11 (s, 1H), 8.05 (d, *J* = 8.5 Hz, 1H), 7.94 – 7.91 (m, 2H), 7.85 (d, *J* = 8.5 Hz, 1H), 7.77 (d, *J* = 15.5 Hz, 1H), 7.65 – 7.62 (m, 1H), 7.53 – 7.50 (m, 1H), 6.68 (t, *J* = 7.5 Hz, 1H), 5.06 (d, *J* = 15.5 Hz, 1H), 4.10 – 4.01 (m, 2H), 1.79 (q, *J* = 7.5 Hz, 2H), 1.58 – 1.52 (m, 2H), 1.34 – 1.28 (m, 4H), 1.18 – 1.11 (m, 2H), 0.88 (t, *J* = 7.5 Hz, 3H), 0.72 (t, *J* = 7.5 Hz, 3H).

**<sup>13</sup>C NMR** (125 MHz, CDCl<sub>3</sub>)

δ 191.12, 165.96, 146.89, 146.00, 140.14, 135.41, 132.35, 130.06, 129.77, 128.16, 127.80, 127.52, 126.29, 125.37, 121.14, 119.45, 76.20, 63.36, 29.61, 28.94, 21.26, 18.06, 12.67, 12.63.

**HRMS (ESI)** for C<sub>25</sub>H<sub>30</sub>O<sub>3</sub>Na [M+ Na]<sup>+</sup>: 401.2087, found: 401.2100.

**FTIR** (KBr, cm<sup>-1</sup>)

3226.17, 2354.21, 1653.27, 1633.64, 1538.32, 1457.01.

**Opt. Rot.** [α]<sup>20</sup><sub>D</sub> = -37.5 (c = 0.21, CHCl<sub>3</sub>)

**HPLC** Daicel Chiralpak OD-H column, n-hexane/*i*-PrOH (98/2), 1.0 mL/min, 254 nm, 6.518 min (major enantiomer), 7.693 min (minor enantiomer).

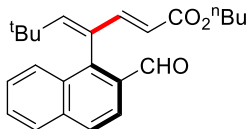

**Butyl (3*E*,5*Z*)-5-(2-formylnaphthalen-1-yl)-7,7-dimethylocta-3,5-dienoate (3m)**

Following the general procedure and extending the reaction time to 72 hours, **3m** was obtained as a light yellow oil (15.4 mg, 42% yield, 33% *ee*).

**<sup>1</sup>H NMR** (500 MHz, CDCl<sub>3</sub>)

δ 10.17 (s, 1H), 8.02 (d, *J* = 8.5 Hz, 1H), 7.92 – 7.89 (m, 3H), 7.72 (d, *J* = 15.5 Hz, 1H), 7.62 (t, *J* = 7.5 Hz, 1H), 7.54 – 7.51 (m, 1H), 6.61 (s, 1H), 4.96 (d, *J* = 15.5 Hz, 1H), 4.31 (t, *J* = 6.5 Hz, 1H), 4.08 – 4.00 (m, 2H), 1.56 – 1.51 (m, 2H), 1.33 – 1.29 (m, 2H), 0.88 (t, *J* = 7.5 Hz, 3H), 0.78 (s, 9H).

**<sup>13</sup>C NMR** (125 MHz, CDCl<sub>3</sub>)

δ 191.35, 165.91, 154.91, 149.48, 140.56, 135.09, 130.93, 130.03, 129.88, 128.61, 128.06, 127.79, 127.43, 126.23, 125.93, 120.95, 119.29, 64.55, 63.34, 34.11, 29.60, 28.68, 18.06, 12.64.

**HRMS (ESI)** for C<sub>25</sub>H<sub>30</sub>O<sub>3</sub>Na [M+ Na]<sup>+</sup>: 401.2087, found: 401.2076.

**FTIR** (KBr, cm<sup>-1</sup>)

3232.78, 2351.40, 1650.47, 1625.23, 1507.48, 1022.43.

**Opt. Rot.** [α]<sup>20</sup><sub>D</sub> = +0.3 (c = 0.12, CHCl<sub>3</sub>)

**HPLC** Daicel Chiralpak OD-H column, n-hexane/*i*-PrOH (98/2), 1.0 mL/min, 254 nm, 5.636 min (major enantiomer), 6.204 min (minor enantiomer).



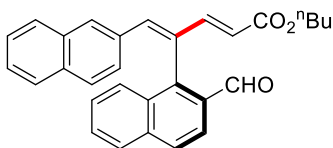

**Butyl (3E,5Z)-5-(2-formylnaphthalen-1-yl)-6-(naphthalen-2-yl)hexa-3,5-dienoate (3n)**

Following the general procedure and extending the reaction time to 96 hours, **3n** was obtained as a light yellow oil (35.0 mg, 81% yield, 85% *ee*).

**<sup>1</sup>H NMR** (500 MHz, CDCl<sub>3</sub>)

δ 10.15 (s, 1H), 8.11 (d, *J* = 8.5 Hz, 1H), 8.05 – 8.00 (m, 2H), 7.96 (t, *J* = 8.4 Hz, 2H), 7.65 – 7.61 (m, 2H), 7.60 – 7.59 (m, 1H), 7.49 – 7.45 (m, 2H), 7.39 – 7.33 (m, 4H), 6.65 (dd, *J* = 8.5, 2.0 Hz, 1H), 5.20 (d, *J* = 15.5 Hz, 1H), 4.15 – 4.02 (m, 2H), 1.62 – 1.55 (m, 2H), 1.38 – 1.30 (m, 2H), 0.90 (t, *J* = 7.5 Hz, 3H).

**<sup>13</sup>C NMR** (125 MHz, CDCl<sub>3</sub>)

δ 190.68, 165.83, 148.29, 141.59, 140.40, 135.57, 132.09, 131.91, 131.52, 131.12, 130.00, 129.97, 129.70, 128.48, 128.27, 127.65, 127.40, 127.20, 126.79, 126.37, 126.13, 125.41, 125.23, 124.75, 121.63, 120.51, 63.48, 29.62, 18.08, 12.66.

**HRMS (ESI)** for C<sub>31</sub>H<sub>28</sub>O<sub>3</sub>K [M+ K]<sup>+</sup>: 487.1670, found: 487.1654.

**FTIR** (KBr, cm<sup>-1</sup>)

3172.90, 2359.81, 1656.07, 1507.48, 1386.92.

**Opt. Rot.** [α]<sup>20</sup><sub>D</sub> = -171.3 (c = 0.592, CHCl<sub>3</sub>)

**HPLC** Daicel Chiralpak IC-H column, n-hexane/*i*-PrOH (90/10), 1.0 mL/min, 254 nm, 19.763 min (major enantiomer), 23.790 min (minor enantiomer).

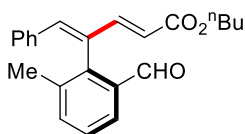

**Butyl (3E,5Z)-5-(2-formyl-6-methylphenyl)-6-phenylhexa-3,5-die**

**noate (3o)**

Following the general procedure and extending the reaction time to 96 hours, **3o** was obtained as a light yellow oil (31.7 mg, 91% yield, 95% *ee*).

**<sup>1</sup>H NMR** (500 MHz, CDCl<sub>3</sub>)

δ 9.91 (s, 1H), 7.92 (d, *J* = 8.0 Hz, 1H), 7.79 (d, *J* = 16.0 Hz, 1H), 7.58 (d, *J* = 8.0 Hz, 1H), 7.49 (t, *J* = 7.5 Hz, 1H), 7.21 (s, 1H), 7.19 – 7.16 (m, 1H), 7.15 – 7.11 (m, 2H), 6.85 – 6.83 (m, 2H), 5.25 (s, 1H), 4.15 – 4.10 (m, 2H), 2.14 (s, 3H), 1.63 – 1.60 (m, 2H), 1.40 – 1.36 (m, 2H), 0.93 (t, *J* = 7.5 Hz, 3H).

**<sup>13</sup>C NMR** (125 MHz, CDCl<sub>3</sub>)

δ 190.90, 165.89, 147.71, 139.94, 138.86, 136.32, 135.54, 133.99, 132.67, 132.54, 128.49, 128.05, 127.68, 127.65, 124.91, 119.55, 63.48, 29.67, 18.12, 17.74, 12.69.

**HRMS (ESI)** for C<sub>24</sub>H<sub>26</sub>O<sub>3</sub>Na [M+ Na]<sup>+</sup>: 385.1774, found: 385.1753.

**FTIR** (KBr, cm<sup>-1</sup>)

3245.79, 2357.01, 1653.27, 1633.64, 1457.01.

**Opt. Rot.** [α]<sup>20</sup><sub>D</sub> = + 1.8 (c = 0.498, CHCl<sub>3</sub>)

**HPLC** Daicel Chiralpak OD-H column, n-hexane/*i*-PrOH (99/1), 1.0 mL/min, 254 nm, 14.244 min (major enantiomer), 16.127 min (minor enantiomer).

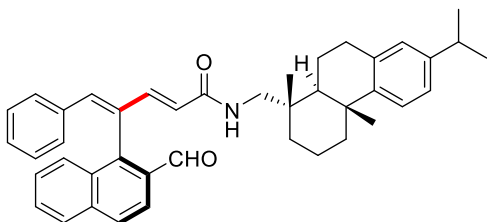

**(2E,4Z)-4-(2-Formylnaphthalen-1-yl)-N-(((1S,4aR,10aS)-7-isopropyl-1,4a-dimethyl-1,2,3,4,4a,9,10,10a-octahydrophenanthren-1-yl)methyl)-5-phenylpenta-2,4-dienamide (3p)**

Following the general procedure, **3p** was obtained as a white solid (47.7 mg, 80% yield, 86% *ee*, m.p. = 92.5 °C).

**<sup>1</sup>H NMR** (500 MHz, CDCl<sub>3</sub>)

δ 10.09 (s, 1H), 8.08 (d, *J* = 8.5 Hz, 1H), 7.99 (d, *J* = 8.5 Hz, 1H), 7.94 – 7.91 (m, 3H), 7.62 (t, *J* = 7.5 Hz, 1H), 7.47 – 7.44 (m, 2H), 7.12 (d, *J* = 8.0 Hz, 1H), 7.08 – 7.05 (m, 1H), 7.01 – 6.95 (m, 3H), 6.85 (s, 1H), 6.70 (d, *J* = 8.0 Hz, 2H), 5.14 (t, *J* = 6.5 Hz, 1H), 5.05 (d, *J* = 15.0 Hz, 1H), 3.21 – 3.09 (m, 2H), 2.89 – 2.74 (m, 3H), 2.21 (d, *J* = 12.5 Hz, 1H), 1.84 – 1.59 (m, 6H), 1.26 – 1.16 (m, 8H), 1.16 (s, 3H), 0.88 (s, 3H).

**<sup>13</sup>C NMR** (125 MHz, CDCl<sub>3</sub>)

δ 190.94, 164.62, 146.07, 145.41, 144.65, 140.90, 140.62, 135.49, 133.71, 133.68, 131.22, 129.93, 129.49, 128.61, 128.43, 128.07, 127.76, 127.54, 127.51, 126.78, 125.83, 125.56, 123.04, 122.90, 122.83, 121.62, 48.81, 43.94, 37.08, 36.45, 36.33, 34.85, 32.38, 28.89, 28.68, 24.18, 22.93, 17.79, 17.74, 17.41.

**HRMS (ESI)** for C<sub>42</sub>H<sub>45</sub>NO<sub>2</sub>Na [M+ Na]<sup>+</sup>: 618.3343, found: 618.3315.

**FTIR** (KBr, cm<sup>-1</sup>)

3287.85, 2357.01, 1656.07, 1636.45, 1457.01.

**Opt. Rot.** [α]<sup>20</sup><sub>D</sub> = -307.6 (c = 0.054, CHCl<sub>3</sub>)

**HPLC** Daicel Chiralpak IC-H column, n-hexane/*i*-PrOH (90/10), 1.0 mL/min, 254 nm, 28.443 min (major enantiomer), 48.025 min (minor enantiomer).

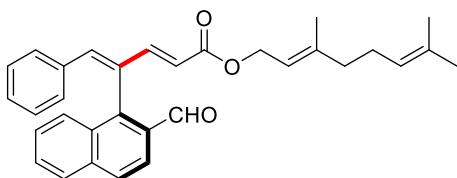

**(*E*)-3,7-Dimethylocta-2,6-dien-1-yl (2*E*,4*Z*)-4-(2-formylphenyl)-5-phenylpenta-2,4-dienoate (3q)**

Following the general procedure, **3q** was obtained as a brown oil (39.2 mg, 84% yield, 88% *ee*).

**<sup>1</sup>H NMR** (500 MHz, CDCl<sub>3</sub>)

δ 10.10 (s, 1H), 8.07 (d, *J* = 8.5 Hz, 1H), 8.00 (d, *J* = 8.5 Hz, 1H), 7.98 – 7.94 (m, 2H), 7.91 (d, *J* = 8.5 Hz, 1H), 7.64 – 7.62 (m, 1H), 7.49 – 7.46 (m, 2H), 7.09 (t, *J* = 7.5 Hz, 1H), 7.01 (t, *J* = 7.5 Hz, 2H), 6.75 (d, *J* = 7.5 Hz, 2H), 7.30 – 7.27 (m, 1H), 5.15 (d, *J* = 15.5 Hz, 1H), 5.06 – 5.03 (m, 1H), 4.60 (d, *J* = 7.0 Hz, 2H), 2.09 – 2.04 (m, 2H), 2.02 – 1.99 (m, 2H), 1.66 (d, *J* = 6.5 Hz, 6H), 1.57 (s, 3H).

**<sup>13</sup>C NMR** (125 MHz, CDCl<sub>3</sub>)

δ 190.64, 165.71, 148.33, 141.66, 141.52, 140.29, 135.55, 133.50, 131.34, 130.80, 129.83, 129.46, 128.79, 128.43, 128.21, 128.10, 127.65, 127.60, 126.73, 125.21, 122.66, 121.60, 120.56, 116.90, 60.46, 38.49, 25.21, 24.64, 16.65, 15.44.

**HRMS (ESI)** for C<sub>32</sub>H<sub>32</sub>O<sub>3</sub>K [M+ K]<sup>+</sup>: 503.1983, found: 503.1976.

**FTIR** (KBr, cm<sup>-1</sup>)

3273.83, 2359.81, 2328.97, 1656.07, 1633.64, 1504.67, 1466.62.

**Opt. Rot.** [α]<sup>20</sup><sub>D</sub> = -147.9 (c = 0.276, CHCl<sub>3</sub>)

**HPLC** Daicel Chiralpak IA-H column, n-hexane/*i*-PrOH (98/2), 1.0 mL/min, 254 nm, 12.494 min (major enantiomer), 13.771 min (minor enantiomer).

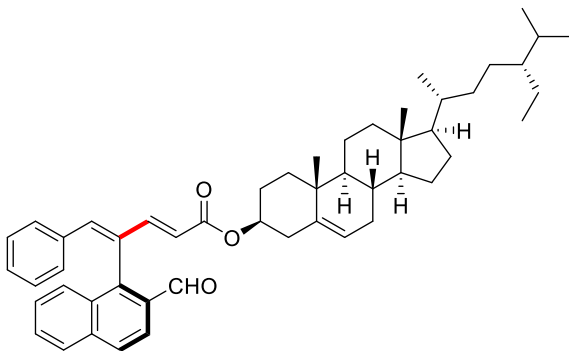

(3*S*,8*S*,9*S*,10*R*,13*R*,14*S*,17*R*)-17-((2*R*,5*R*)-5

-Ethyl-6-methylheptan-2-yl)-10,13-dimethyl-2,3,4,7,8,9,10,11,12,13,14,15,16,17-tetra  
decahydro-1*H*-cyclopenta[*a*]phenanthren-3-yl (2*E*,4*Z*)-4-(2-formylnaphthalen-1-yl)-  
5-phenylpenta-2,4-dienoate (**3r**)

Following the general procedure, **3r** was obtained as a white solid (54.7 mg, 75% yield, 98% *ee*, m.p. = 76.8 °C).

**<sup>1</sup>H NMR** (500 MHz, CDCl<sub>3</sub>)

δ 10.11 (s, 1H), 8.08 (d, *J* = 8.5 Hz, 1H), 8.00 (d, *J* = 8.5 Hz, 1H), 7.96 (s, 1H), 7.93 (dd, *J* = 10.5, 7.0 Hz, 2H), 7.65 – 7.62 (m, 1H), 7.50 – 7.46 (m, 2H), 7.09 (d, *J* = 14.5 Hz, 1H), 7.01 (d, *J* = 15.5 Hz, 2H), 6.74 (d, *J* = 7.5 Hz, 2H), 5.36 (d, *J* = 5.0 Hz, 1H), 5.12 (d, *J* = 15.5 Hz, 1H), 4.66 – 4.59 (m, 1H), 2.33 – 2.24 (m, 2H), 2.01 – 1.94 (m, 2H), 1.86 – 1.80 (m, 3H), 1.48 – 0.79 (m, 36H), 0.67 (d, *J* = 9.0 Hz, 3H).

**<sup>13</sup>C NMR** (125 MHz, CDCl<sub>3</sub>)

δ 190.70, 165.08, 148.15, 141.42, 140.36, 138.51, 135.56, 133.52, 131.35, 129.84, 129.48, 128.77, 128.43, 128.20, 128.06, 127.64, 127.59, 126.73, 125.25, 121.70, 121.61, 120.98, 73.22, 55.65, 54.99, 48.98, 44.81, 41.27, 38.68, 35.93, 35.54, 35.12, 32.91, 30.82, 28.12, 27.21, 26.71, 25.04, 23.26, 22.04, 19.98, 18.80, 18.24, 18.01, 17.75, 17.23, 14.35, 10.96, 10.82.

**HRMS (ESI)** for C<sub>51</sub>H<sub>64</sub>O<sub>3</sub>Na [M+ Na]<sup>+</sup>: 747.4748, found: 747.4703.

**FTIR** (KBr, cm<sup>-1</sup>)

3251.40, 2357.1, 1653.27, 1633.64, 1451.40.

**Opt. Rot.**  $[\alpha]^{20}_D = -111.9$  ( $c = 0.36$ ,  $\text{CHCl}_3$ )

**HPLC** Daicel Chiralpak IC-H column, n-hexane/i-PrOH (95/5), 1.0 mL/min, 254 nm, 14.550 min (major enantiomer), 16.680 min (minor enantiomer).

#### 4. Gram-scaled preparation

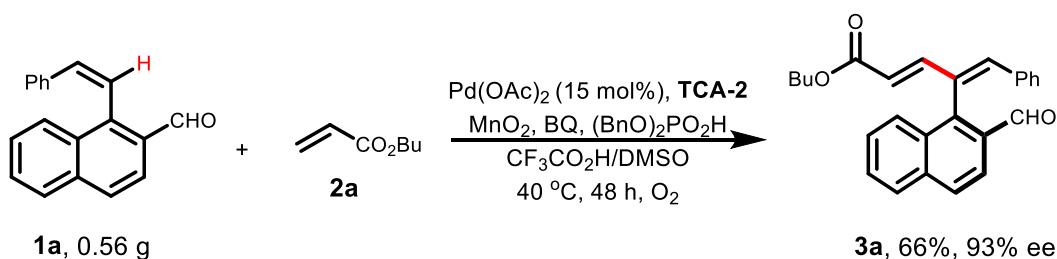

A screw-cap vial was charged with  $\text{Pd}(\text{OAc})_2$  (15 mol%, 0.33 mmol), **TCA-2** (45 mol%, 0.99 mmol),  $\text{MnO}_2$  (1.5 equiv, 3.3 mmol), BQ (1.0 equiv, 2.2 mmol),  $(\text{BnO})_2\text{PO}_2\text{H}$  (2.0 equiv, 4.4 mmol),  $\text{CF}_3\text{CH}_2\text{OH}$  (11 mL), DMSO (11 mL). Then, aldehyde **1** (1.0 equiv, 2.2 mmol, 0.56 g) and olefin **2** (4.0 equiv, 8.8 mmol) were added into the solution in sequence. The vial was sealed under  $\text{O}_2$  and heated to  $40\text{ }^\circ\text{C}$  with stirring for 48 h. After cooling down, the mixture was directly applied to a flash column chromatography (PE / EA). Product **3a** was obtained as a light yellow oil (0.56 g, 66% yield, 93% ee).

## 5. Further Elaboration

### 5.1 General procedure for the preparation of axial Chiral Carboxylic Acids **4** (CCAs) :

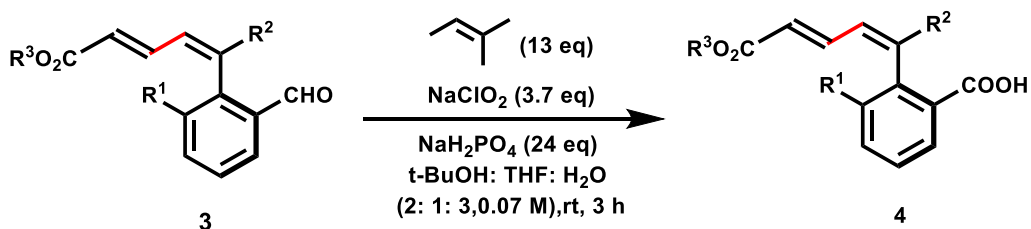

To a solution of the aldehyde **3** (0.2 mmol) in a mixture of t-BuOH/THF/H<sub>2</sub>O (3 mL, 2:1:3) at 0 °C were added NaH<sub>2</sub>PO<sub>4</sub> (4.8 mmol, 24.0 equiv), 2-methyl-2-butene (2.6 mmol, 13.0 equiv), and followed by NaClO<sub>2</sub> (0.74 mmol, 3.7 equiv). The mixture was allowed to warm to room temperature. The reaction mixture either continued stirring at the same temperature for 3 h until of the carboxylic acid intermediates were consumed. The organic solution was concentrated in vacuo to give an orange oil, which was dissolved in 10 mL EtOAc. The organic solution was washed with HCl (2 M, 10 mL x 2), water (10 mL), and brine (10 mL). The organic layer was then dried with Na<sub>2</sub>SO<sub>4</sub> and concentrated in vacuo to afford the crude olefin. Purification by column chromatography (PE/Ea) afforded acid (**4**).

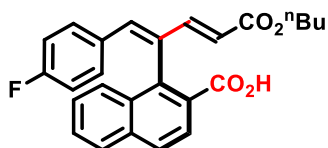

**1-((1Z,3E)-5-butoxy-1-(4-fluorophenyl)-5-oxopenta-1,3-dien-2-yl)-2-naphthoic acid (**4a**)**

Following the General procedure with **3a** (0.1 mmol), **4a** was obtained as a yellow liquid (38.9 mg, 93% yield, 92% *ee*).

**<sup>1</sup>H NMR** (500 MHz, CDCl<sub>3</sub>)

δ 8.17 (d, *J* = 8.7 Hz, 1H), 7.98 (d, *J* = 8.7 Hz, 1H), 7.95 – 7.84 (m, 3H), 7.61 – 7.54 (m, 1H), 7.43 (ddd, *J* = 8.2, 6.9, 1.1 Hz, 1H), 7.22 (s, 1H),

6.73 – 6.62 (m, 4H), 5.07 (d,  $J = 15.5$  Hz, 4H), 4.06 (t,  $J = 6.8$  Hz, 2H), 1.55 (dt,  $J = 14.6, 6.9$  Hz, 3H), 1.31 (dt,  $J = 13.5, 6.8$  Hz, 3H), 0.87 (t,  $J = 7.4$  Hz, 3H).

**$^{13}\text{C}$  NMR** (125 MHz,  $\text{CDCl}_3$ )

$\delta$  171.24 , 167.43 , 163.32 , 161.34 , 149.38 , 138.19 , 138.07 , 135.80 , 135.68 (d,  $J = 2.3$  Hz), 131.75 (d,  $J = 3.4$  Hz), 131.08 (d,  $J = 8.1$  Hz), 130.73 , 128.76 (d,  $J = 8.1$  Hz), 128.32 , 127.64 , 126.79 (d,  $J = 2.5$  Hz), 126.49 , 119.32 , 115.47 (d,  $J = 21.6$  Hz), 64.39 , 30.65 , 19.13 , 13.71 .

**FTIR** (KBr,  $\text{cm}^{-1}$ )

3448.85, 2960.44, 2831.32, 2716.53, 2359.81, 2343.55, 1597.12, 1364.17, 1068.5, 776.01, 556.91, 454.38

**Opt. Rot.**  $[\alpha]^{20}_{\text{D}} = -60.2$  ( $c = 0.54$ ,  $\text{CHCl}_3$ )

**HPLC** Daicel Chiralpak IA column, n-hexane/i-PrOH (60/40), 1 mL/min, 254 nm, 7.390 min (major enantiomer), 17.881 min (minor enantiomer).

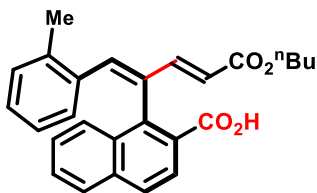

**1-((1Z,3E)-5-butoxy-5-oxo-1-(o-tolyl)penta-1,3-dien-2-yl)-2-naphthoic acid (4b)**

Following the General procedure with **3b** (0.1 mmol), **4b** was obtained as a yellow liquid (37.3 mg, 90% yield, 96%

*ee*).

**$^1\text{H}$  NMR** (500 MHz,  $\text{CDCl}_3$ )

$\delta$  8.07 (d,  $J = 8.7$  Hz, 1H), 7.94 (d,  $J = 15.6$  Hz, 1H), 7.92 – 7.86 (m, 3H), 7.56 (d,  $J = 7.1$  Hz, 1H), 7.49 – 7.43 (m, 2H), 7.01 (d,  $J = 7.5$  Hz, 1H), 6.91 (t,  $J = 7.4$  Hz, 1H), 6.55 (t,  $J = 7.6$  Hz, 1H), 6.37 (d,  $J = 7.8$  Hz, 1H), 5.11 (d,  $J = 15.5$  Hz, 1H), 4.08 (t,  $J = 6.5$  Hz, 2H), 2.40 (s, 3H), 1.57 (dt,  $J = 14.7, 6.9$  Hz, 2H), 1.33 (dq,  $J = 14.9, 7.5$  Hz, 2H), 0.88 (t,  $J = 7.4$  Hz, 3H).



**<sup>13</sup>C NMR** (125 MHz, CDCl<sub>3</sub>)

171.64 , 167.51 , 149.34 , 138.16 , 138.08 , 137.12 , 136.55 , 135.50 ,  
134.39 , 131.38 , 130.04 , 128.44 , 128.37 , 128.29 , 128.06 , 127.58 ,  
127.36 , 127.12 , 126.82 , 126.50 , 125.41 , 119.35 , 64.38 , 30.68 ,  
19.98 , 19.14 , 13.72 .

**FTIR** (KBr, cm<sup>-1</sup>)

2956.02, 2925.70, 2852.24, 1700.81, 1596.48, 1366.13, 1285.36,  
1163.94, 744.50,

**Opt. Rot.** [ $\alpha$ ]<sup>20</sup><sub>D</sub> = -56.2 (c = 0.47, CHCl<sub>3</sub>)

**HPLC** Daicel Chiralpak AD-H column, n-hexane/i-PrOH (60/40), 1 mL/min,  
254 nm, 4.164 min (major enantiomer), 5.654 min (minor enantiomer).

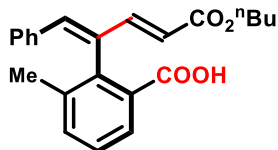

**2-((1Z,3E)-5-butoxy-5-oxo-1-phenylpenta-1,3-dien-2-yl)-3-methylbenzoic acid (4c)**

Following the General procedure with **3c** (0.1 mmol), **4c** was obtained as a yellow liquid (32.1 mg, 88% yield, 94% *ee*).

**<sup>1</sup>H NMR** (500 MHz, CDCl<sub>3</sub>)

$\delta$  8.01 (d, *J* = 7.6 Hz, 1H), 7.71 (d, *J* = 15.5 Hz, 1H), 7.48 (d, *J* = 7.4 Hz, 1H), 7.40 (t, *J* = 7.7 Hz, 1H), 7.15 – 7.07 (m, 3H), 6.98 (s, 1H), 6.84 (d, *J* = 7.0 Hz, 2H), 5.19 (d, *J* = 15.5 Hz, 1H), 4.10 (t, *J* = 6.7 Hz, 2H), 2.05 (s, 3H), 1.61 (dt, *J* = 14.7, 6.8 Hz, 2H), 1.37 (dq, *J* = 14.1, 7.1 Hz, 2H), 0.91 (t, *J* = 7.4 Hz, 3H).

**<sup>13</sup>C NMR** (125 MHz, CDCl<sub>3</sub>)

$\delta$  171.14 , 167.51 , 149.03 , 138.17 , 137.89 , 137.33 , 137.27 , 135.88 ,  
135.52 , 129.69 , 129.42 , 129.13 , 128.43 , 128.29 , 128.05 , 118.22 ,  
64.34 , 30.71 , 19.52 , 19.18 , 13.75.

**FTIR** (KBr,  $\text{cm}^{-1}$ )

2829.57, 1598.47, 1365.25, 1068.74, 774.96,

**Opt. Rot.**  $[\alpha]^{20}_{\text{D}} = -36.0$  ( $c = 0.04$ ,  $\text{CHCl}_3$ )

**HPLC** Daicel Chiralpak AD-H column, n-hexane/i-PrOH (60/40), 1 mL/min, 254 nm, 5.263min (major enantiomer), 11.326 min (minor enantiomer).

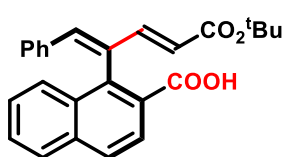

**1-((1Z,3E)-5-(tert-butoxy)-5-oxo-1-phenylpenta-1,3-dien-2-yl)-2-naphthoic acid (4d)**

Following the General procedure with **3d** (0.1 mmol), **4d** was obtained as a yellow liquid (36.8 mg, 92% yield, 88% *ee*).

**<sup>1</sup>H NMR** (500 MHz,  $\text{CDCl}_3$ )

$\delta$  8.17 (d,  $J = 8.7$  Hz, 1H), 7.97 (d,  $J = 8.7$  Hz, 1H), 7.90 (t,  $J = 9.0$  Hz, 2H), 7.80 (d,  $J = 15.5$  Hz, 1H), 7.57 (t,  $J = 7.5$  Hz, 1H), 7.42 (t,  $J = 7.7$  Hz, 1H), 7.24 (d,  $J = 17.0$  Hz, 1H), 7.02 (t,  $J = 7.3$  Hz, 1H), 6.96 (t,  $J = 7.6$  Hz, 2H), 6.72 (d,  $J = 7.5$  Hz, 2H), 4.98 (d,  $J = 15.5$  Hz, 1H), 1.41 (s, 9H).

**<sup>13</sup>C NMR** (125 MHz,  $\text{CDCl}_3$ )

$\delta$  170.70, 166.62, 148.56, 139.06, 138.59, 136.09, 135.75, 135.57, 130.88, 129.29, 128.57, 128.31, 128.18, 128.15, 127.49, 127.10, 126.80, 126.29, 121.22, 80.31, 28.12.

**FTIR** (KBr,  $\text{cm}^{-1}$ )

2920.76, 1699.40, 1464.68, 1311.87, 1261.43, 1149.74, 1021.29, 804.21, 441.69

**Opt. Rot.**  $[\alpha]^{20}_{\text{D}} = -45.1$  ( $c = 0.06$ ,  $\text{CHCl}_3$ )

**HPLC** Daicel Chiralpak AD-H column, n-hexane/i-PrOH (60/40), 1 mL/min, 254 nm, 5.489min (major enantiomer), 23.947 min (minor enantiomer).

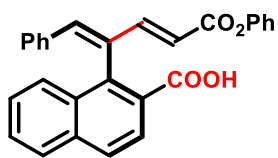

**1-((1Z,3E)-5-oxo-5-phenoxy-1-phenylpenta-1,3-dien-2-yl)-2-naphthoic acid (4e)**

Following the General procedure with **3e** (0.1 mmol), **4e** was obtained as a yellow liquid (36.1 mg, 86% yield, 90% *ee*).

**<sup>1</sup>H NMR** (500 MHz, CDCl<sub>3</sub>)

δ 8.22 (d, *J* = 8.7 Hz, 1H), 8.09 (d, *J* = 15.5 Hz, 1H), 8.01 (d, *J* = 8.7 Hz, 1H), 7.93 (t, *J* = 7.6 Hz, 2H), 7.60 (t, *J* = 7.5 Hz, 1H), 7.50 – 7.45 (m, 1H), 7.35 – 7.28 (m, 3H), 7.17 (t, *J* = 7.4 Hz, 1H), 7.05 (d, *J* = 7.9 Hz, 3H), 6.99 (t, *J* = 7.5 Hz, 2H), 6.76 (d, *J* = 7.6 Hz, 2H), 5.25 (d, *J* = 15.5 Hz, 1H).

**<sup>13</sup>C NMR** (125 MHz, CDCl<sub>3</sub>)

δ 170.82 , 165.66 , 151.41 , 150.73 , 140.59 , 138.20 , 135.95 , 135.84 , 135.31 , 130.81 , 129.53 , 129.32 , 128.84 , 128.74 , 128.59 , 128.43 , 128.34 , 127.69 , 126.87 , 126.85 , 126.32 , 125.61 , 121.60 , 118.30 .

**HRMS (ESI)** for C<sub>28</sub>H<sub>20</sub>O<sub>4</sub>Na [M+Na]<sup>+</sup>: 443.1254, found: 443.1247; for C<sub>28</sub>H<sub>20</sub>O<sub>4</sub> K [M+K]<sup>+</sup>: 459.0993, found: 459.2989.

**FTIR** (KBr, cm<sup>-1</sup>)

3433.27, 2925.12, 2830.89, 1715.79, 1592.59, 1363.77, 1124.14, 775.87

**Opt. Rot.** [α]<sup>20</sup><sub>D</sub> = -60.2 (c = 0.06, CHCl<sub>3</sub>)

**HPLC** Daicel Chiralpak AD-H column, n-hexane/*i*-PrOH (60/40), 1 mL/min, 254 nm, 7.887min (major enantiomer), 9.044 min (minor enantiomer).

## 5.2 Application of **4** as CCA for Co<sup>III</sup>-catalyzed enantioselective **1**, **4**-addition of indole and maleimides

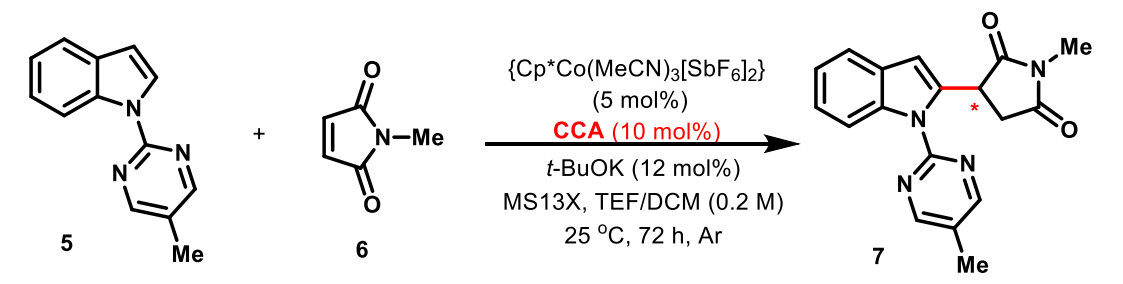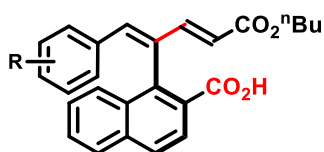

R = 4-F, **4a**, 71%, 74: 26 er  
R = 2-Me, **4b**, 41%, 90:10 er

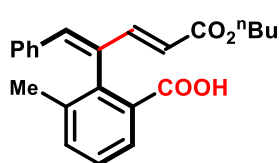

**4c**, 44%, 87:13 dr

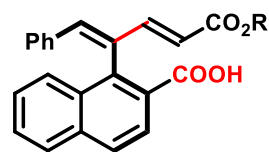

R = <sup>t</sup>Bu, **4d**, 40%, 92: 8 er  
R = Ph, **4e**, 41%, 83:17 er

To an oven-dried 25 mL Schlenk tube was added N-5-methyl-pyrimidyl indole **5** (0.20 mmol, 1.0 equiv), maleimide **6** (0.4 mmol, 2 equiv), CCA (0.02 mmol, 10 mol %),  $[\text{Cp}^*\text{Co}(\text{MeCN})_3][\text{SbF}_6]_2$  (0.01 mmol), activated MS13X (40 mg). To the mixture were added *t*-BuOK in TFE (0.1 M, 240  $\mu\text{L}$ , 0.024 mmol, 12 mol %), TFE (560  $\mu\text{L}$ ), and DCM (200  $\mu\text{L}$ ) at 0 °C, and the mixture was stirred at 25 °C. After 72 hours, the reaction mixture was filtered through a short pad of silica gel and purified by silica gel column chromatography (petroleum ether/ethyl acetate = 10/1 to 2/1) to afford **7** as white solid.

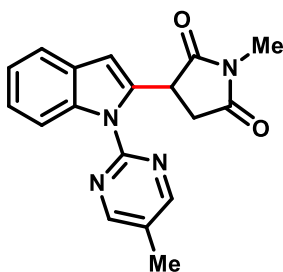

**1-methyl-3-(1-(5-methylpyrimidin-2-yl)-1H-indol-2-yl)pyrrolidine-2,5-dione (7)**

**<sup>1</sup>H NMR** (500 MHz,  $\text{CDCl}_3$ )

$\delta$  8.55 (d,  $J = 7.8$  Hz, 1H), 8.43 (s, 2H), 7.56 (d,  $J = 7.1$  Hz, 1H), 7.31 (t,

$J = 7.0$  Hz, 1H), 7.23 (q,  $J = 9.1, 6.8$  Hz, 1H), 6.67 (s, 1H), 4.77 (s, 1H), 3.17 – 3.05 (m, 4H), 2.97 – 2.84 (m, 1H), 2.30 (s, 3H).

**<sup>13</sup>C NMR** (125 MHz, CDCl<sub>3</sub>)

$\delta$  175.99 , 175.44 , 156.71 , 154.84 , 136.26 , 132.53 , 127.52 , 125.21 , 122.96 , 121.29 , 119.30 , 114.48 , 109.57 , 41.18 , 35.50 , 24.05 , 14.02 .

**HRMS (ESI)** for C<sub>18</sub>H<sub>16</sub>O<sub>2</sub>N<sub>4</sub> H [M+ H]<sup>+</sup>: 321.1346, found: 321.1137.

**FTIR** 2925.20, 2828.58, 1699.93, 1591.69, 1365.93, 775.34

**HPLC** Daicel Chiralpak IA column, n-hexane/i-PrOH (80/20), 1.0 mL/min, 254 nm, 17.130 min (major enantiomer), 37.385 min (minor enantiomer).

## 6. Density Functional Theory (DFT) Calculations

### 6.1 Computational Details and Rotational Barrier Calculated by DFT

All density functional theory (DFT) calculations were carried out using Gaussian16 software package.<sup>6</sup> All geometry optimizations were performed with B3LYP<sup>7,8</sup>-D3<sup>9</sup> functional and 6-31G (d) basis set. The vibrational frequencies were computed at the same level of theory as for the geometry optimizations, and to evaluate the zero-point vibrational energy (ZPVE) and thermal corrections at 298 K. The single-point energies were computed based on the gas-phase optimized structures, using M06-2x<sup>10</sup> functional and 6-311+G (d, p) basis set, with the inclusion of solvation energy corrections using a self-consistent reaction field (SCRF) based on SMD implicit solvent model<sup>11</sup> with DMSO as solvent. Free energies were corrected using Truhlar's quasiharmonic correction, by raising vibrational frequencies that are below 100 cm<sup>-1</sup>.<sup>12</sup> All reported energies were computed at 298.15K. DFT-optimized structures are illustrated using CYLView.

## 6.2 Enantiomeric conversion half-life calculation strategy

The Eyring Equation relates the activation free energy and rate constant:

$$k = \frac{\kappa k_B T}{h} e^{-\frac{\Delta G^\ddagger}{RT}} \quad (1)$$

In this equation,  $\Delta G^\ddagger$  is the Gibbs energy of activation,  $\kappa$  is the transmission coefficient,  $k_B$  is Boltzmann's constant, and  $h$  is Planck's constant. The transmission coefficient is often assumed to be equal to one as it reflects what fraction of the flux through the transition state proceeds to the product without recrossing the transition state.

The epimerization of atropisomer is a first order reaction, which makes the half-life only relates to the reaction rate constant:

$$t_{1/2} = \ln 2 / k \quad (2)$$

Based on Equations 1 and 2, the half-life at 40 °C (reaction conditions) and 25 °C (room temperature) was calculated.

Table of Energies and Figures

| Structure    | E            | ZPE      | H            | T.S      | T.qh-S   | G(T)         | qh-G(T)      |
|--------------|--------------|----------|--------------|----------|----------|--------------|--------------|
| <b>3a-TS</b> | -1230.900357 | 0.424751 | -1230.448927 | 0.084702 | 0.079159 | -1230.533629 | -1230.528086 |
| <b>3a</b>    | -1230.951443 | 0.425198 | -1230.498427 | 0.089616 | 0.082197 | -1230.588043 | -1230.580623 |
| <b>3e-TS</b> | -1132.389275 | 0.379813 | -1131.984727 | 0.080054 | 0.07509  | -1132.064781 | -1132.059816 |
| <b>3e</b>    | -1132.441378 | 0.380453 | -1132.035128 | 0.084468 | 0.077903 | -1132.119596 | -1132.113031 |
| <b>5a-TS</b> | -924.823022  | 0.355135 | -924.445535  | 0.075135 | 0.070643 | -924.52067   | -924.516178  |
| <b>5a</b>    | -924.872508  | 0.354131 | -924.494676  | 0.078712 | 0.073626 | -924.573388  | -924.568301  |
| <b>5e-TS</b> | -806.868959  | 0.271208 | -806.57951   | 0.064238 | 0.061691 | -806.643748  | -806.641201  |
| <b>5e</b>    | -806.918472  | 0.270186 | -806.628684  | 0.067808 | 0.064679 | -806.696492  | -806.693363  |

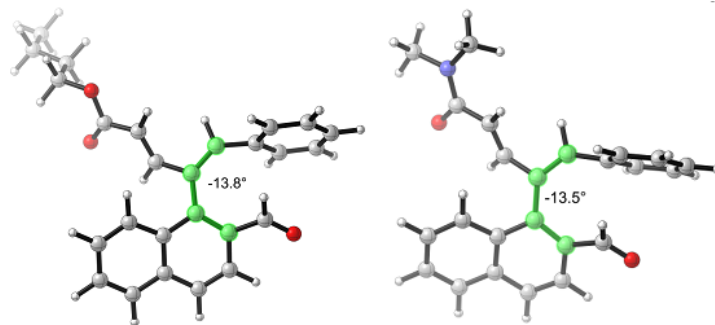

**3a-TS**  
 $\Delta G^\ddagger = 30.5$  kcal/mol  
 $t_{1/2}$  (25 °C) = 82 yrs  
 $t_{1/2}$  (40 °C) = 6 yrs

**3e-TS**  
 $\Delta G^\ddagger = 30.9$  kcal/mol  
 $t_{1/2}$  (25 °C) = 162 yrs  
 $t_{1/2}$  (40 °C) = 12 yrs

**3a-TS**

|   |           |           |           |
|---|-----------|-----------|-----------|
| C | 3.068020  | 0.863098  | 0.340311  |
| C | 3.702557  | 1.971635  | 0.963444  |
| C | 3.085489  | 3.187123  | 1.080181  |
| C | 1.846510  | 3.402742  | 0.428702  |
| C | 1.184122  | 2.295842  | -0.203920 |
| C | 1.722293  | 0.950733  | -0.074688 |
| C | 0.769961  | -0.208491 | -0.202660 |
| C | 0.979685  | -1.554750 | -0.212278 |
| C | -0.673994 | 0.133093  | -0.045658 |
| C | -1.700405 | -0.430596 | -0.703942 |
| C | 2.173994  | -2.429728 | -0.165435 |
| C | 2.784067  | -2.719205 | 1.063509  |
| C | 3.861822  | -3.602523 | 1.125490  |
| C | 4.328860  | -4.222258 | -0.033716 |
| C | 3.706214  | -3.963163 | -1.257444 |
| C | 2.629699  | -3.079380 | -1.322961 |
| C | -3.088717 | -0.047972 | -0.376832 |
| O | -3.421065 | 0.775207  | 0.457079  |
| O | -3.964842 | -0.737135 | -1.150414 |
| C | -7.956654 | -1.786849 | 1.679578  |
| C | -7.407079 | -1.016586 | 0.474737  |
| C | -5.902865 | -1.237026 | 0.273561  |
| C | -5.366046 | -0.464382 | -0.926367 |
| H | 4.710951  | 1.811280  | 1.330660  |
| H | 3.570778  | 4.013522  | 1.593116  |
| H | 0.063127  | -2.141079 | -0.178372 |
| H | -0.923013 | 0.886749  | 0.698448  |
| H | -1.557133 | -1.153767 | -1.501058 |
| H | 2.426926  | -2.228003 | 1.964106  |
| H | 4.341931  | -3.797840 | 2.080042  |
| H | 5.172890  | -4.904409 | 0.014585  |
| H | 4.061411  | -4.447496 | -2.163080 |
| H | 2.148303  | -2.873163 | -2.275280 |
| H | -9.030976 | -1.613979 | 1.808736  |
| H | -7.802163 | -2.866277 | 1.560735  |
| H | -7.453202 | -1.479628 | 2.604116  |
| H | -7.602313 | 0.056962  | 0.605421  |
| H | -7.947870 | -1.319687 | -0.433387 |
| H | -5.694308 | -2.305565 | 0.129720  |
| H | -5.355277 | -0.915272 | 1.166747  |
| H | -5.857461 | -0.776194 | -1.852505 |
| H | -5.504359 | 0.612618  | -0.789206 |
| C | 4.025697  | -0.234665 | 0.007694  |



|   |           |           |           |
|---|-----------|-----------|-----------|
| O | 5.090143  | -0.397277 | 0.577763  |
| H | 3.779305  | -0.815107 | -0.893230 |
| C | 0.054811  | 2.607554  | -1.016458 |
| C | -0.442074 | 3.888842  | -1.111804 |
| H | -1.295191 | 4.084097  | -1.755187 |
| C | 0.156490  | 4.948979  | -0.395114 |
| H | -0.256081 | 5.951856  | -0.459210 |
| H | -0.403610 | 1.829617  | -1.611282 |
| C | 1.287267  | 4.705896  | 0.347976  |
| H | 1.795106  | 5.516645  | 0.864500  |

**3a**

|   |           |           |           |
|---|-----------|-----------|-----------|
| C | -1.597297 | 1.533696  | -0.316131 |
| C | -1.963777 | 2.735067  | 0.376568  |
| C | -1.800842 | 2.803092  | 1.788633  |
| C | -1.294448 | 1.738755  | 2.485095  |
| C | -0.927622 | 0.541288  | 1.811256  |
| C | -1.084191 | 0.425810  | 0.432447  |
| C | -0.683229 | -0.823799 | -0.289810 |
| C | -1.541871 | -1.822665 | -0.635920 |
| C | 0.713805  | -0.948347 | -0.677935 |
| C | 1.687968  | -0.049646 | -0.427602 |
| C | -2.976765 | -1.993928 | -0.417994 |
| C | -3.582639 | -3.126583 | -1.003224 |
| C | -4.943933 | -3.377524 | -0.861942 |
| C | -5.741002 | -2.500665 | -0.123513 |
| C | -5.159753 | -1.376790 | 0.469806  |
| C | -3.799042 | -1.122266 | 0.328096  |
| C | 3.066525  | -0.310314 | -0.883224 |
| O | 3.437407  | -1.296874 | -1.495840 |
| O | 3.884592  | 0.710821  | -0.527603 |
| C | 8.298169  | -1.269014 | 0.751154  |
| C | 7.527112  | -0.389299 | -0.238084 |
| C | 6.032894  | -0.301802 | 0.095593  |
| C | 5.274897  | 0.574696  | -0.895585 |
| H | -2.083269 | 3.717690  | 2.304288  |
| H | -1.089082 | -2.648711 | -1.184726 |
| H | 0.998096  | -1.849288 | -1.220427 |
| H | 1.504339  | 0.876679  | 0.105793  |
| H | -2.968458 | -3.815280 | -1.578777 |
| H | -5.381875 | -4.257024 | -1.325849 |
| H | -6.804310 | -2.691990 | -0.008326 |
| H | -5.771192 | -0.691661 | 1.050664  |
| H | -3.376966 | -0.248350 | 0.804926  |

|   |           |           |           |
|---|-----------|-----------|-----------|
| H | 9.362232  | -1.321767 | 0.494600  |
| H | 8.217859  | -0.876731 | 1.772297  |
| H | 7.902604  | -2.291816 | 0.757061  |
| H | 7.649467  | -0.786722 | -1.255382 |
| H | 7.961413  | 0.620817  | -0.247785 |
| H | 5.895163  | 0.105029  | 1.106158  |
| H | 5.588057  | -1.303405 | 0.084289  |
| H | 5.659577  | 1.598615  | -0.896262 |
| H | 5.339819  | 0.163897  | -1.907990 |
| C | -0.393547 | -0.579065 | 2.625526  |
| O | -0.238491 | -0.519431 | 3.832368  |
| H | -0.137262 | -1.499586 | 2.066745  |
| H | -1.159200 | 1.771800  | 3.561284  |
| C | -1.768920 | 1.482467  | -1.726806 |
| C | -2.273810 | 2.561310  | -2.416961 |
| H | -2.396963 | 2.504658  | -3.494782 |
| C | -2.634797 | 3.745525  | -1.731377 |
| H | -3.032933 | 4.589913  | -2.287277 |
| H | -1.496707 | 0.575718  | -2.255743 |
| C | -2.482364 | 3.827757  | -0.365289 |
| H | -2.757601 | 4.734866  | 0.167164  |

### 3e-TS

|   |           |           |           |
|---|-----------|-----------|-----------|
| C | 1.968817  | 1.542232  | 0.085942  |
| C | 2.263916  | 2.871801  | 0.491857  |
| C | 1.291291  | 3.827626  | 0.599299  |
| C | -0.020615 | 3.538389  | 0.151345  |
| C | -0.344775 | 2.199646  | -0.259309 |
| C | 0.632243  | 1.131852  | -0.106906 |
| C | 0.127584  | -0.281072 | 0.033789  |
| C | 0.786237  | -1.470880 | 0.118417  |
| C | -1.318598 | -0.409580 | 0.378104  |
| C | -2.153170 | -1.360653 | -0.071910 |
| C | 2.200514  | -1.900912 | 0.018136  |
| C | 3.035883  | -1.840595 | 1.142709  |
| C | 4.346464  | -2.313344 | 1.075194  |
| C | 4.830866  | -2.872693 | -0.107454 |
| C | 3.995044  | -2.966130 | -1.223204 |
| C | 2.685784  | -2.490595 | -1.159507 |
| C | -3.575029 | -1.364867 | 0.381053  |
| O | -4.063741 | -0.382435 | 0.942885  |
| H | 3.304768  | 3.097669  | 0.699178  |
| H | 1.528547  | 4.829983  | 0.946659  |
| H | 0.141085  | -2.307848 | 0.380202  |

|   |           |           |           |
|---|-----------|-----------|-----------|
| H | -1.733365 | 0.320033  | 1.069441  |
| H | -1.814467 | -2.073911 | -0.816983 |
| H | 2.661993  | -1.394702 | 2.059949  |
| H | 4.991381  | -2.234955 | 1.945740  |
| H | 5.853818  | -3.234397 | -0.160966 |
| H | 4.364618  | -3.405664 | -2.145846 |
| H | 2.037202  | -2.555321 | -2.029275 |
| C | 3.193091  | 0.776674  | -0.296515 |
| O | 4.310618  | 1.039965  | 0.112024  |
| H | 3.051001  | 0.034727  | -1.095526 |
| C | -1.613276 | 2.015262  | -0.883674 |
| C | -2.525628 | 3.040782  | -0.997834 |
| H | -3.476672 | 2.854999  | -1.488166 |
| C | -2.231368 | 4.326925  | -0.493628 |
| H | -2.966076 | 5.123627  | -0.568849 |
| H | -1.861421 | 1.055455  | -1.314016 |
| C | -0.994835 | 4.567607  | 0.056565  |
| H | -0.727568 | 5.562323  | 0.404730  |
| N | -4.318993 | -2.495512 | 0.118075  |
| C | -5.750055 | -2.476877 | 0.382833  |
| H | -6.310980 | -2.707888 | -0.532871 |
| H | -6.013867 | -3.220811 | 1.146360  |
| H | -6.024088 | -1.485016 | 0.739387  |
| C | -3.791323 | -3.729829 | -0.442852 |
| H | -4.350494 | -4.574755 | -0.026432 |
| H | -3.888682 | -3.767459 | -1.538075 |
| H | -2.743167 | -3.872352 | -0.175139 |

**3e**

|   |           |           |           |
|---|-----------|-----------|-----------|
| C | -0.697214 | 1.408376  | -0.513620 |
| C | -0.839302 | 2.746844  | -0.016916 |
| C | -0.512339 | 3.027113  | 1.339371  |
| C | -0.061363 | 2.034837  | 2.167593  |
| C | 0.076681  | 0.701996  | 1.690966  |
| C | -0.243744 | 0.378918  | 0.373964  |
| C | -0.060920 | -1.014736 | -0.144946 |
| C | -1.078592 | -1.895303 | -0.350567 |
| C | 1.293326  | -1.424818 | -0.493938 |
| C | 2.408085  | -0.683624 | -0.334419 |
| C | -2.518214 | -1.781039 | -0.120603 |
| C | -3.341852 | -2.782344 | -0.677229 |
| C | -4.724856 | -2.752736 | -0.524591 |
| C | -5.324313 | -1.722383 | 0.202467  |
| C | -4.524723 | -0.729832 | 0.775551  |

|   |           |           |           |
|---|-----------|-----------|-----------|
| C | -3.142066 | -0.754376 | 0.619357  |
| C | 3.727684  | -1.240523 | -0.742492 |
| O | 3.807513  | -2.277731 | -1.405770 |
| H | -0.624866 | 4.044874  | 1.705102  |
| H | -0.782670 | -2.851077 | -0.783342 |
| H | 1.417523  | -2.420827 | -0.916178 |
| H | 2.342182  | 0.319718  | 0.069257  |
| H | -2.882210 | -3.589707 | -1.242671 |
| H | -5.333907 | -3.534827 | -0.969636 |
| H | -6.403328 | -1.695814 | 0.327272  |
| H | -4.981120 | 0.069685  | 1.352843  |
| H | -2.546102 | 0.018714  | 1.085981  |
| C | 0.560093  | -0.329080 | 2.643223  |
| O | 0.923398  | -0.077427 | 3.779104  |
| H | 0.573106  | -1.367850 | 2.262185  |
| H | 0.197660  | 2.228261  | 3.203558  |
| C | -1.021691 | 1.151500  | -1.874134 |
| C | -1.466361 | 2.160654  | -2.698164 |
| H | -1.709196 | 1.944704  | -3.734719 |
| C | -1.610342 | 3.478827  | -2.204276 |
| H | -1.963992 | 4.266268  | -2.864171 |
| H | -0.915905 | 0.142789  | -2.256982 |
| C | -1.302179 | 3.762804  | -0.892644 |
| H | -1.408510 | 4.773860  | -0.507071 |
| N | 4.844472  | -0.536070 | -0.349301 |
| C | 4.810317  | 0.645730  | 0.504141  |
| H | 5.800430  | 0.781588  | 0.947994  |
| H | 4.560977  | 1.560076  | -0.053081 |
| H | 4.099238  | 0.527582  | 1.325926  |
| C | 6.151598  | -0.957314 | -0.832010 |
| H | 6.636900  | -0.143766 | -1.387658 |
| H | 6.802157  | -1.241451 | 0.005575  |
| H | 6.016759  | -1.815991 | -1.488238 |

## 7. References

- (1) Hemric. B.N.; Shen. K.; Wang. Q. *J. Am. Chem. Soc.* **2016**, 138, 5813–5816.
- (2) Liu. M.; Yang. P.; Karunananda. M. K.; Wang. Y.; Liu. P.; Engle. K. M. *J. Am. Chem. Soc.*, **2018**, 140, 5805.
- (3) Robert M.; Yang P.; Emre B. K.; Gerhard H. *Chem. Eur. J.* **2018**, 24, 15781–15785.
- (4) Santhosh. R.; M. Nibin. J.; Kandikere. R. P. *J. Org. Chem.* **2018**, 83, 13707–13715.
- (5) Li. J.; Chin. E.; Lu. A. S.; Chen. L. *Tetrahedron. Lett.*, **2010**, 51, 5937-5939.
- (6) M. J. Frisch, G. W. Trucks, H. B. Schlegel, G. E. Scuseria, M. A. Robb, J. R. Cheeseman, G. Scalmani, V. Barone, G. A. Petersson, H. Nakatsuji, X. Li, M. Caricato, A. V. Marenich, J. Bloino, B. G. Janesko, R. Gomperts, B. Mennucci, H. P. Hratchian, J. V. Ortiz, A. F. Izmaylov, J. L. Sonnenberg, D. Williams-Young, F. Ding, F. Lipparini, F. Egidi, J. Goings, B. Peng, A. Petrone, T. Henderson, D. Ranasinghe, V. G. Zakrzewski, J. Gao, N. Rega, G. Zheng, W. Liang, M. Hada, M. Ehara, K. Toyota, R. Fukuda, J. Hasegawa, M. Ishida, T. Nakajima, Y. Honda, O. Kitao, H. Nakai, T. Vreven, K. Throssell, J. A. Montgomery, Jr., J. E. Peralta, F. Ogliaro, M. J. Bearpark, J. J. Heyd, E. N. Brothers, K. N. Kudin, V. N. Staroverov, T. A. Keith, R. Kobayashi, J. Normand, K. Raghavachari, A. P. Rendell, J. C. Burant, S. S. Iyengar, J. Tomasi, M. Cossi, J. M. Millam, M. Klene, C. Adamo, R. Cammi, J. W. Ochterski, R. L. Martin, K. Morokuma, O. Farkas, J. B. Foresman, and D. J. *Gaussian 16*, Revision A.03, Gaussian, Inc., Wallingford CT, **2016**.
- (7) Head-Gordon, M.; Pople, J. A.; Frisch, M. MP2 energy evaluation by direct methods. *Chem. Phys. Lett.* 1988, 153, 503.
- (8) Lee, C.; Yang, W.; Parr, R. G. Development of the Colle-Salvetti correlation-energy formula into a functional of the electron density. *Phys. Rev. B: Condens. Matter Mater. Phys.* **1988**, 37, 785.

- (9) Grimme, S.; Antony, J.; Ehrlich, S.; Krieg, H. A consistent and accurate ab initio parametrization of density functional dispersion correction (DFT-D) for the 94 elements H-Pu. *J. Chem. Phys.* **2010**, *132*, 154104.
- (10) Zhao, Y.; Truhlar, D. G. The M06 suite of density functionals for main group thermochemistry, thermochemical kinetics, noncovalent interactions, excited states, and transition elements: two new functionals and systematic testing of four M06-class functionals and 12 other functionals. *Theor. Chem. Acc.* **2008**, *120*, 215.
- (11) Marenich, A. V.; Cramer, C. J.; Truhlar, D. G. Universal Solvation Model Based on Solute Electron Density and on a Continuum Model of the Solvent Defined by the Bulk Dielectric Constant and Atomic Surface Tensions. *J. Phys. Chem. B.* **2009**, *113*, 6378.
- (12) Roothaan, C. C. New developments in molecular orbital theory. *Rev. Mod. Phys.* **1951**, *23*, 69–89.

## 8. NMR Charts

### 8.1 $^1\text{H} / ^{13}\text{C}$ NMR Charts of The Substrates

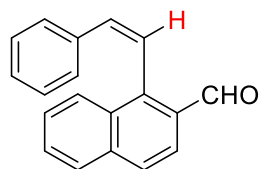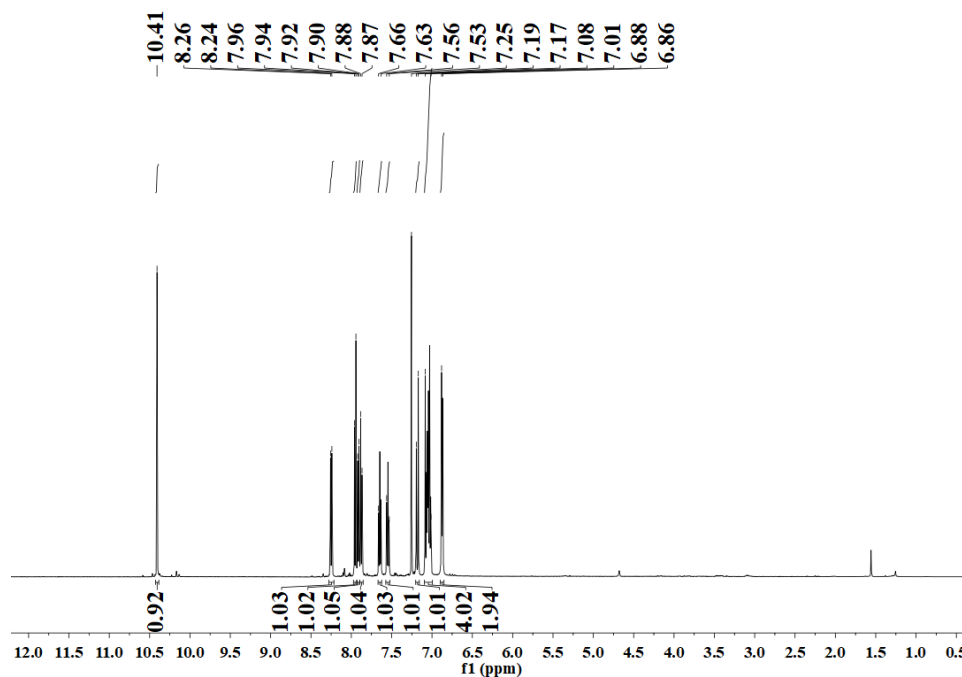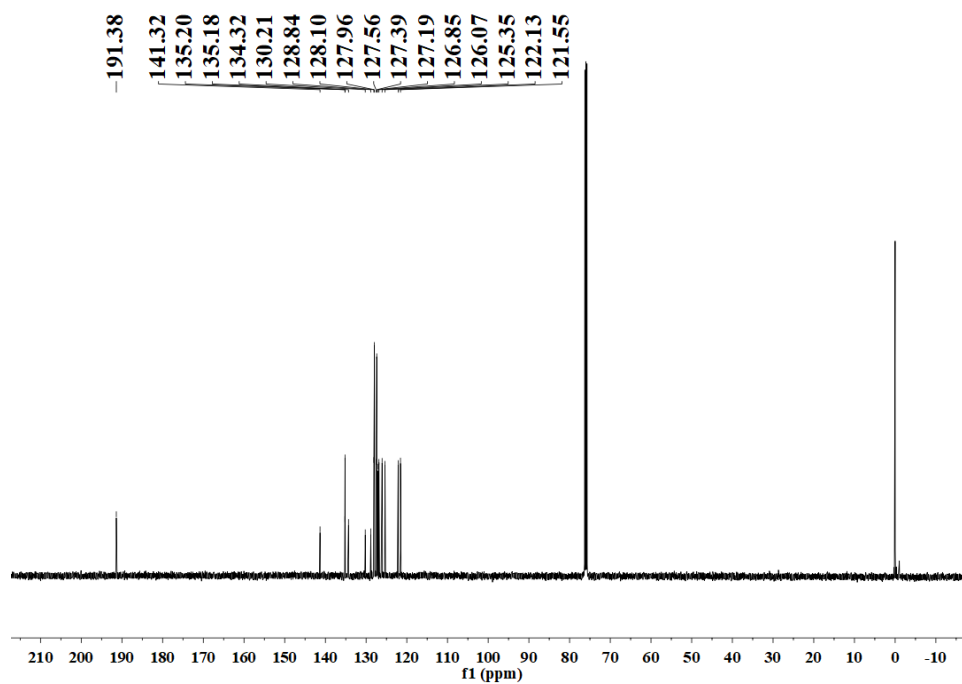

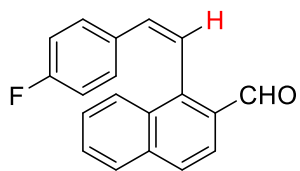

(1f)

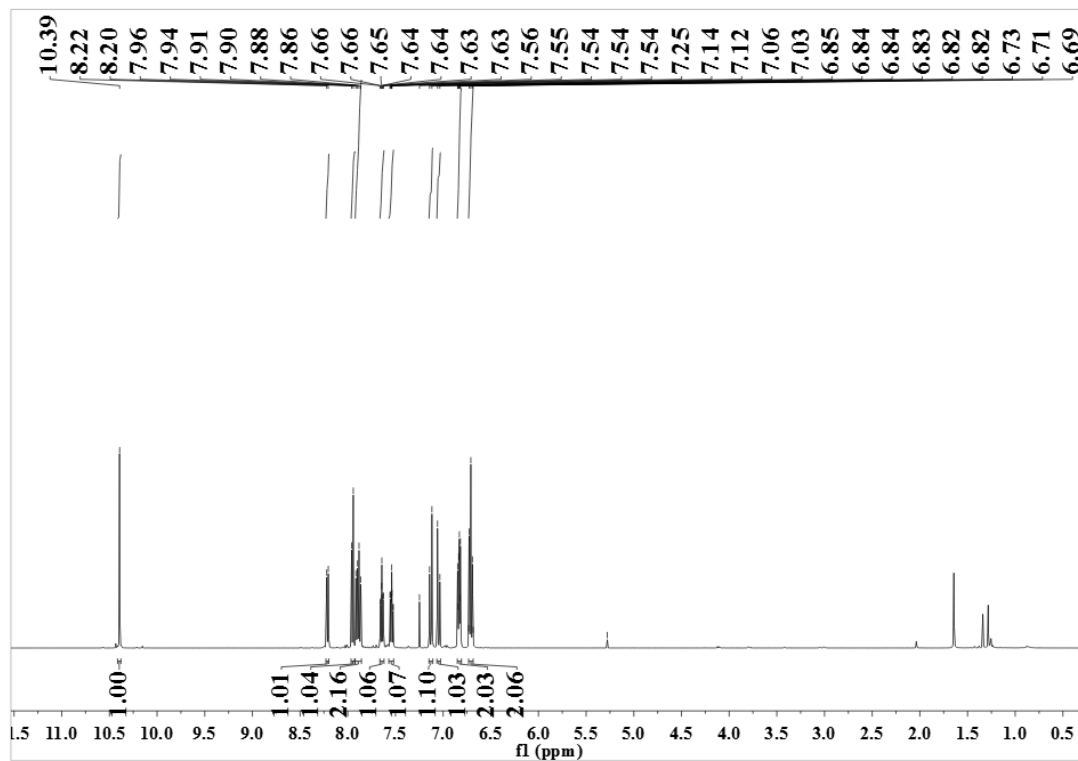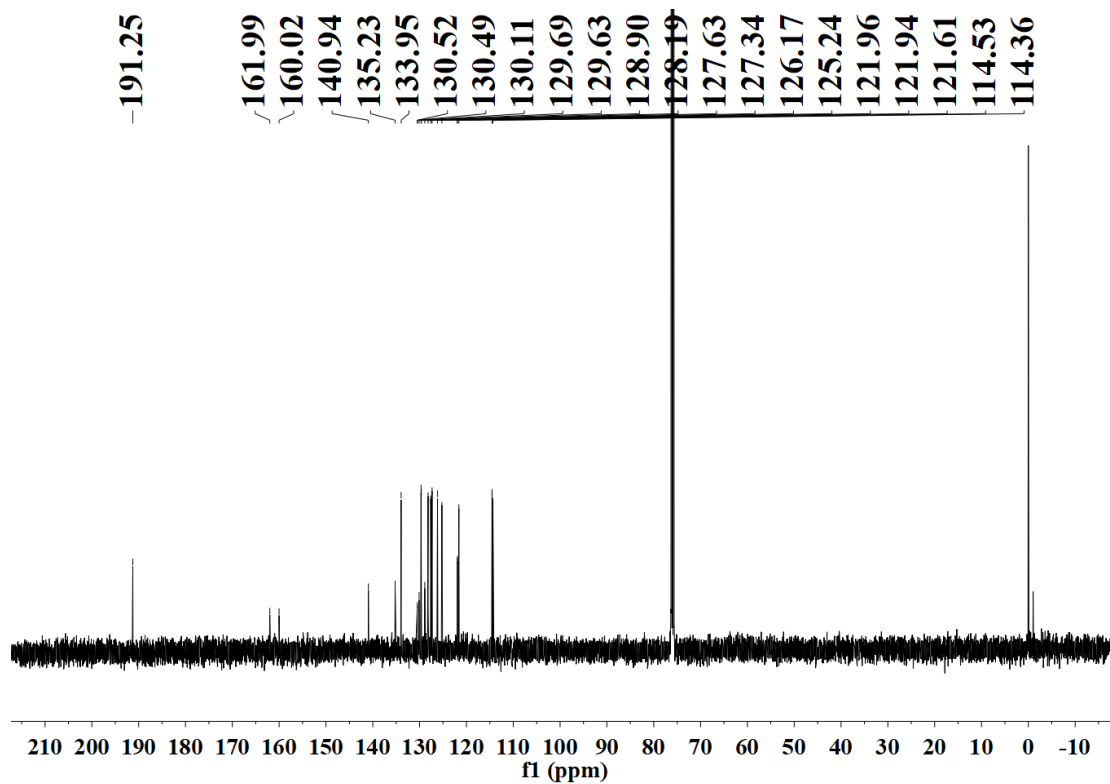



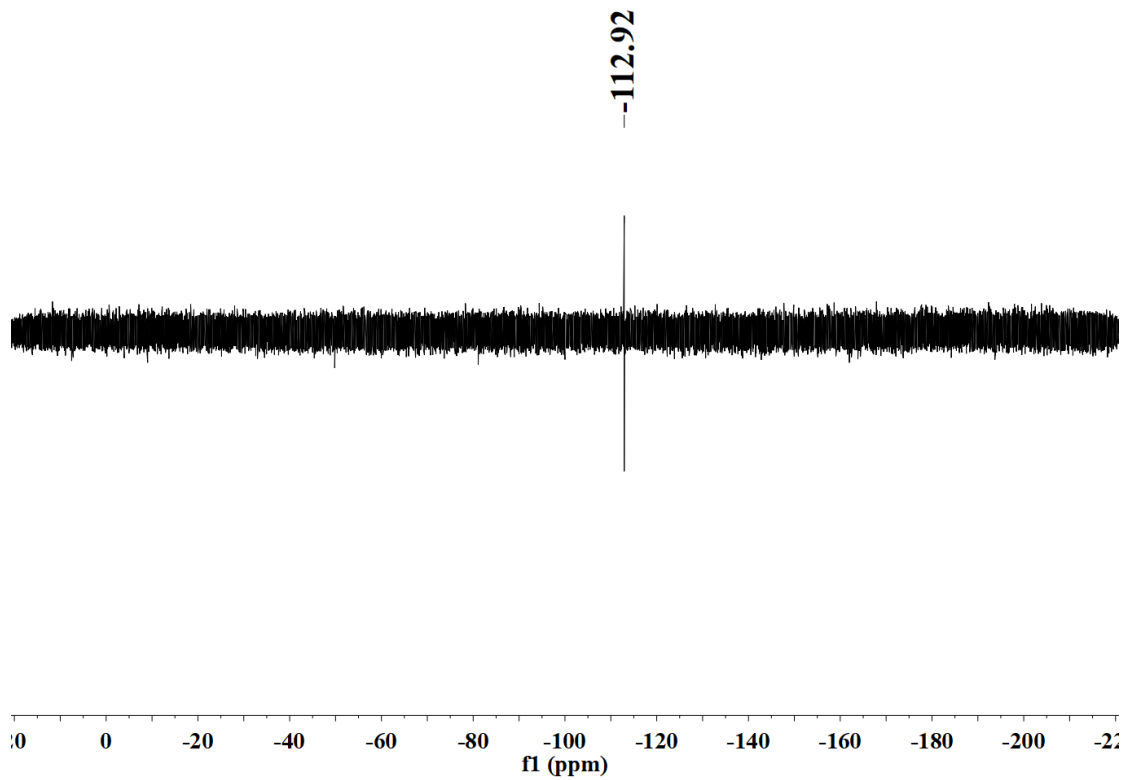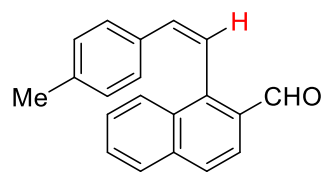

(1g)

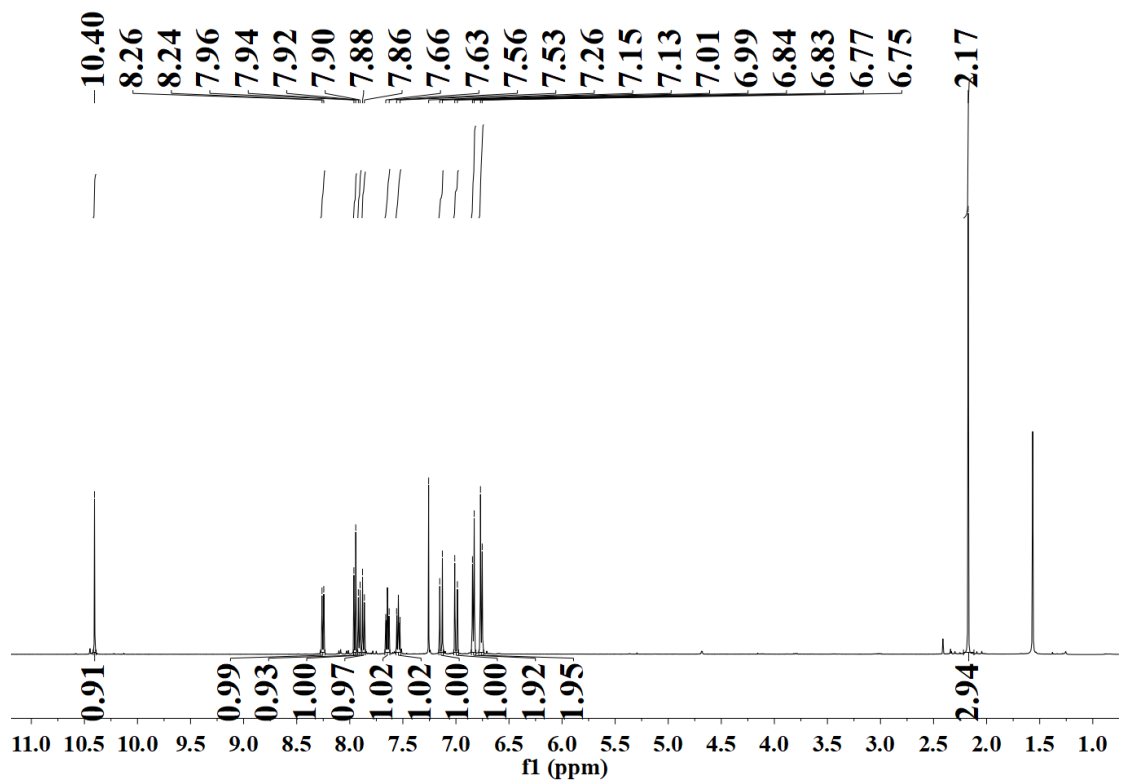

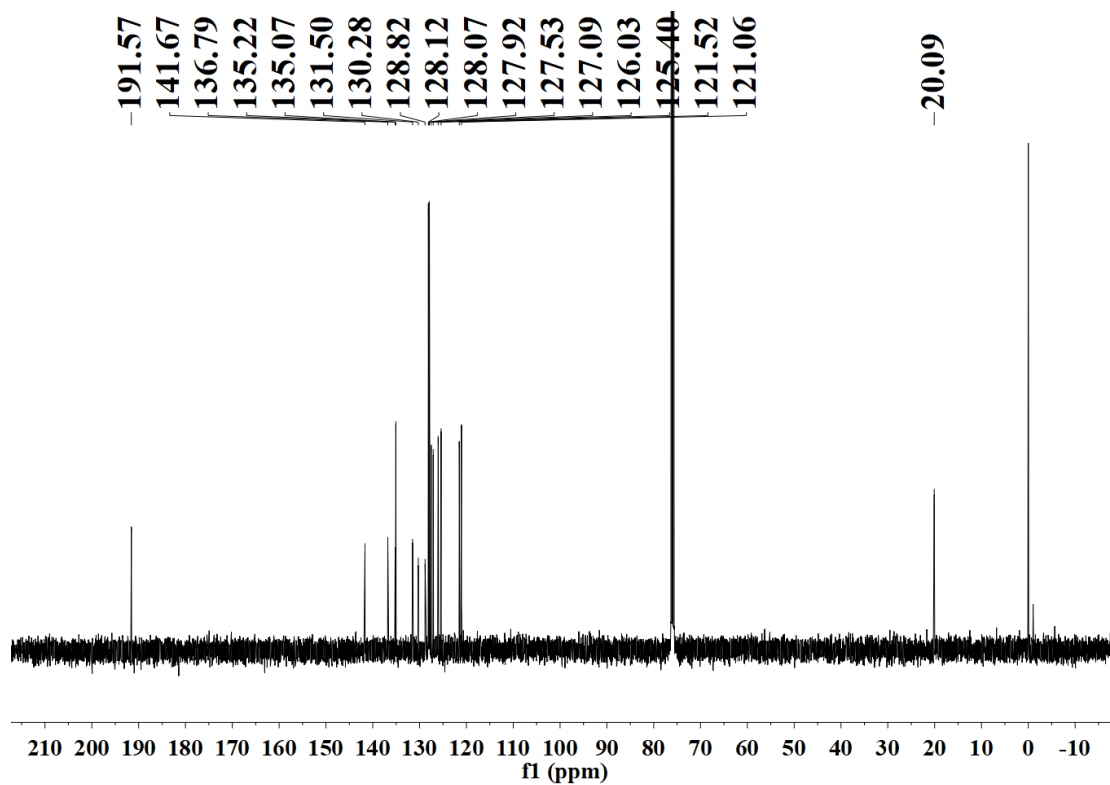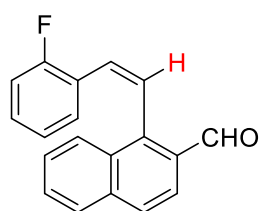

(1h)

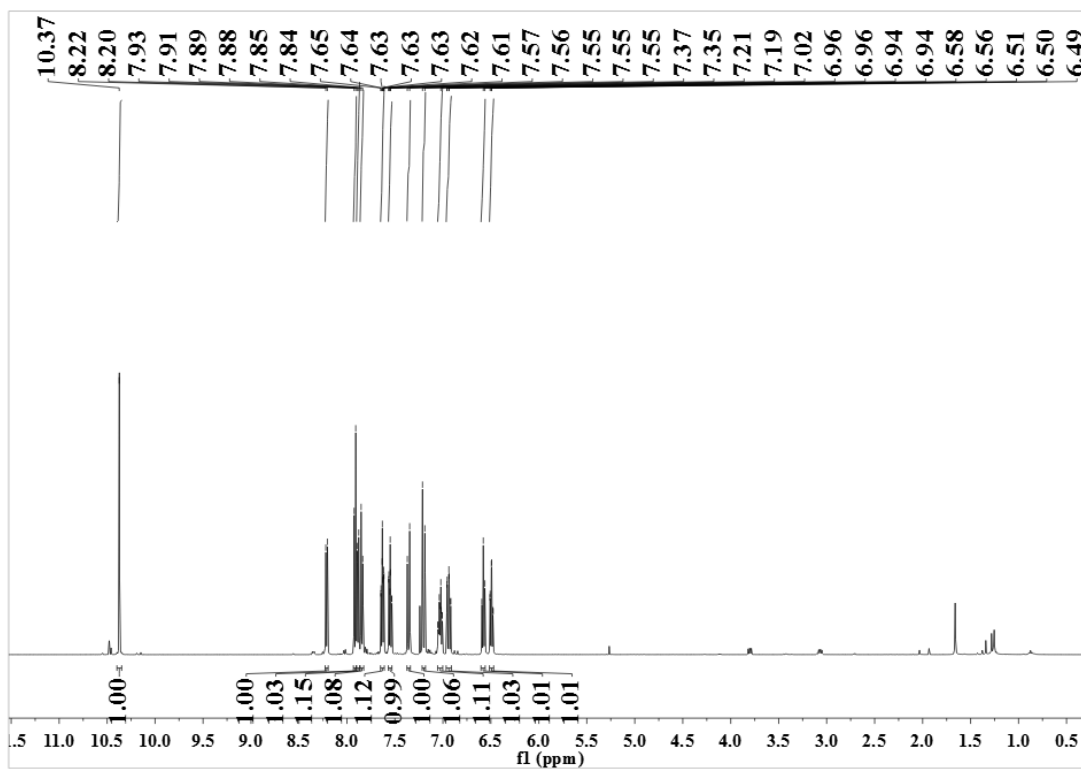

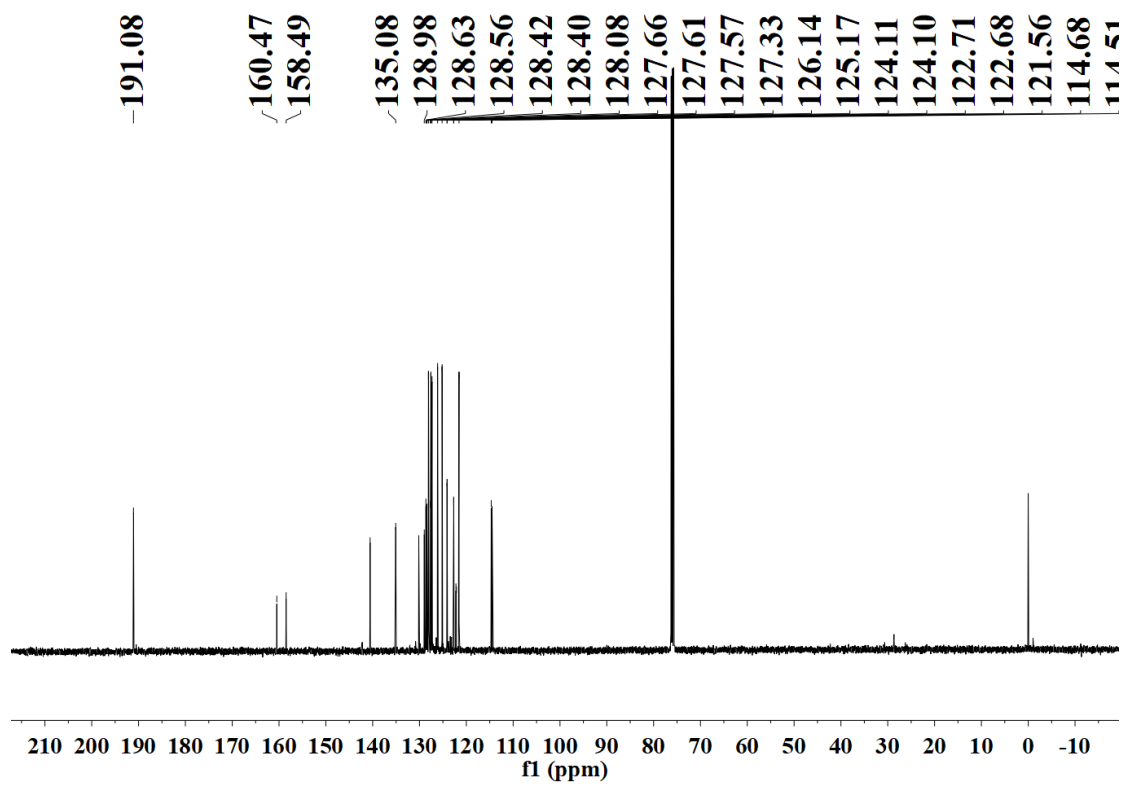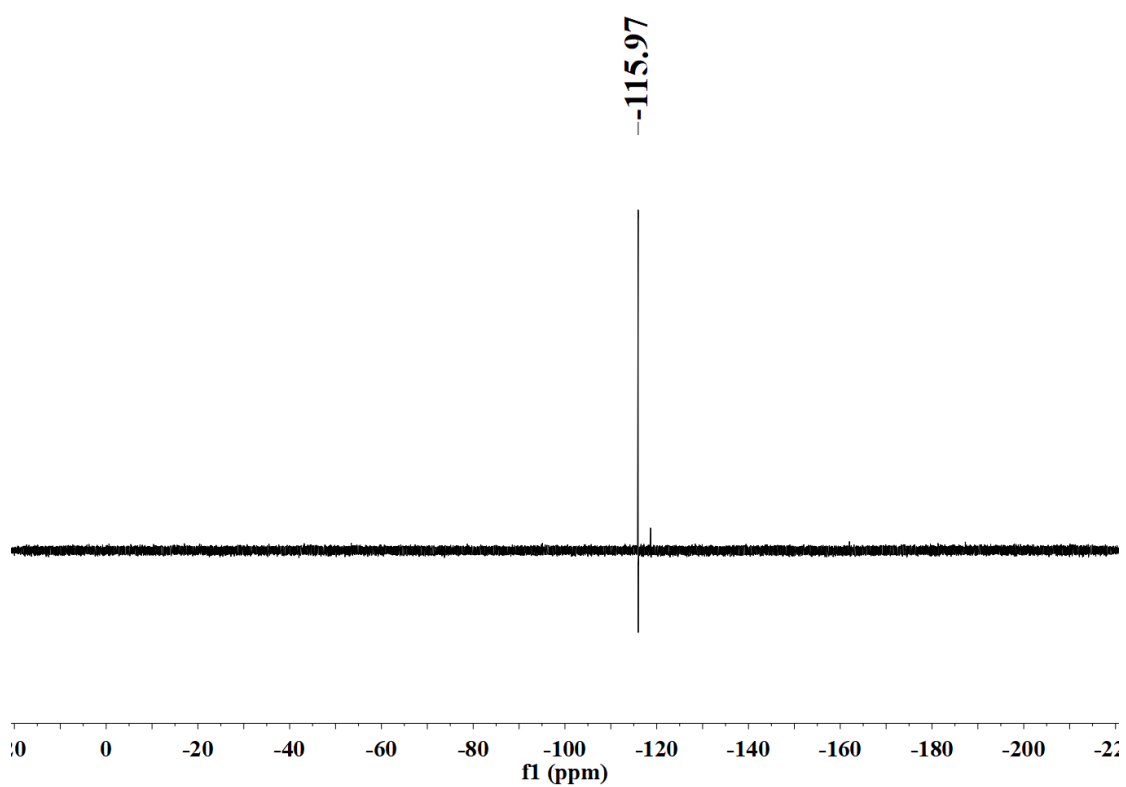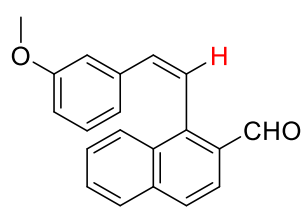

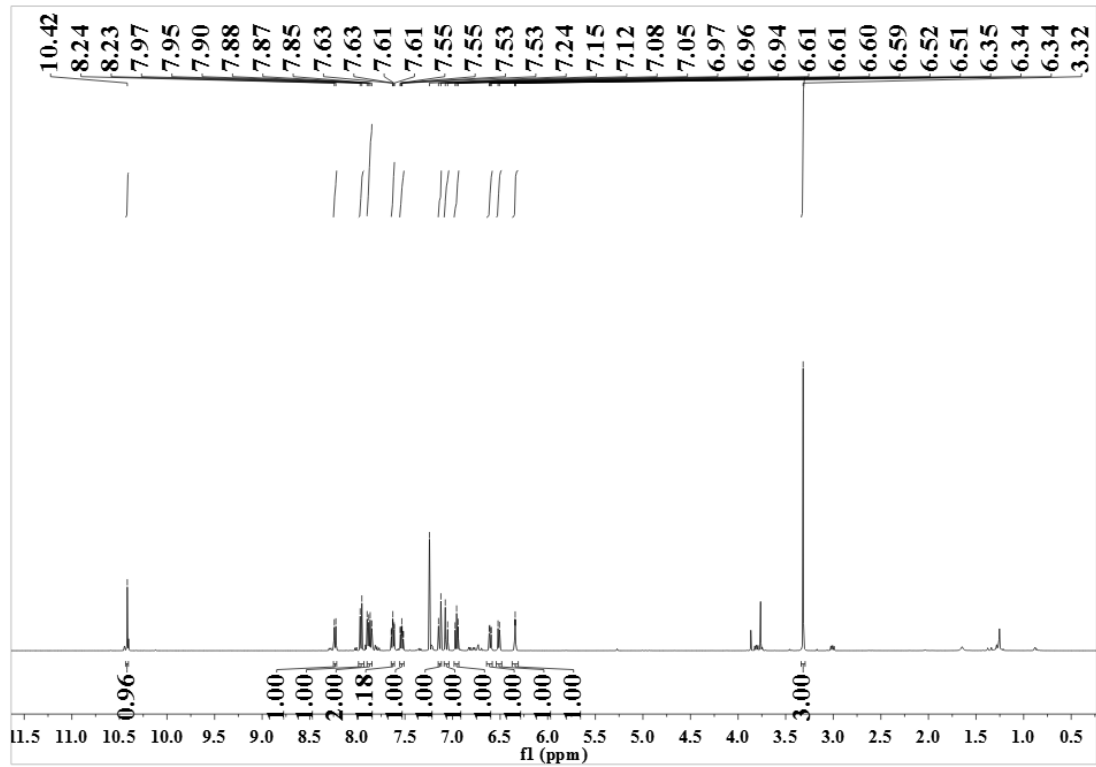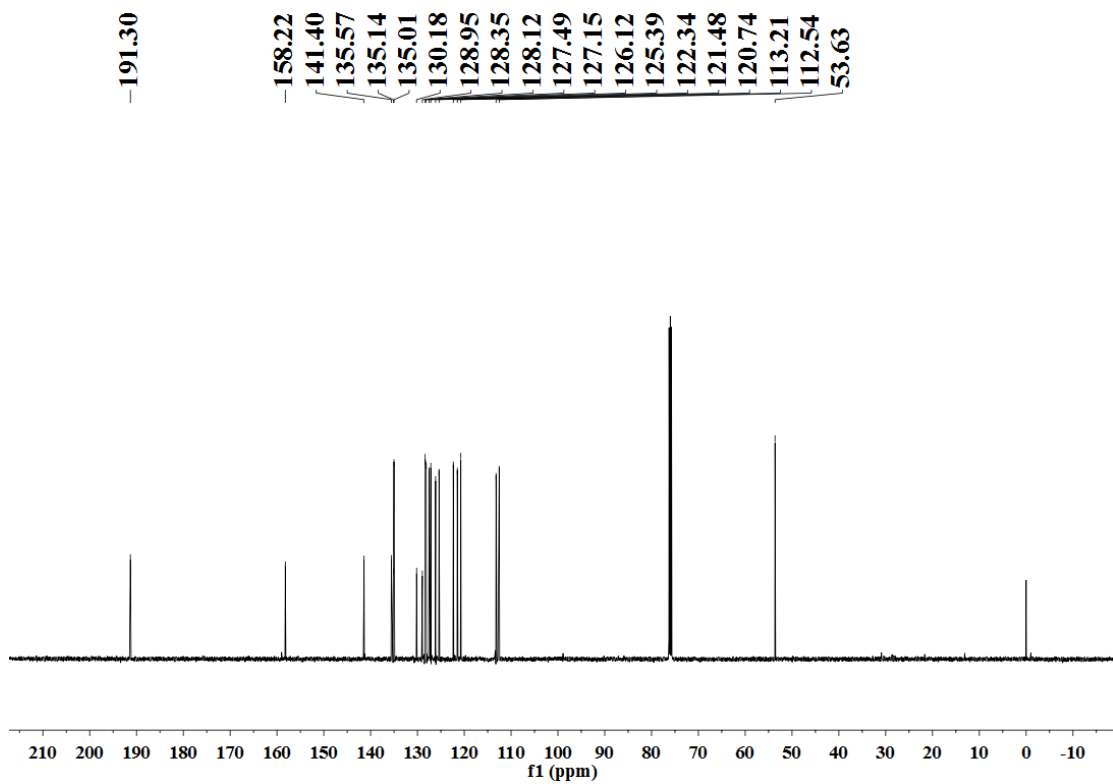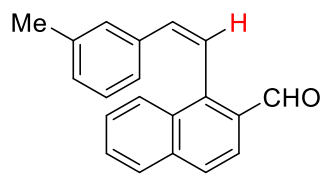

(1j)

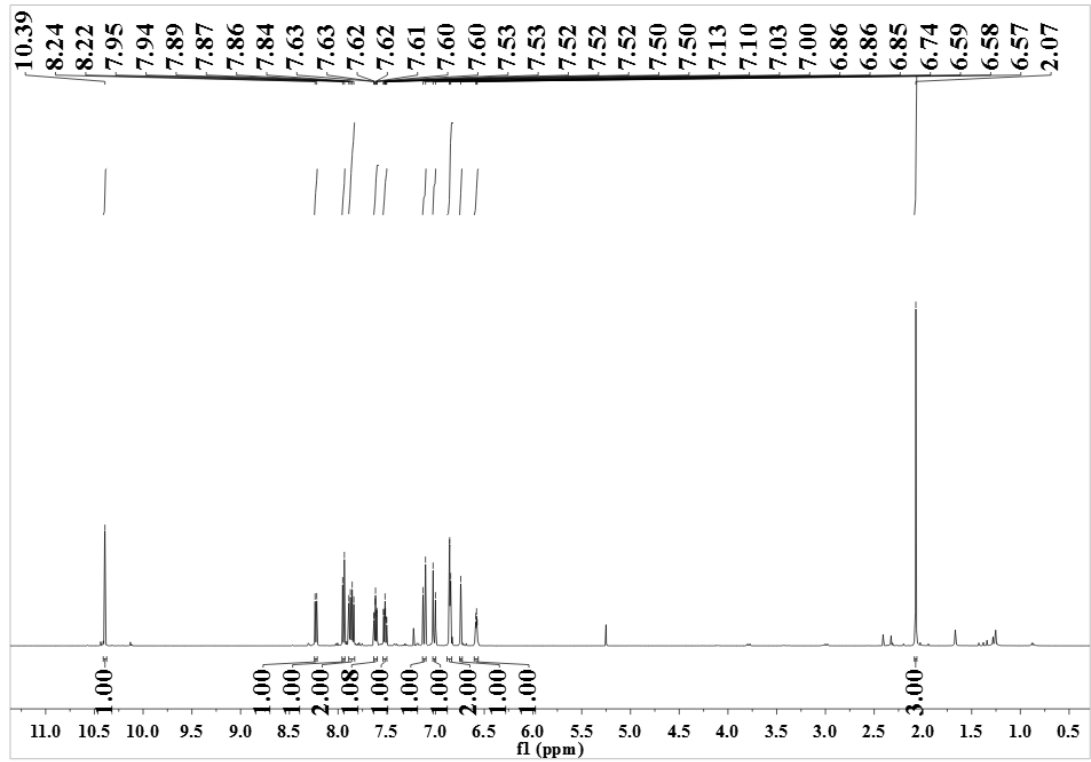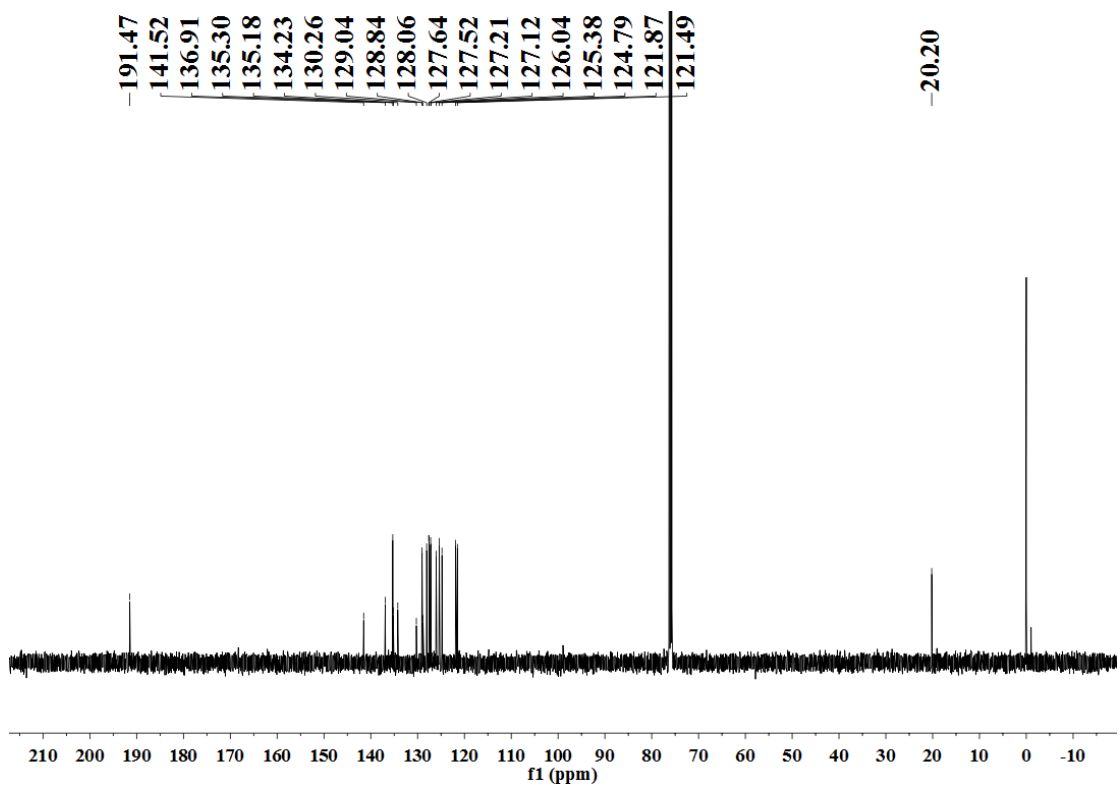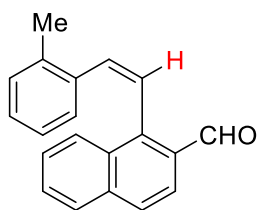

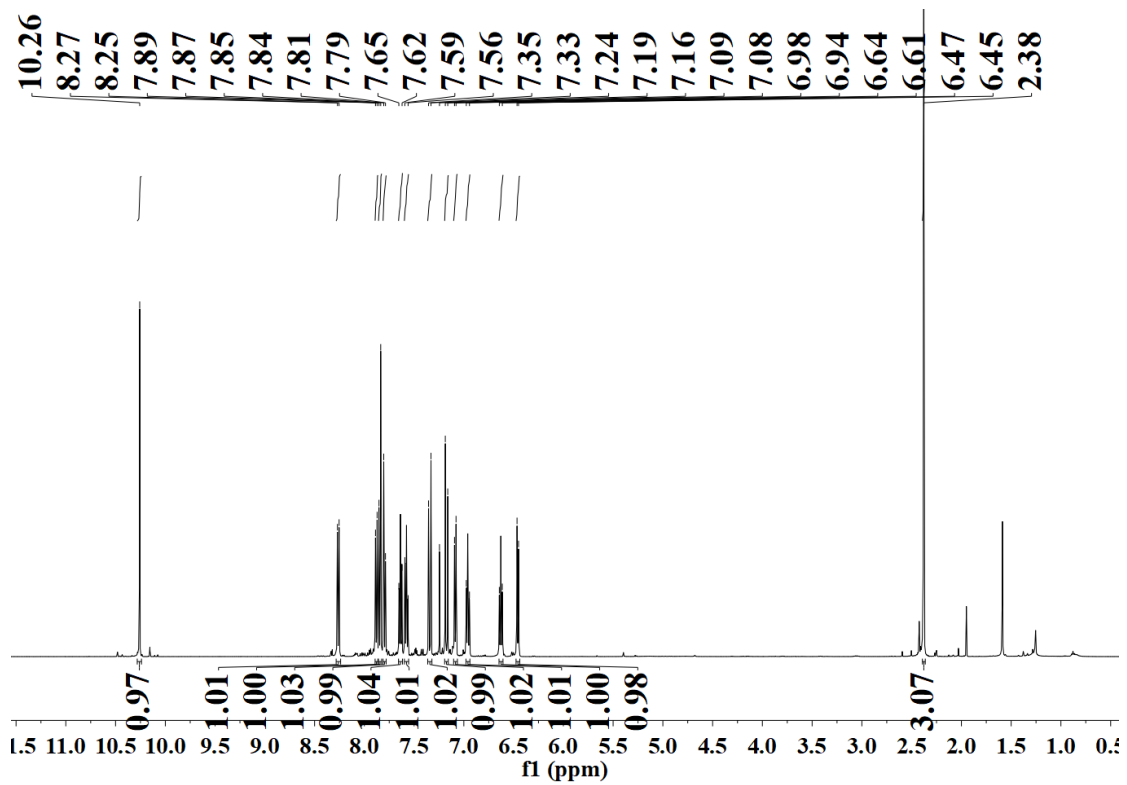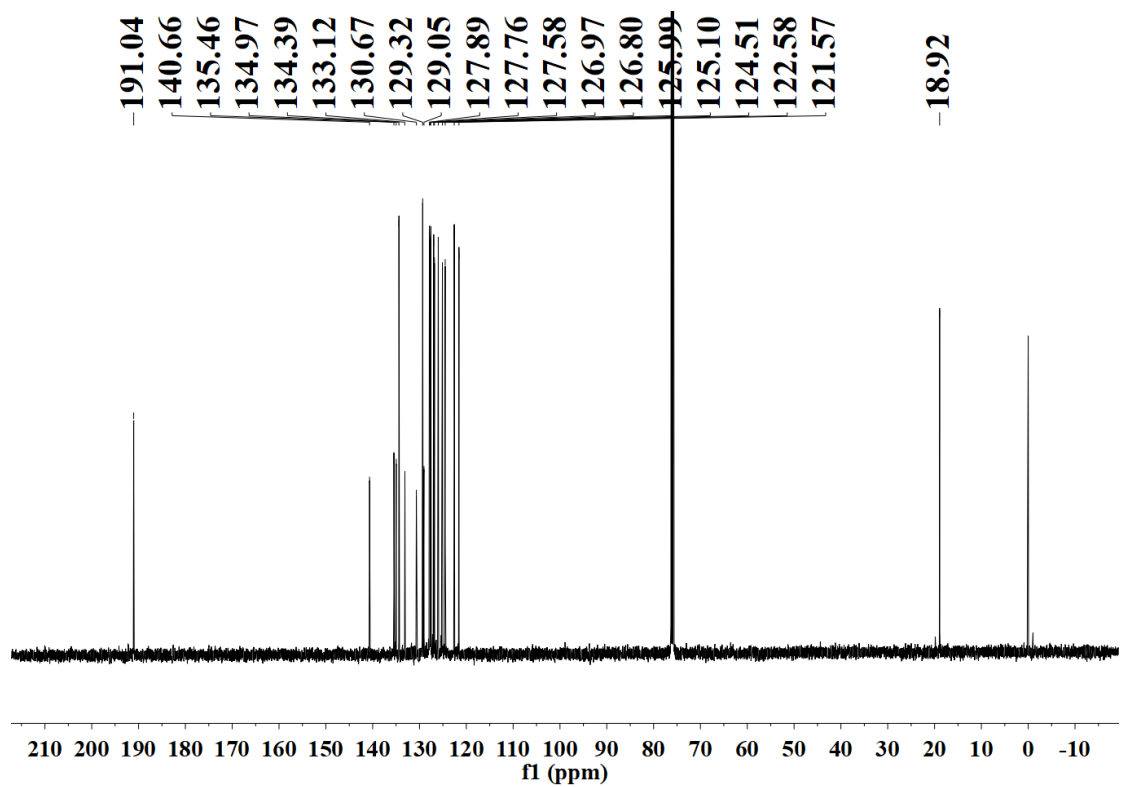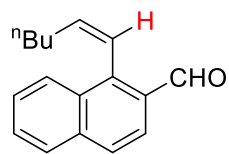

**(II)**

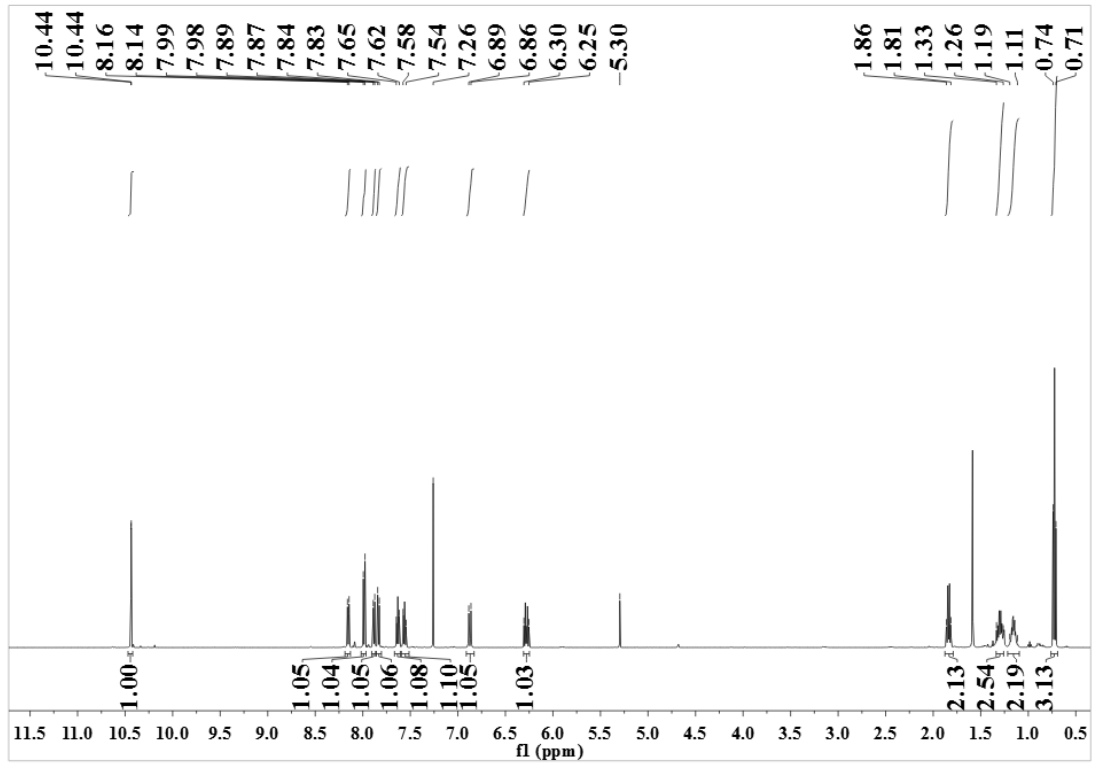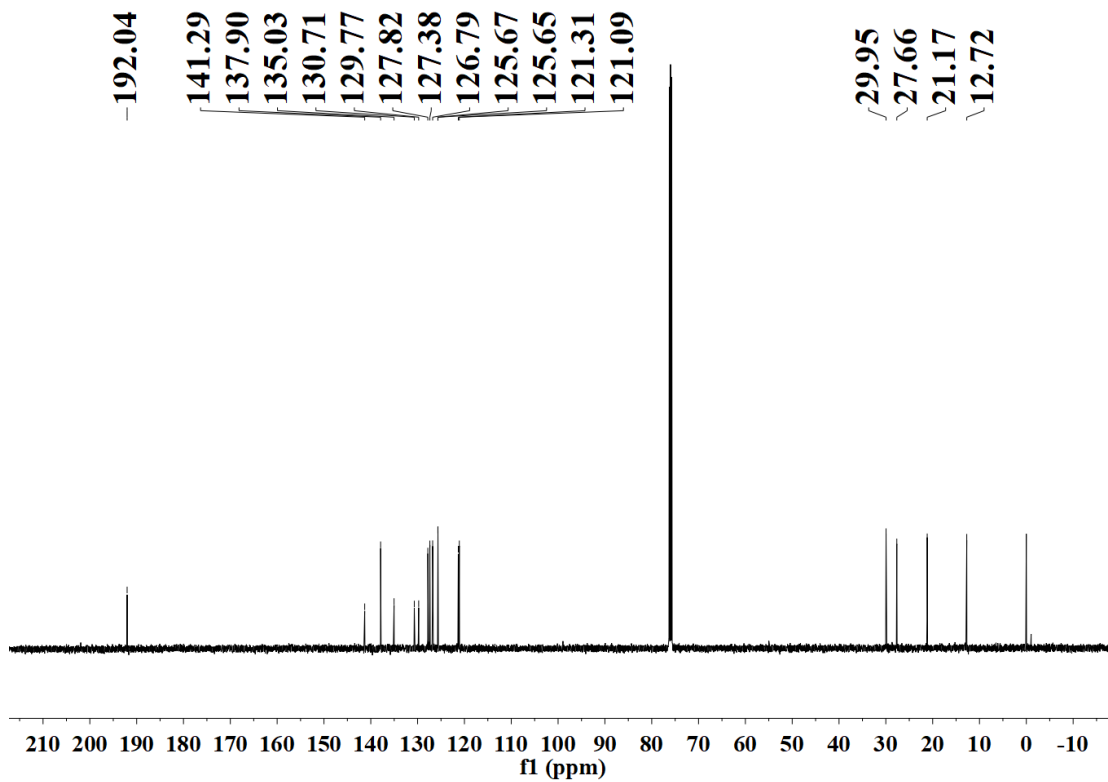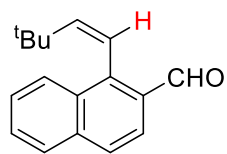

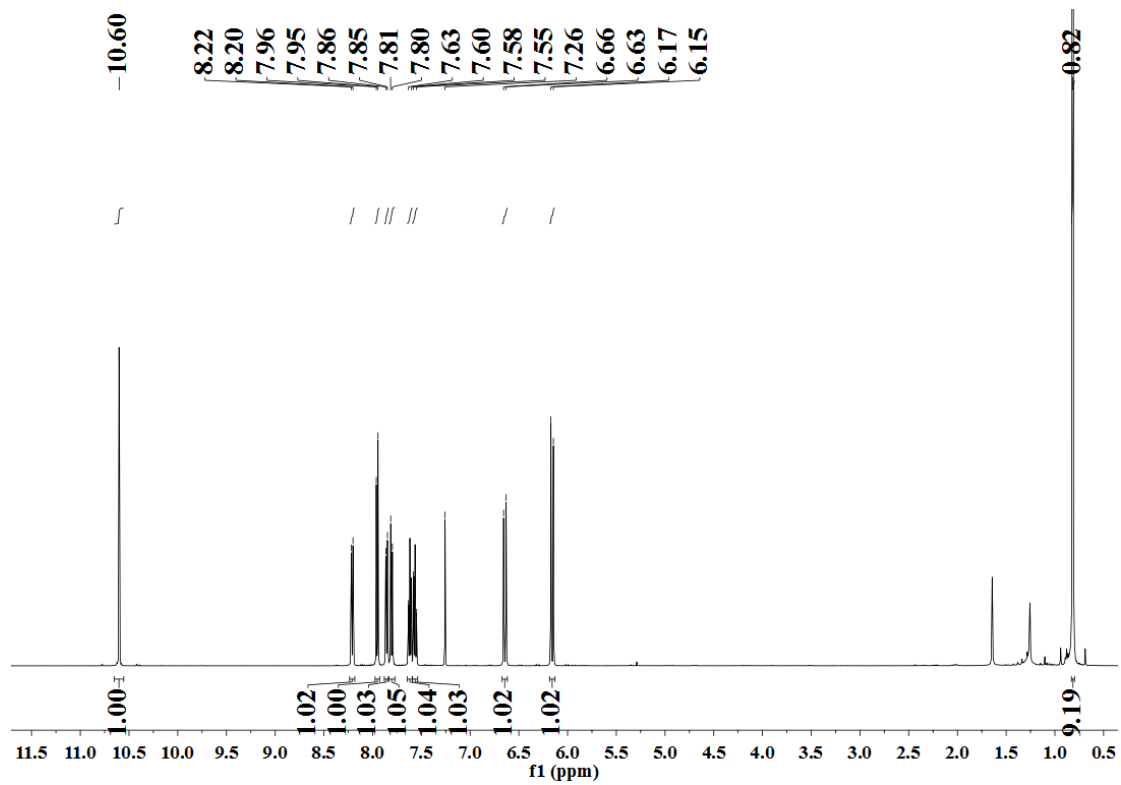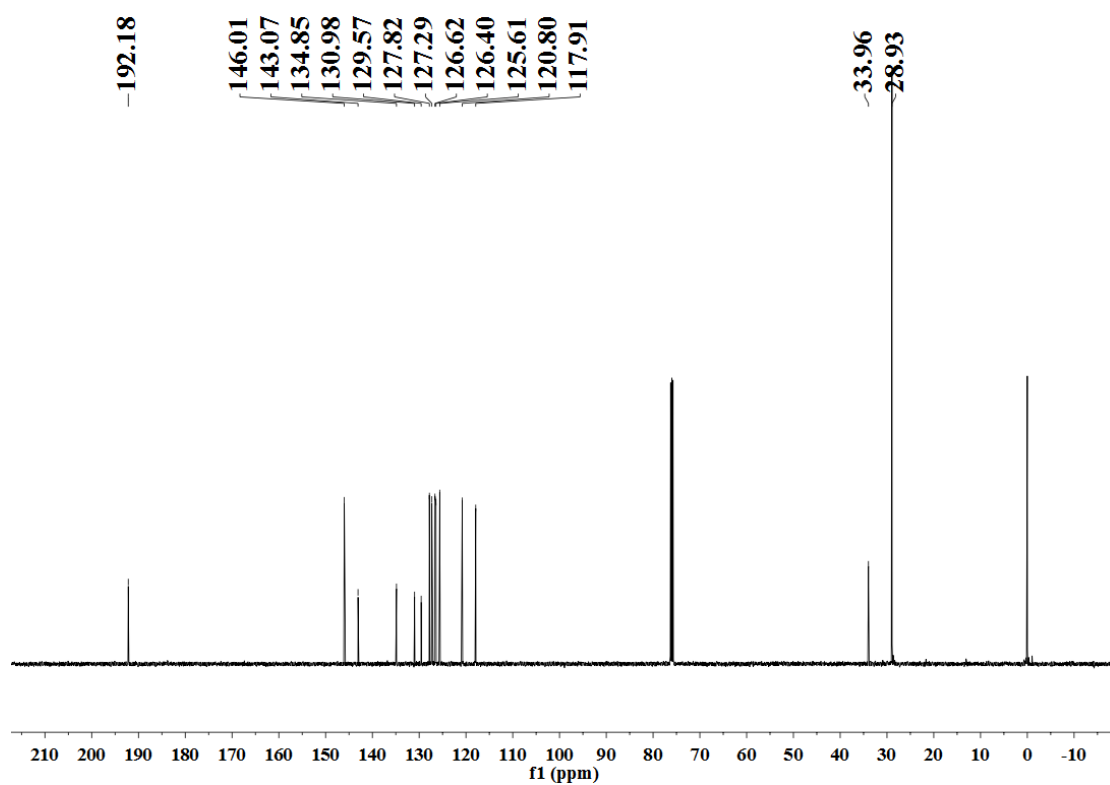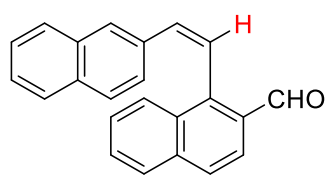

**(1n)**



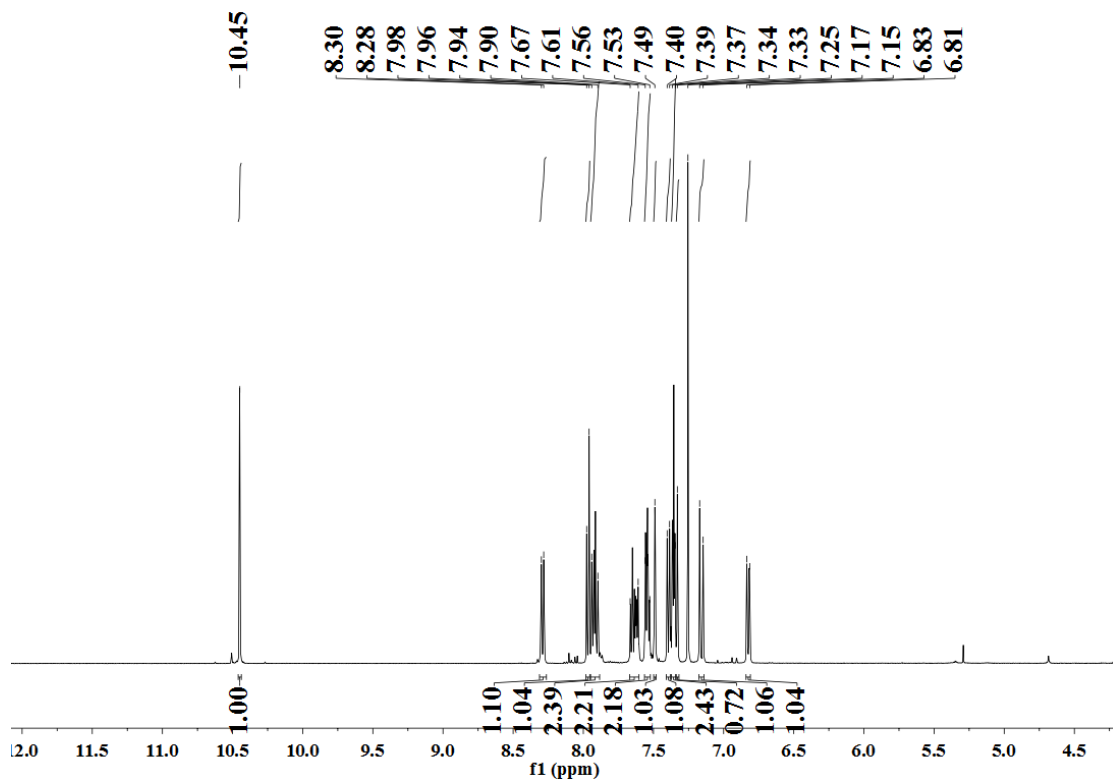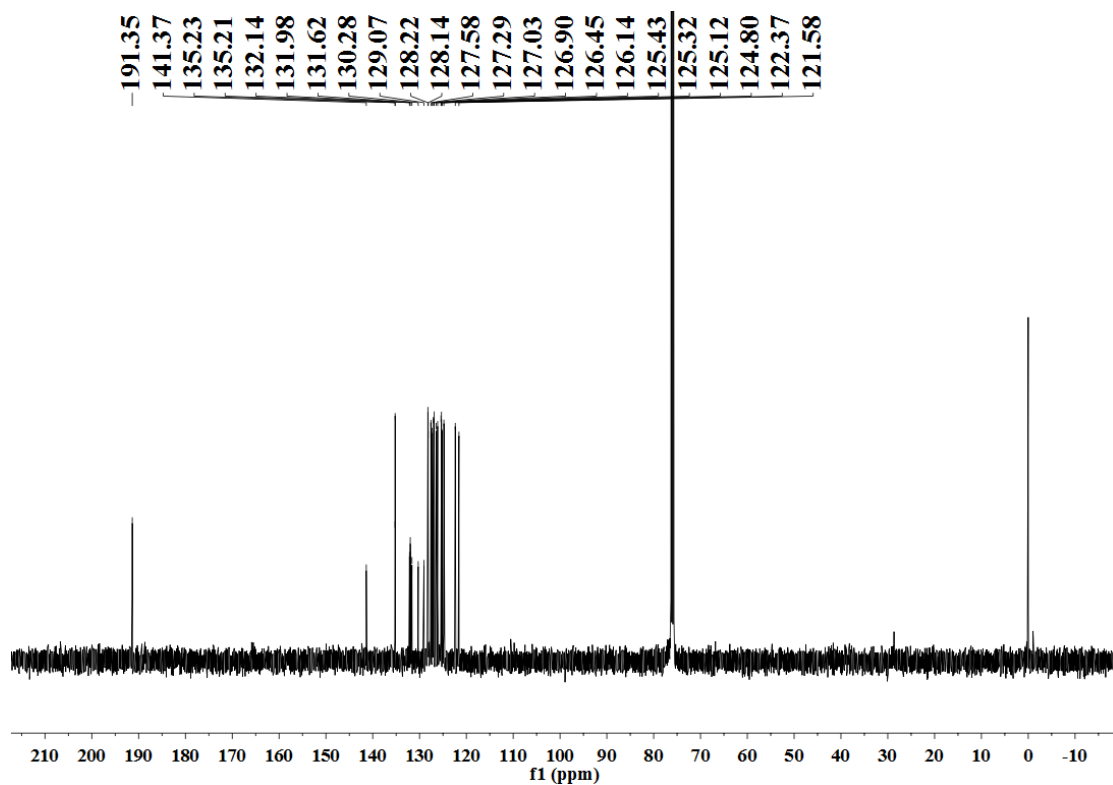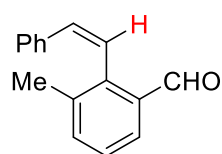

(1o)

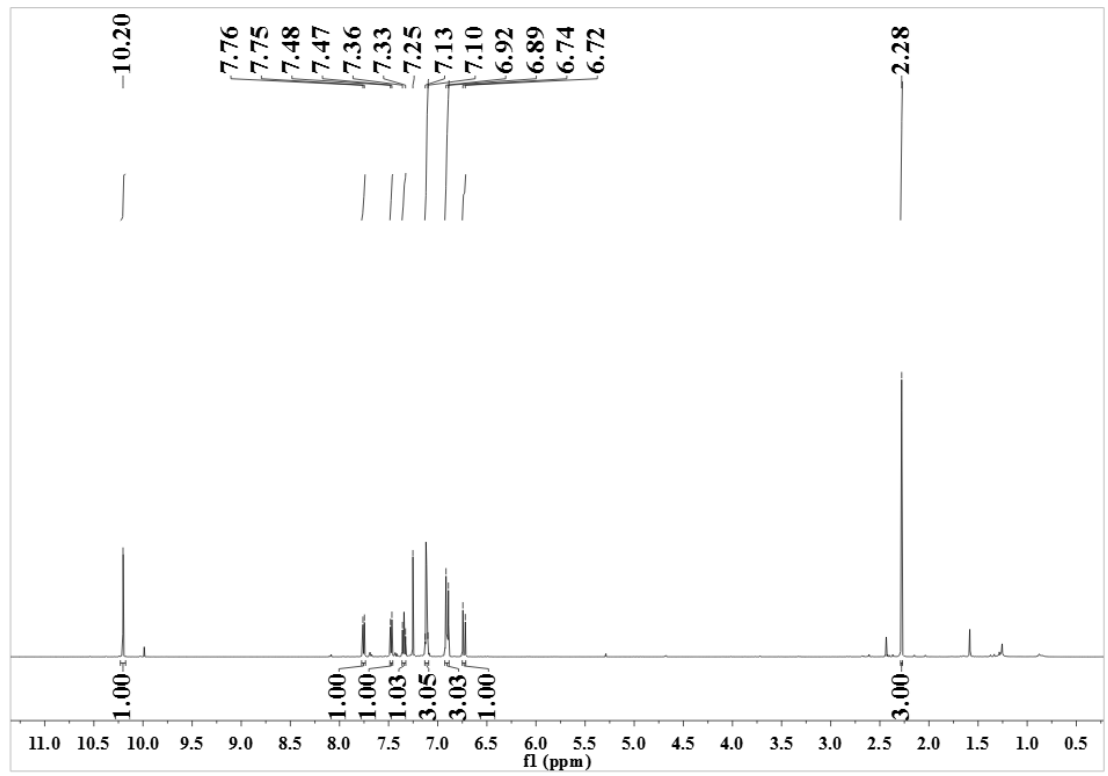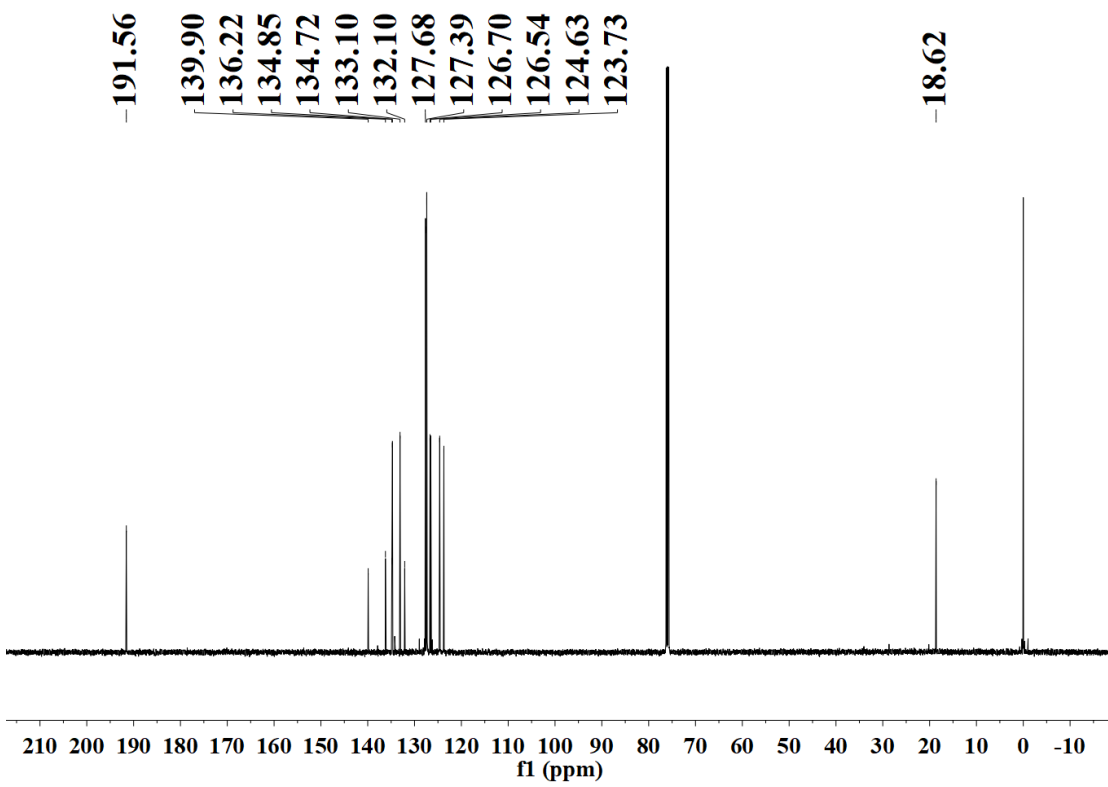

## 8.2 $^1\text{H}$ / $^{13}\text{C}$ NMR Charts of The Products

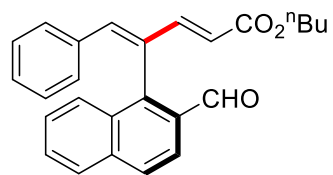

(3a)

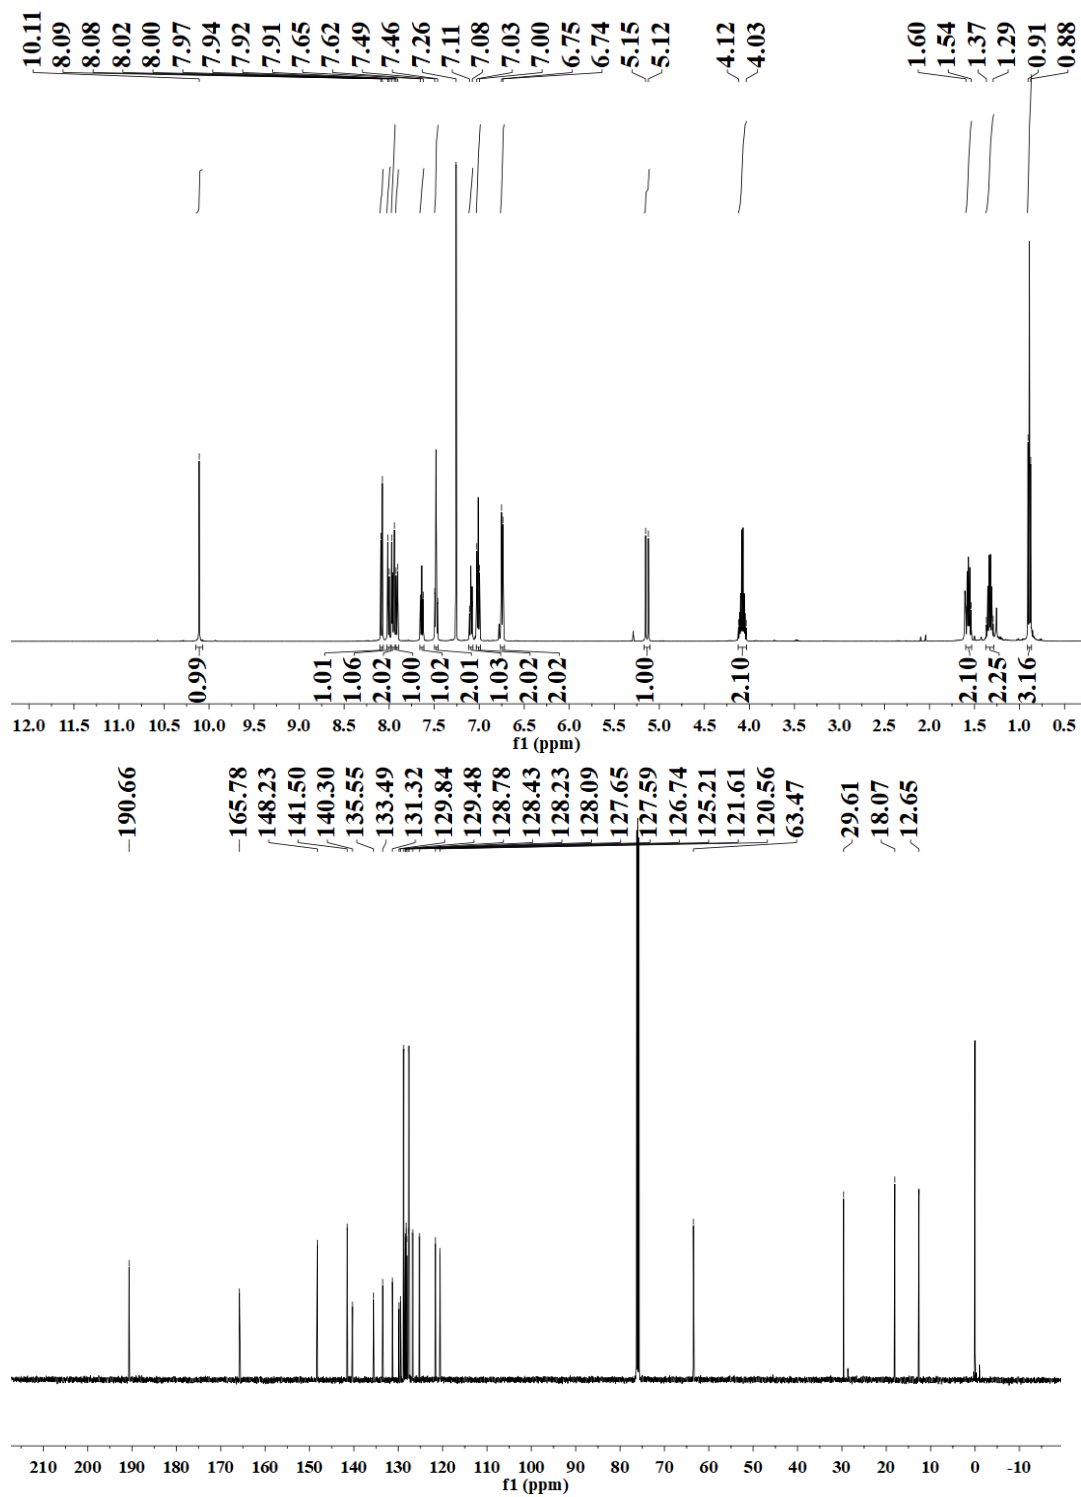

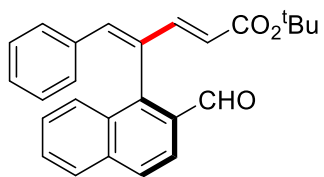

(3b)

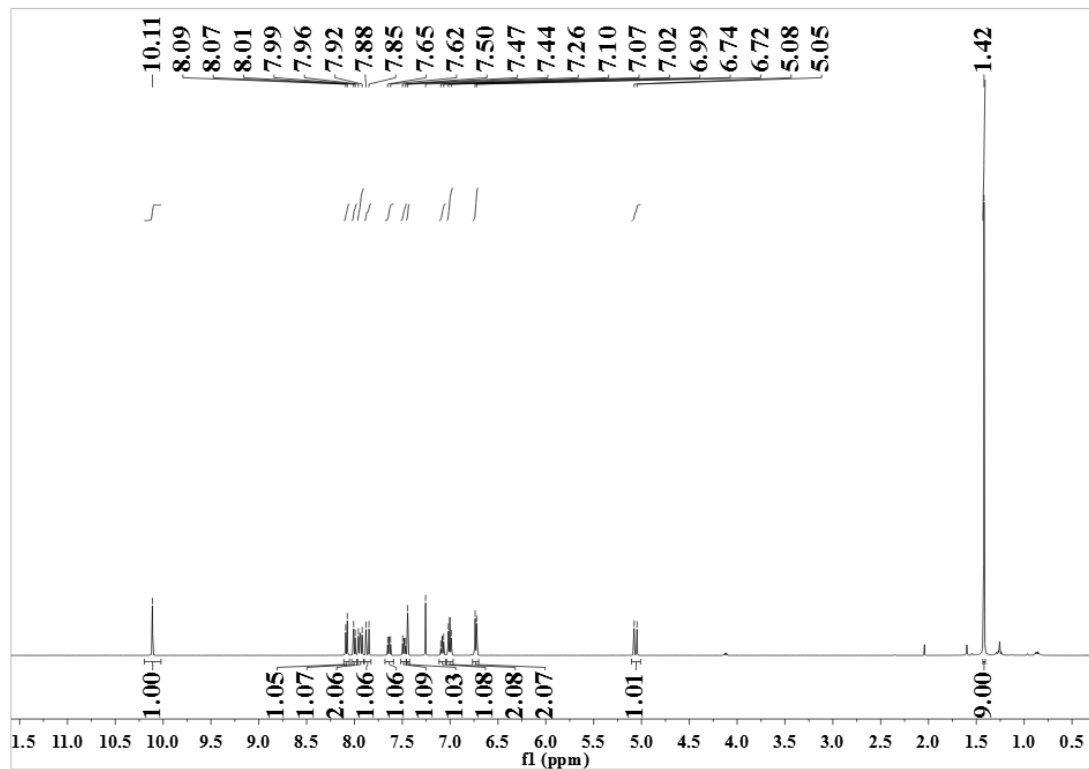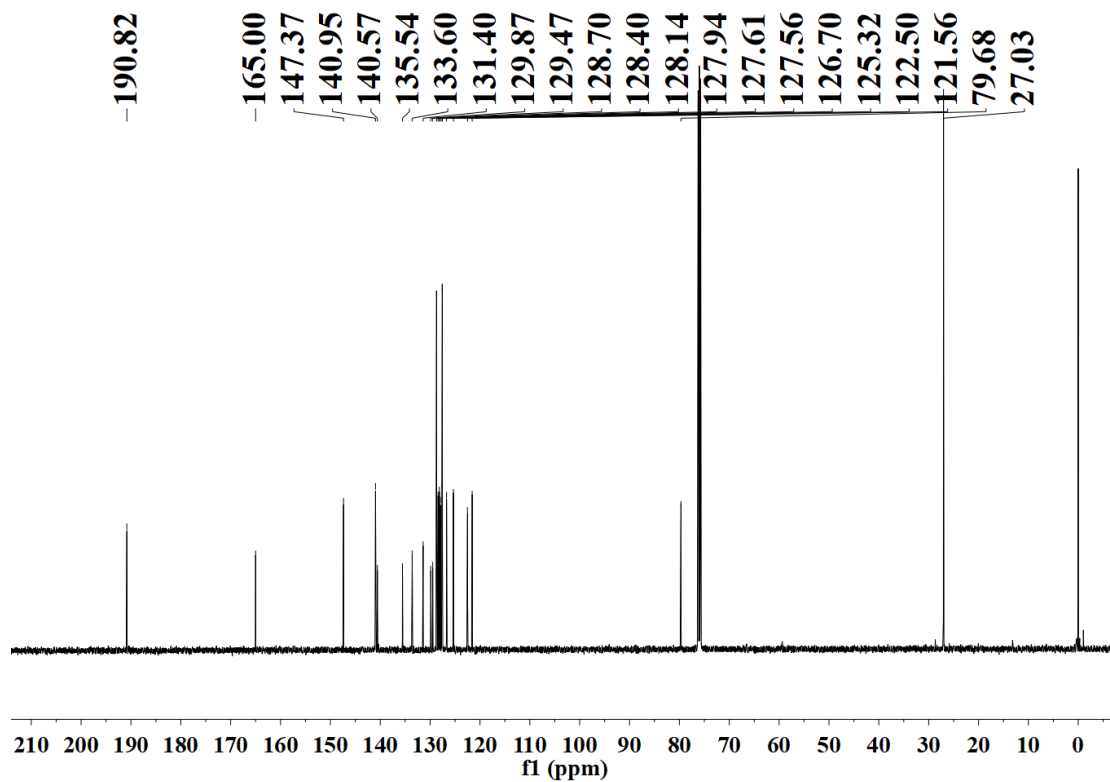

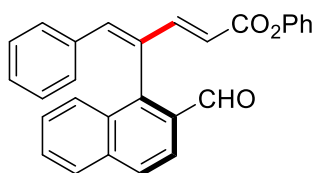

(3c)

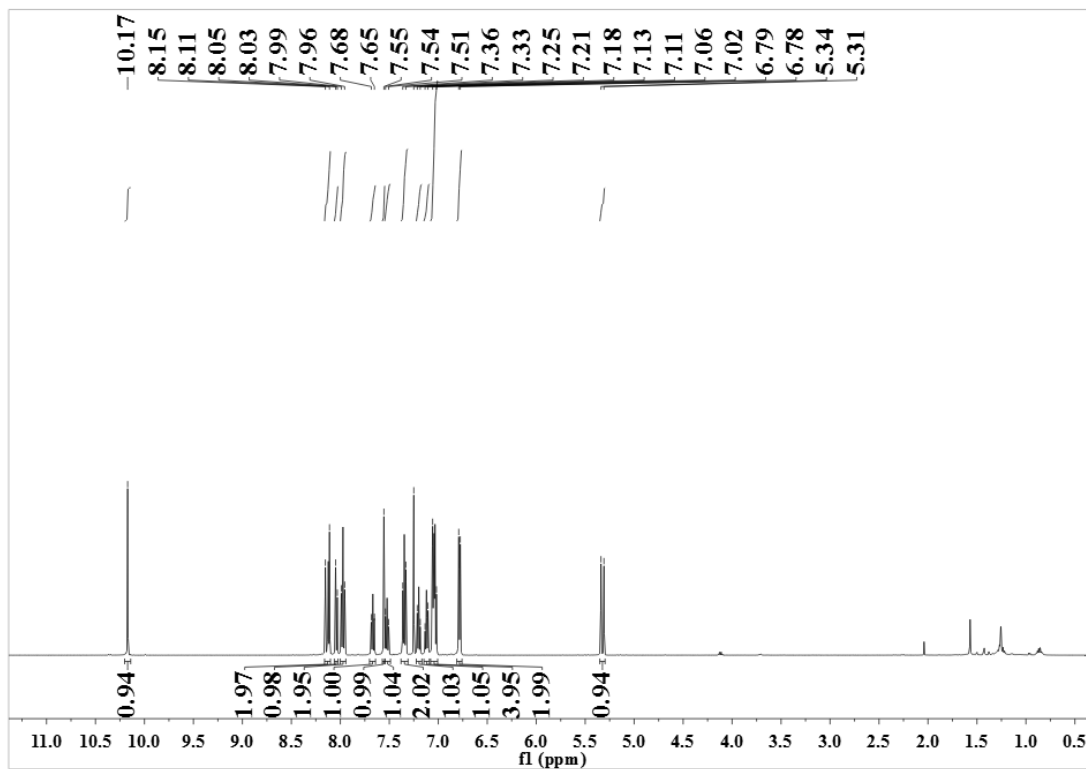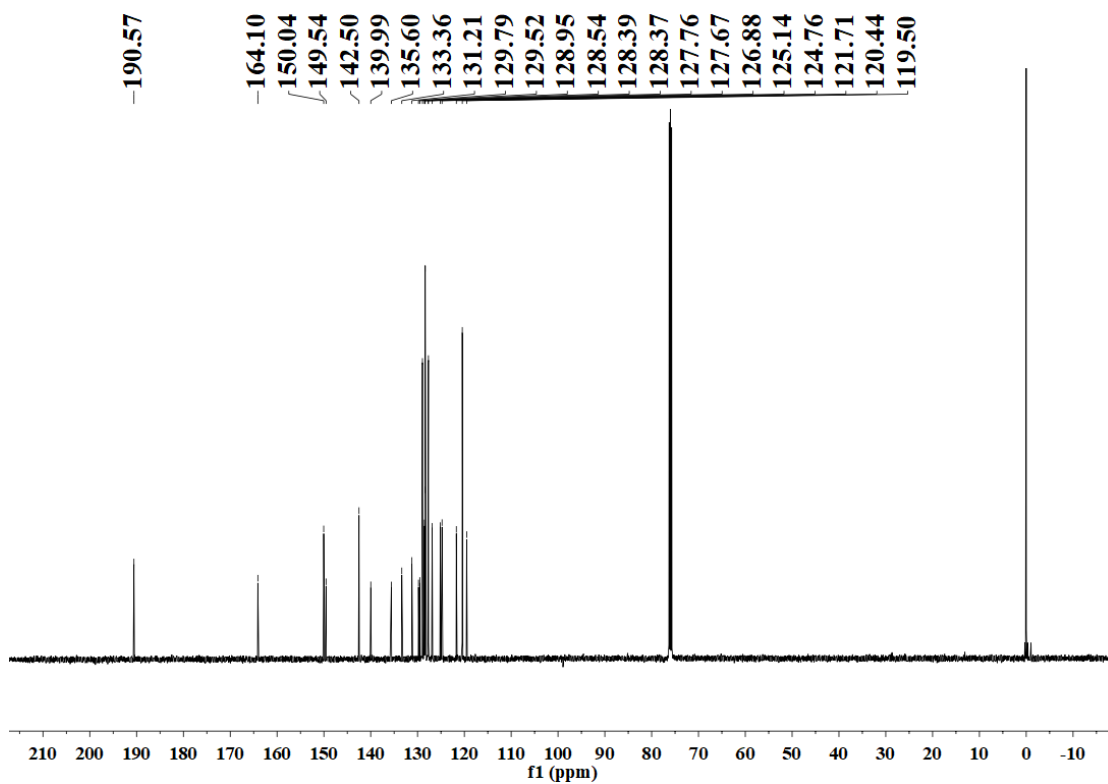

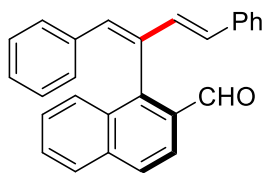

(3d)

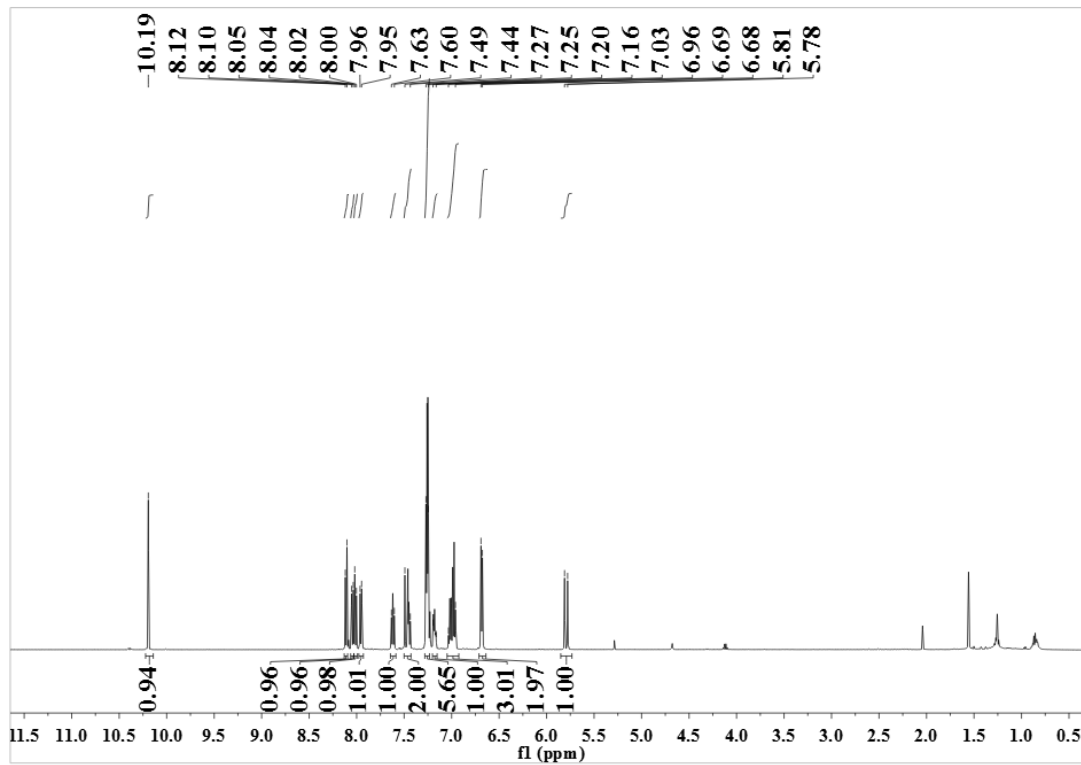

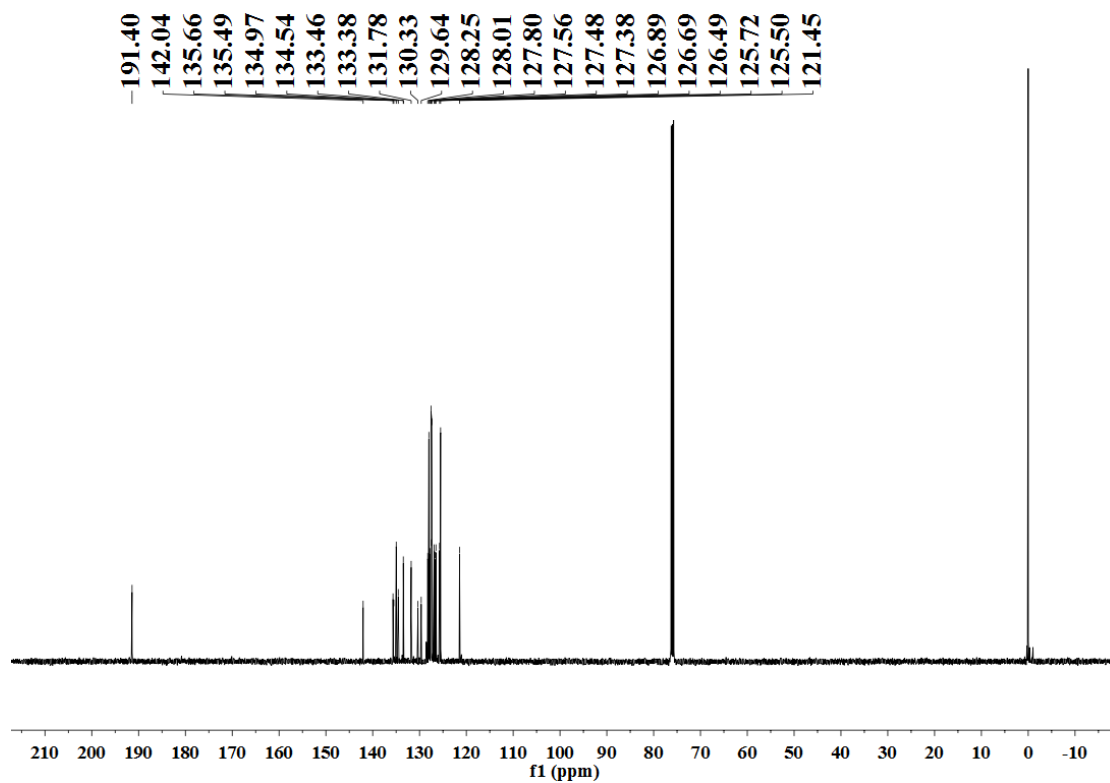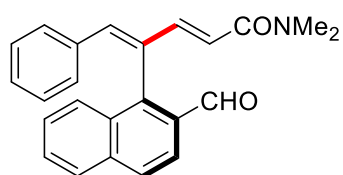

(3e)

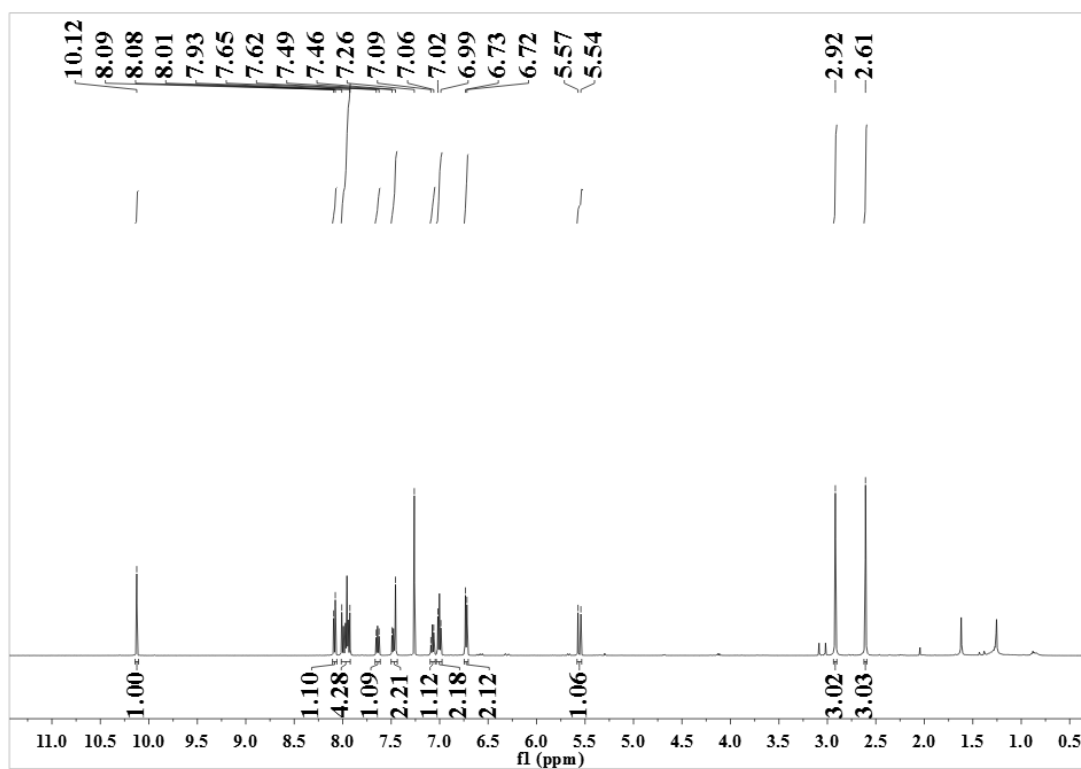

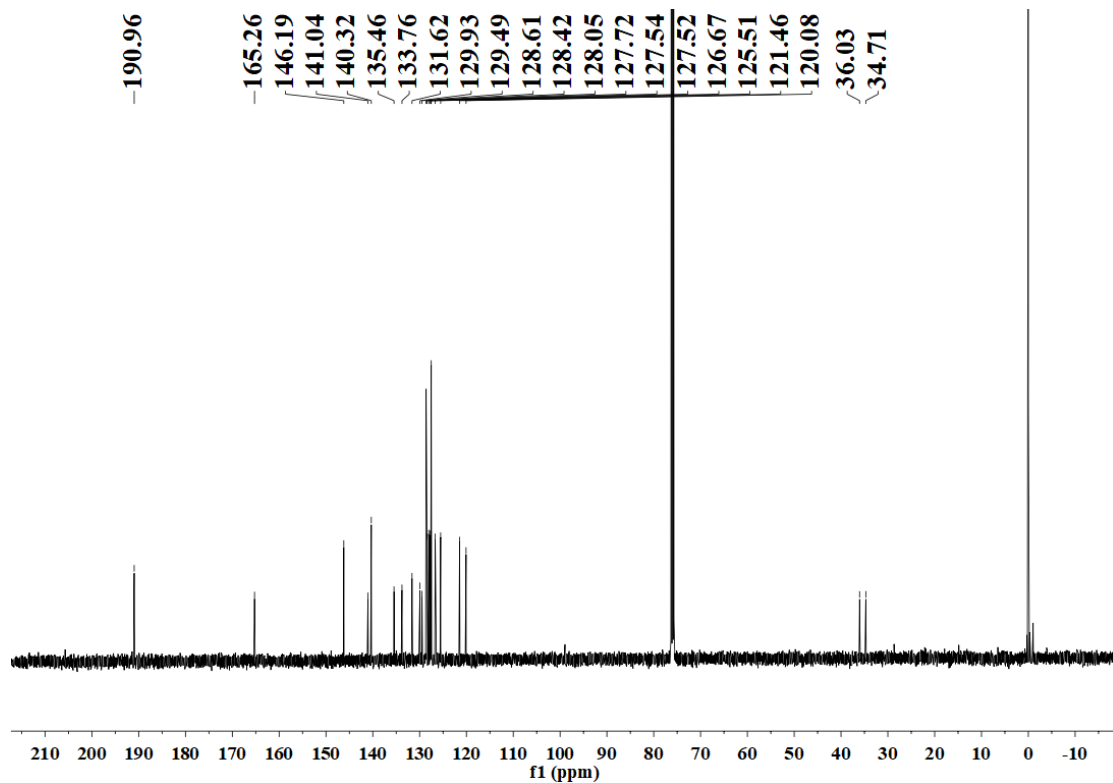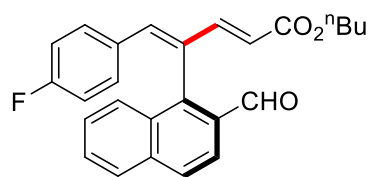

(3f)

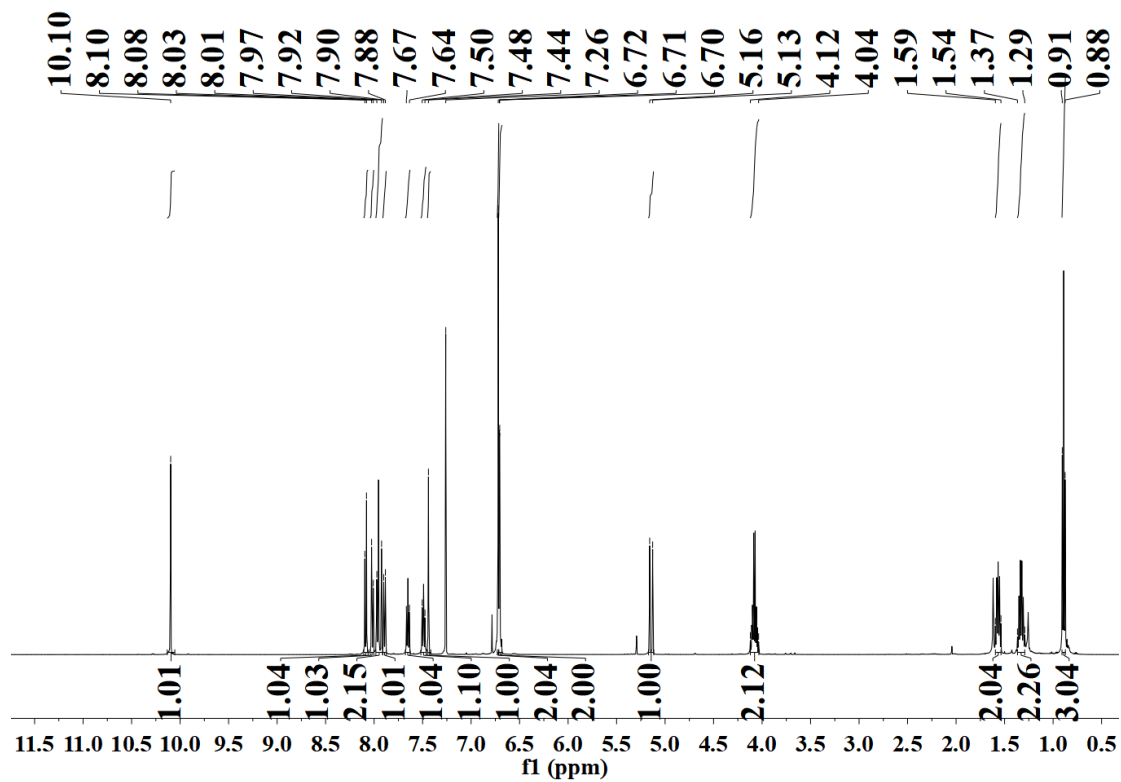



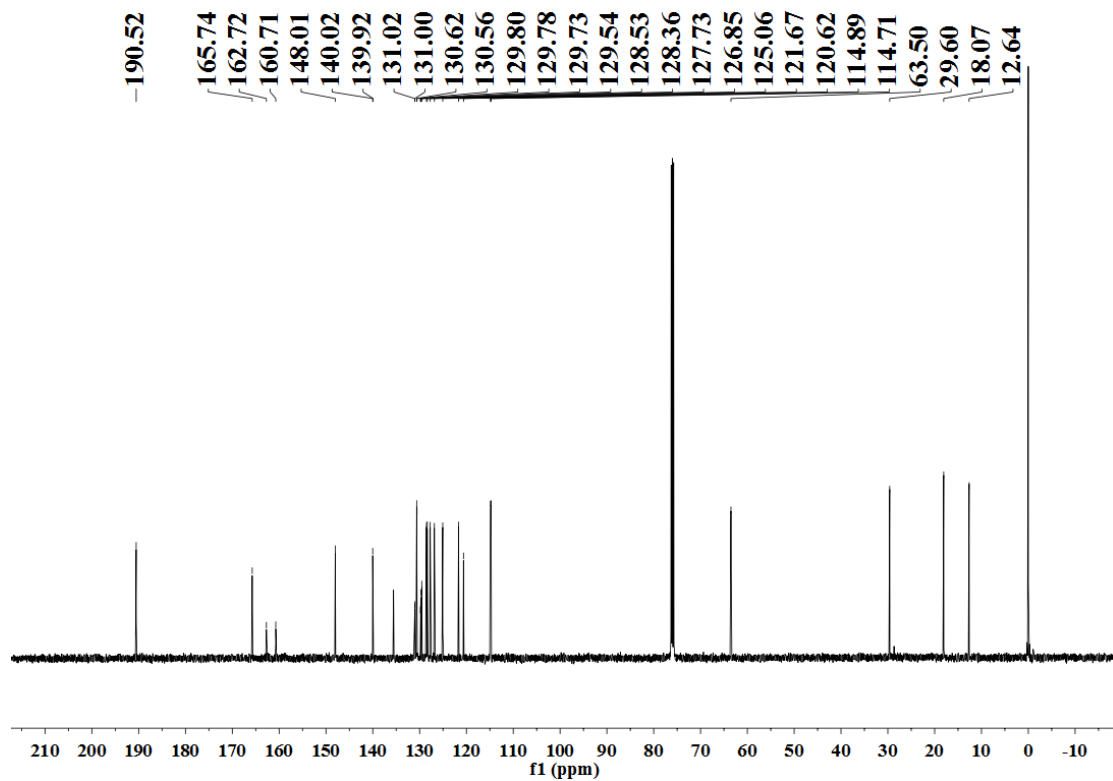

--110.32

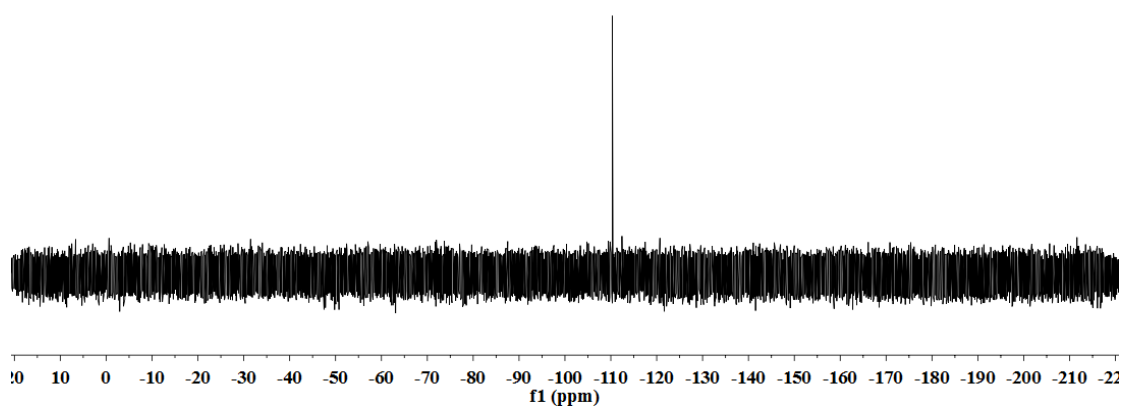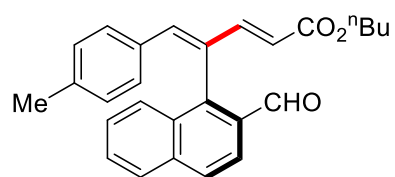

(3g)

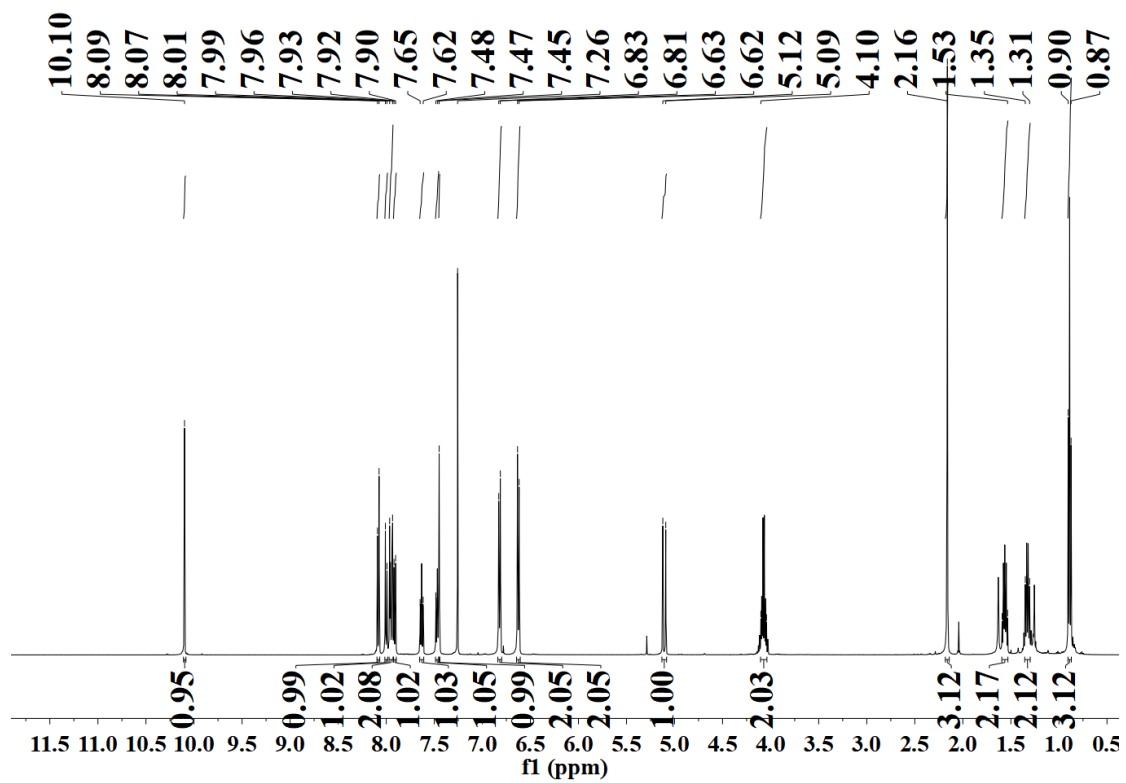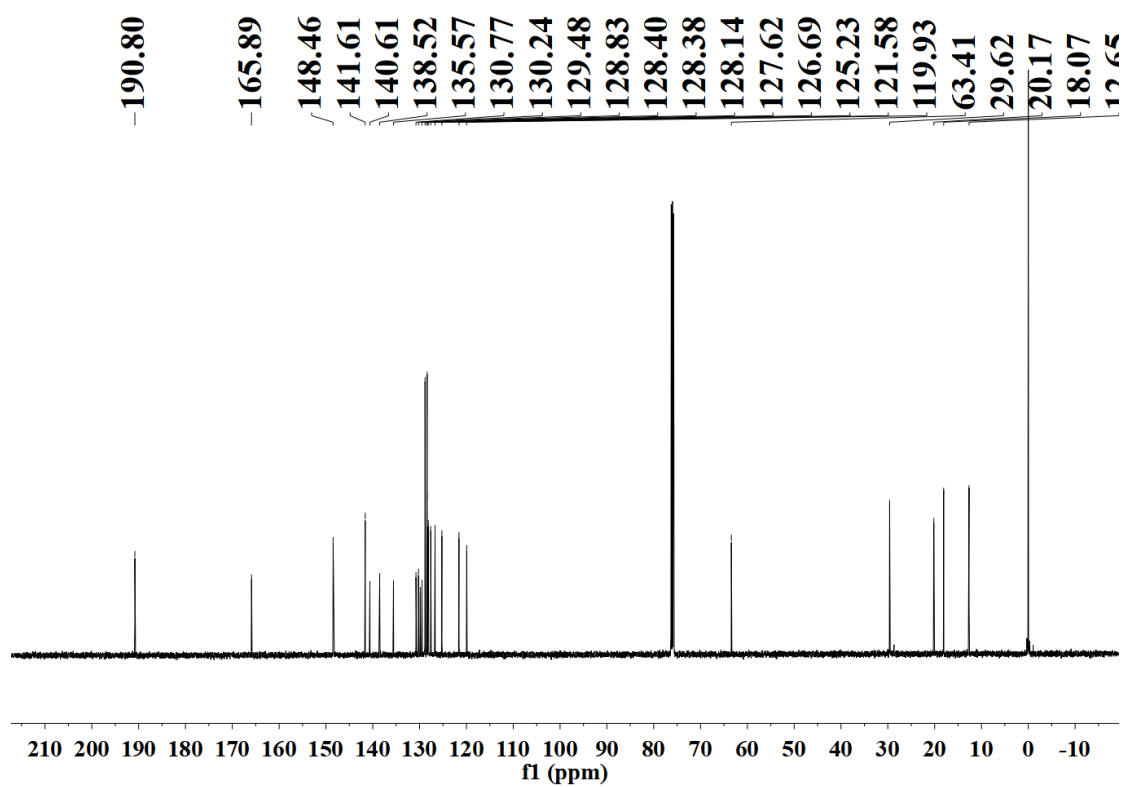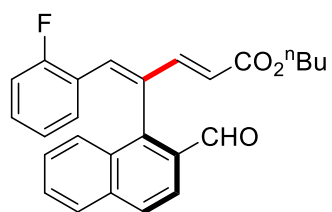

(3h)

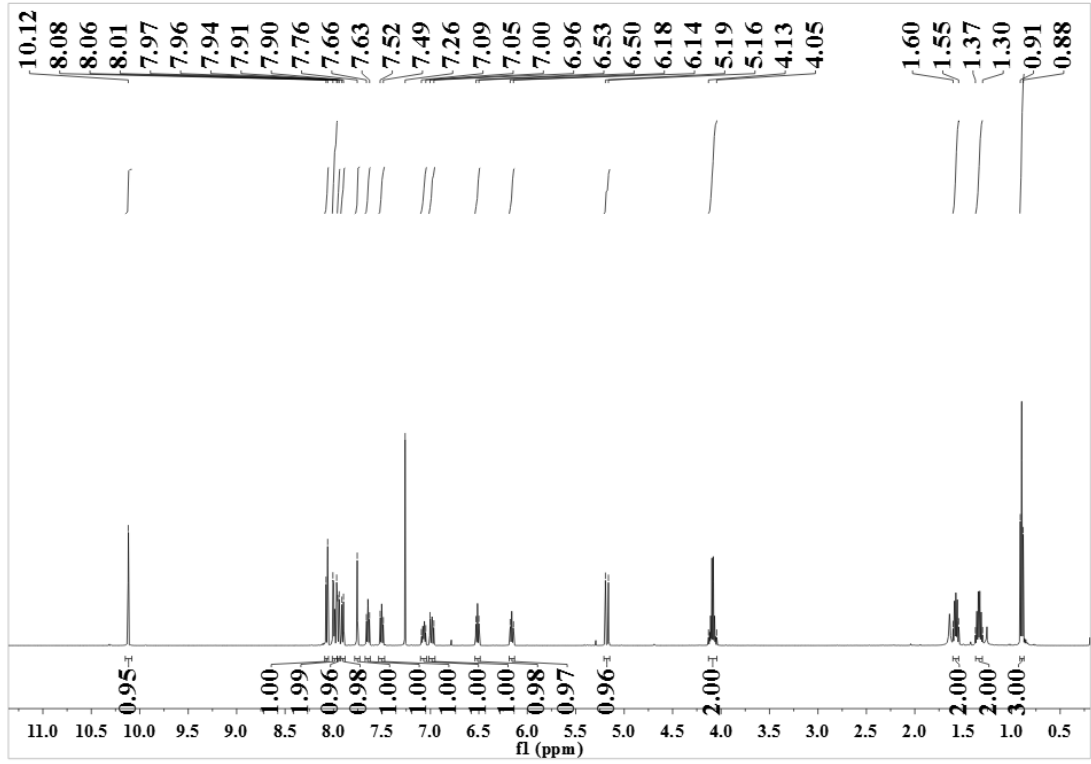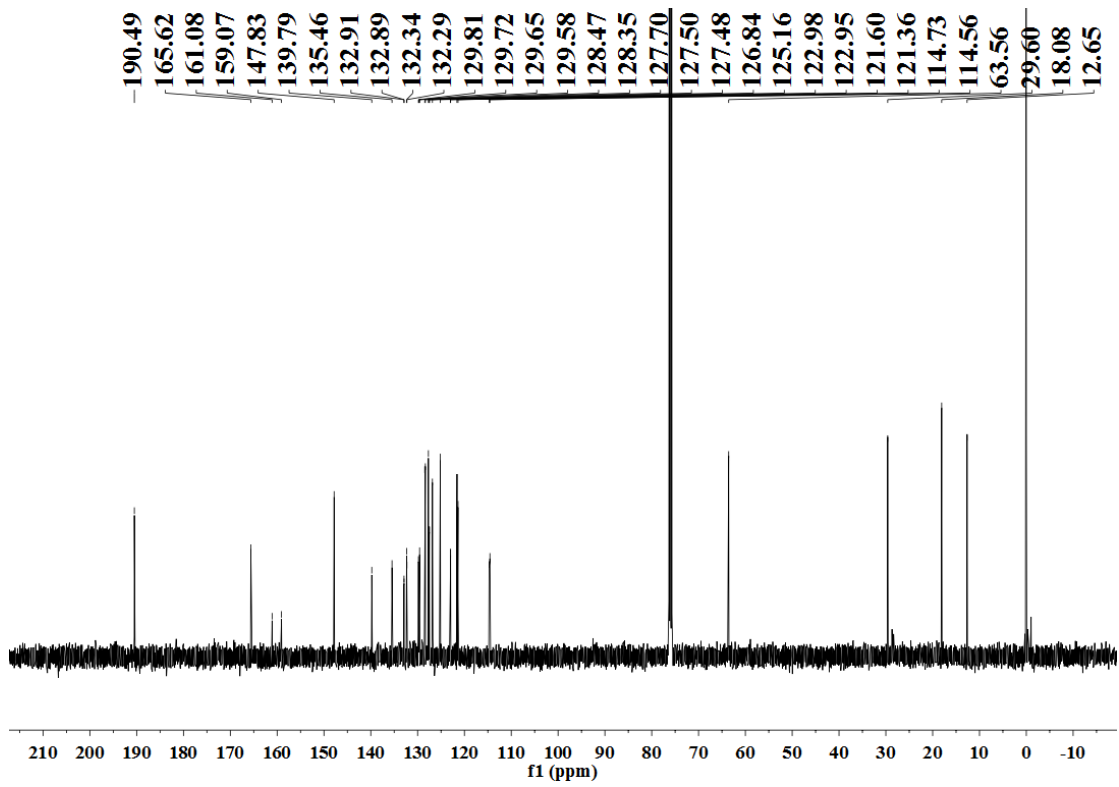

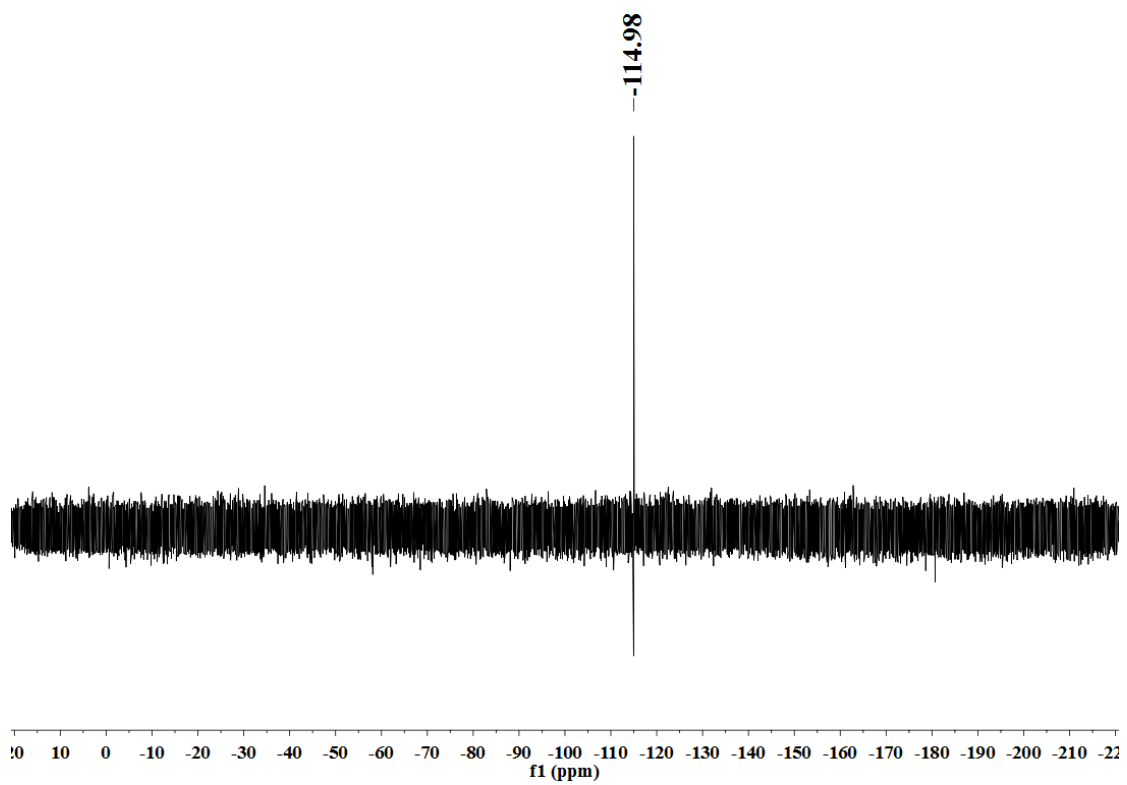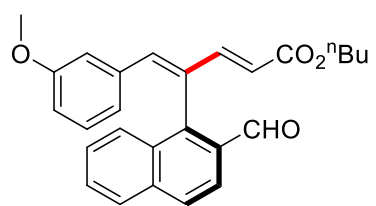

**(3i)**

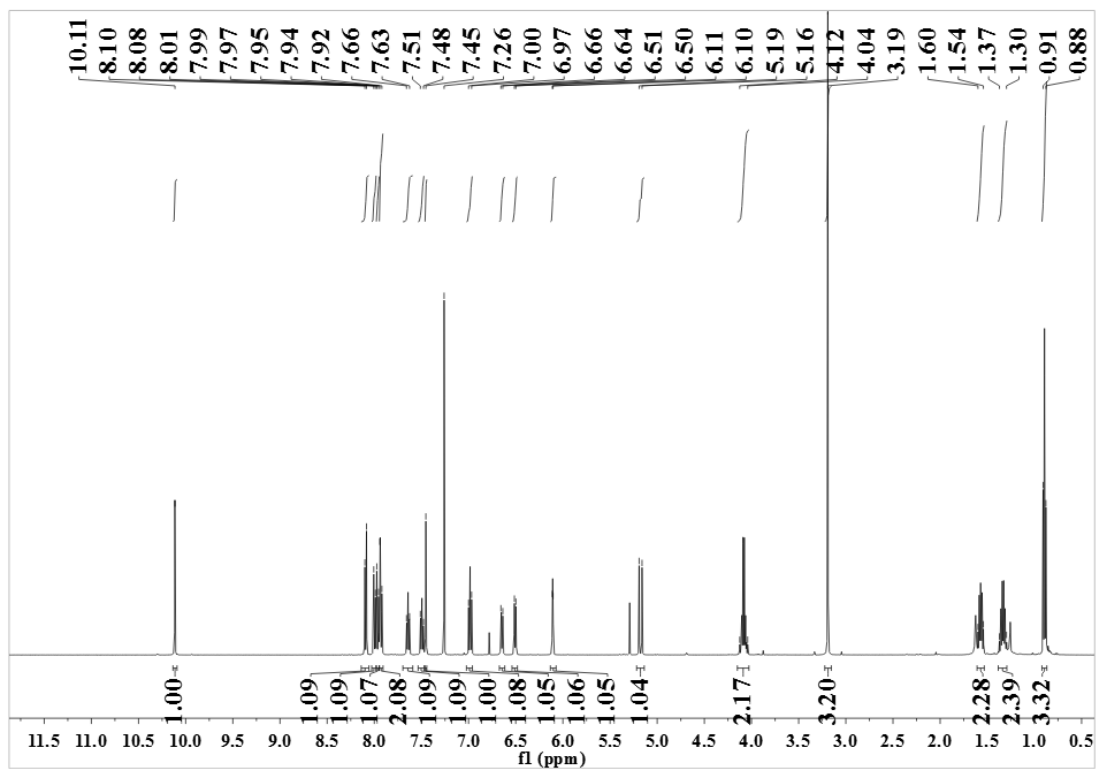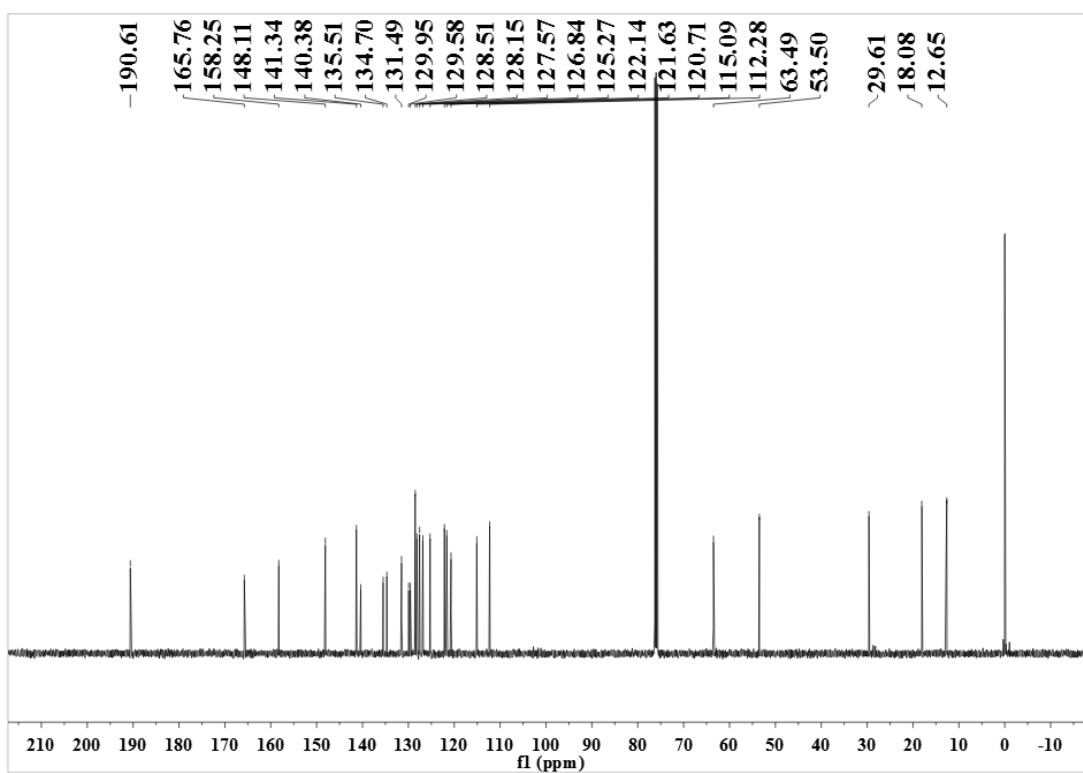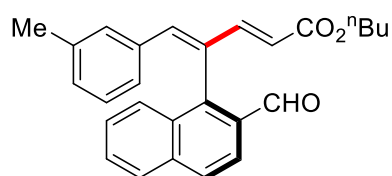

**(3j)**

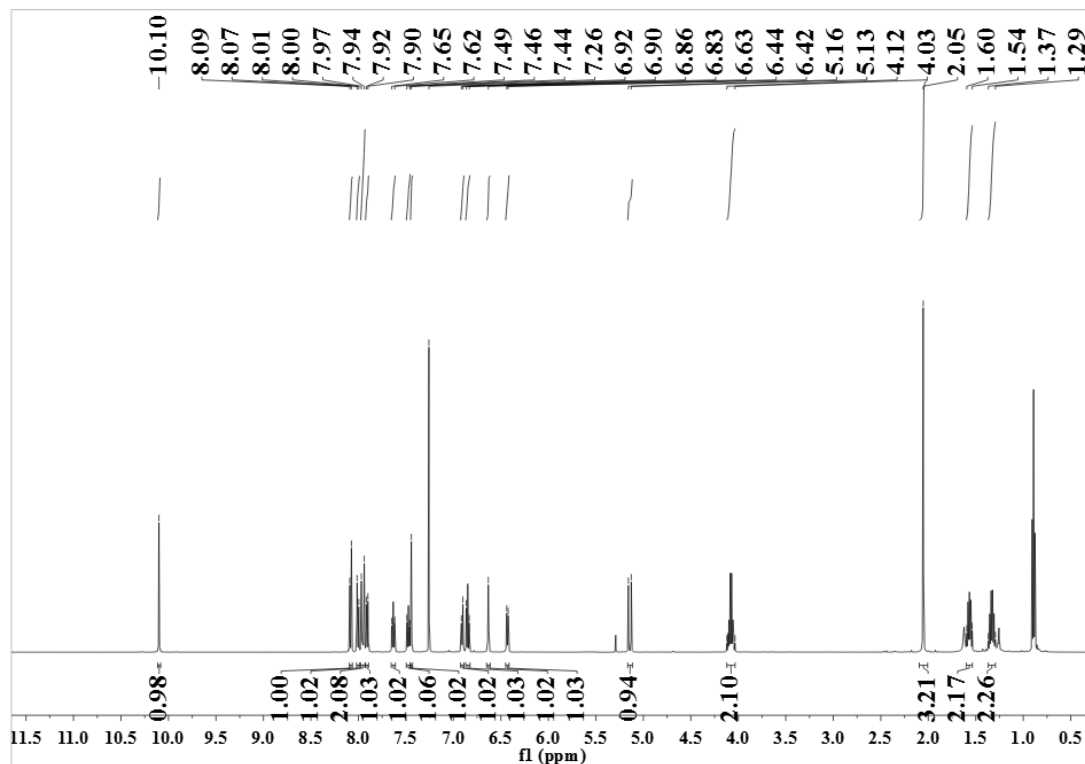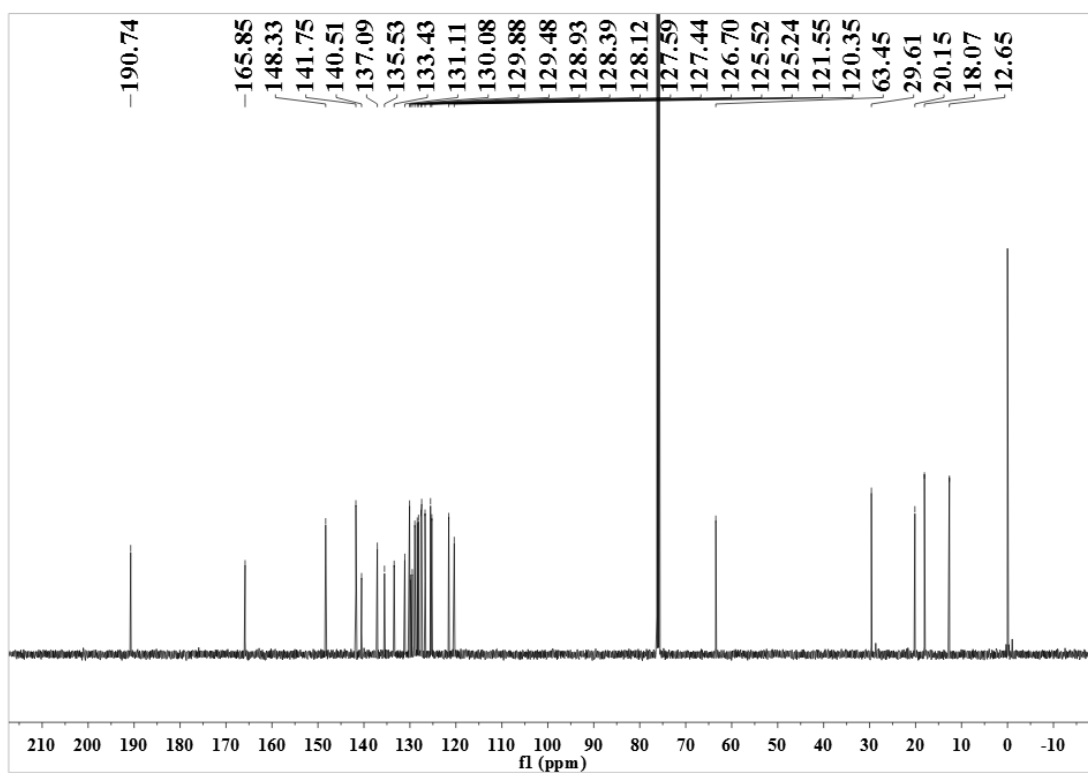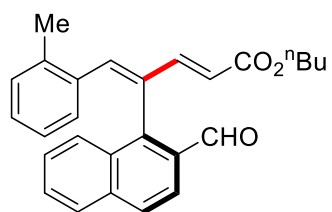

(3k)

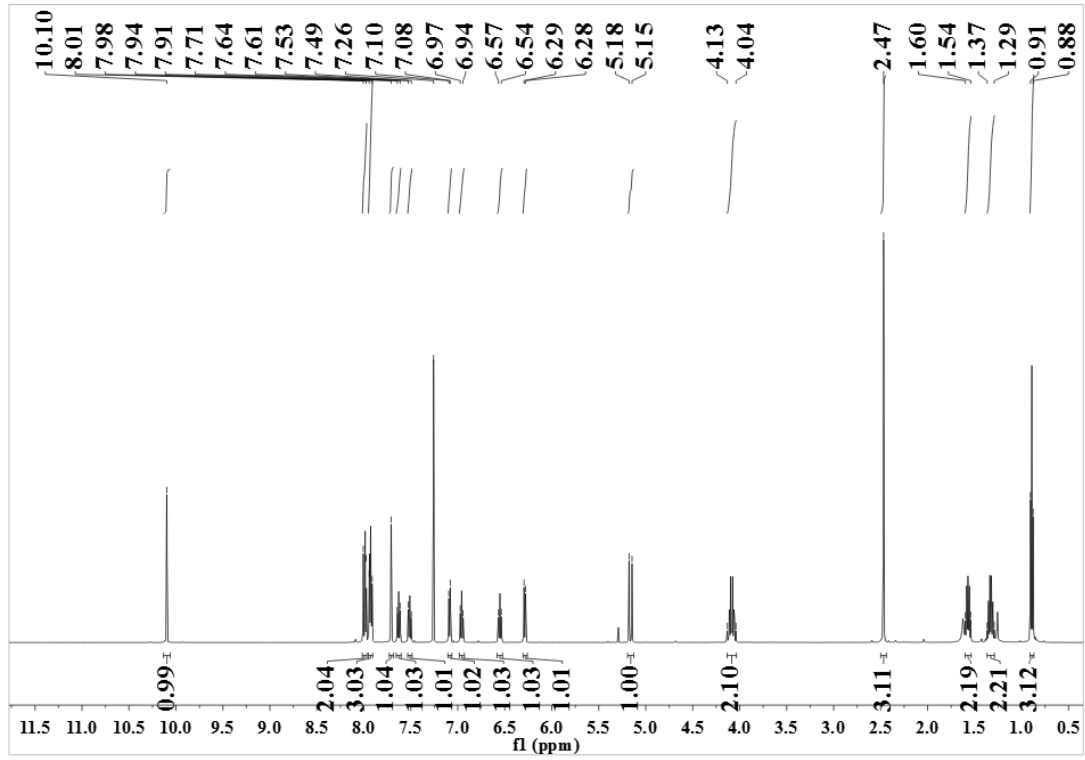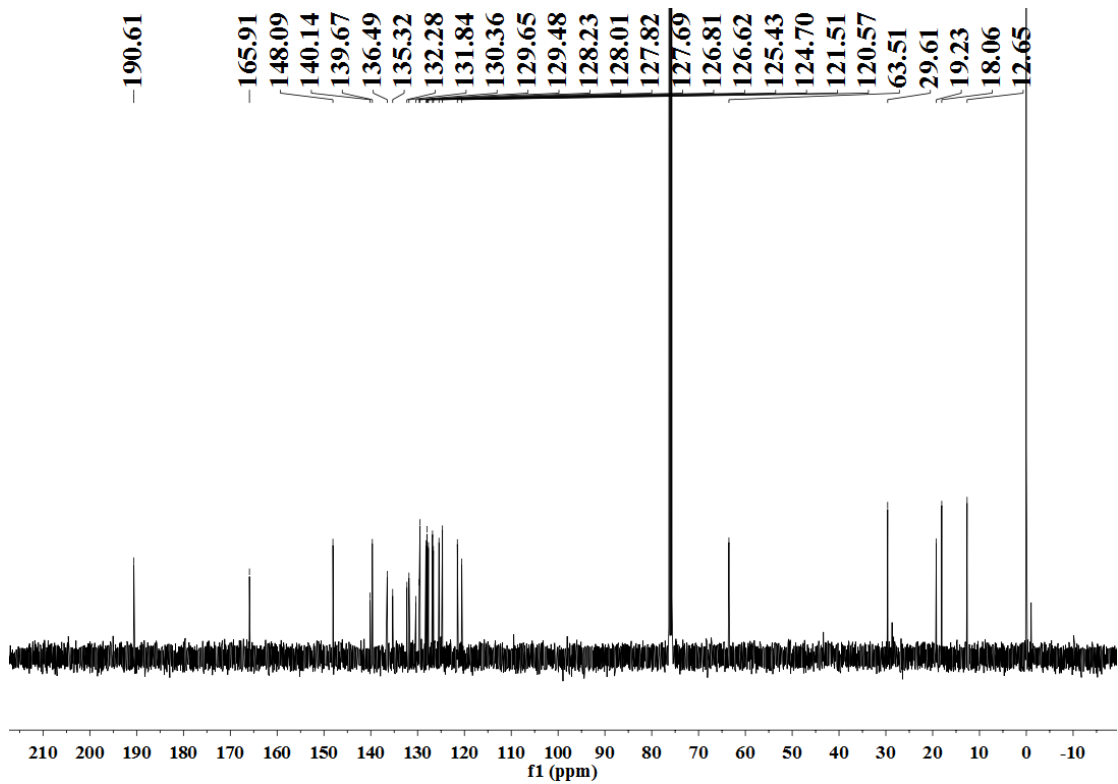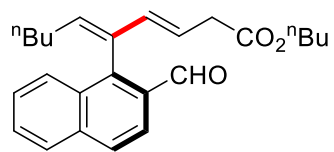

(31)

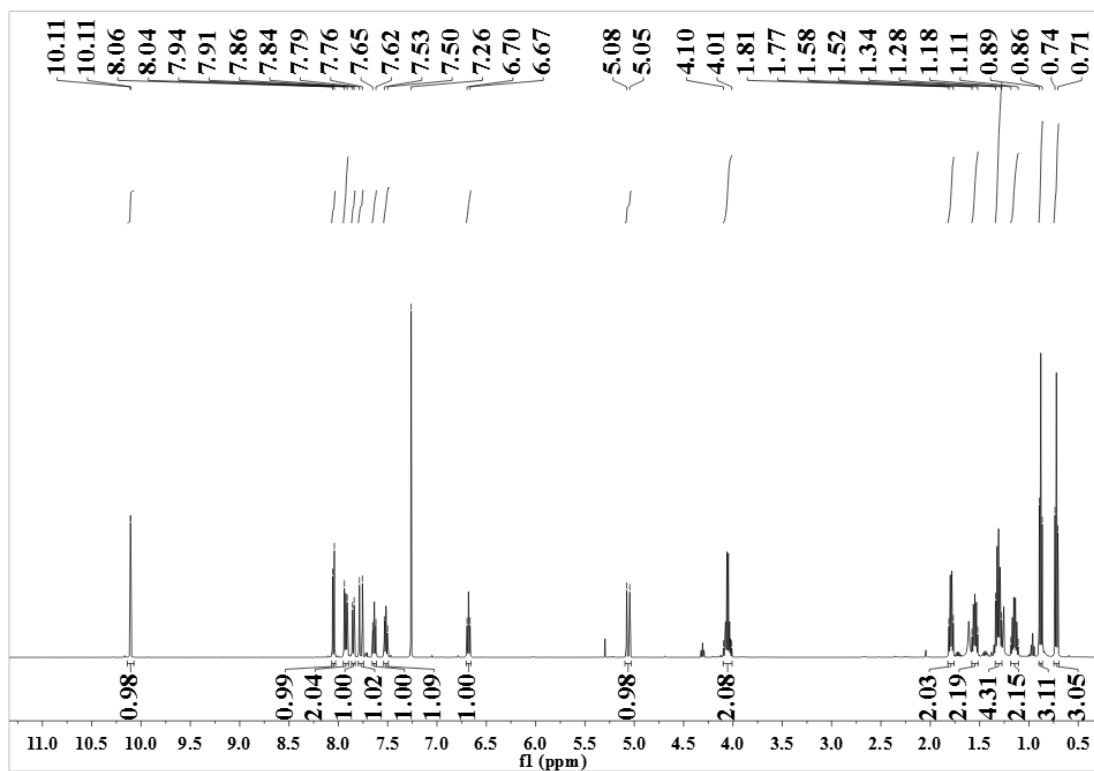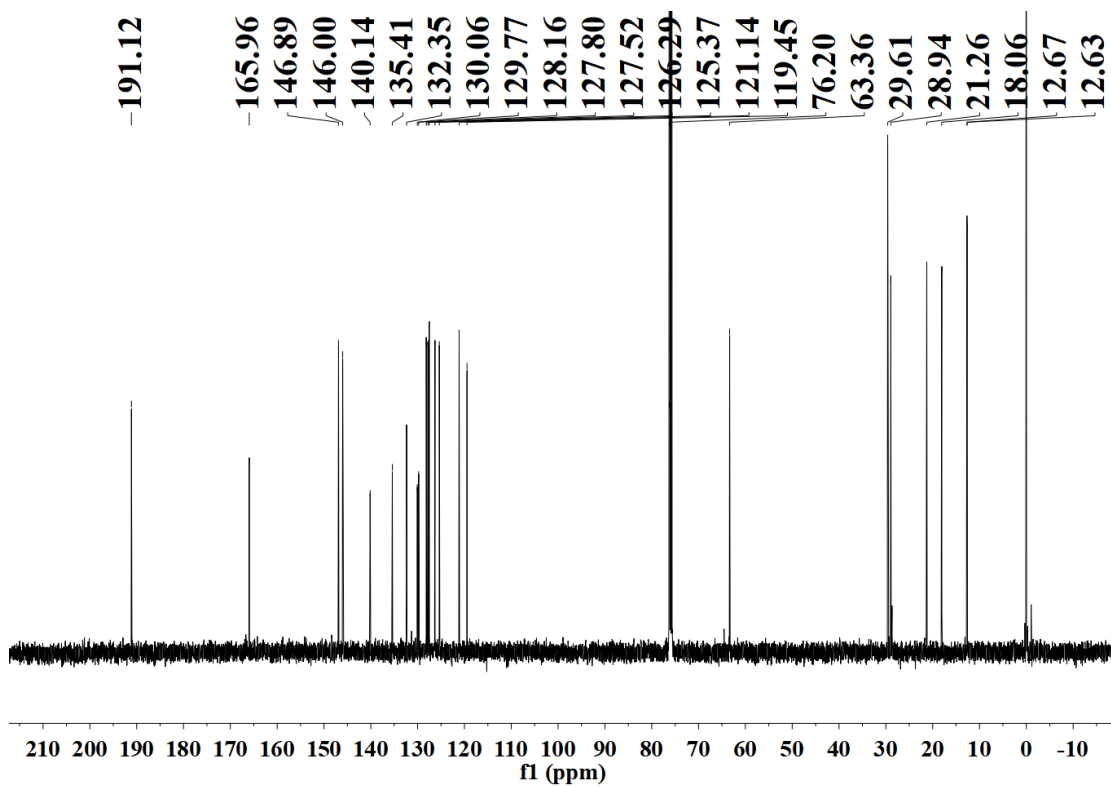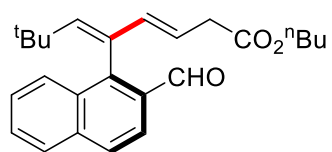



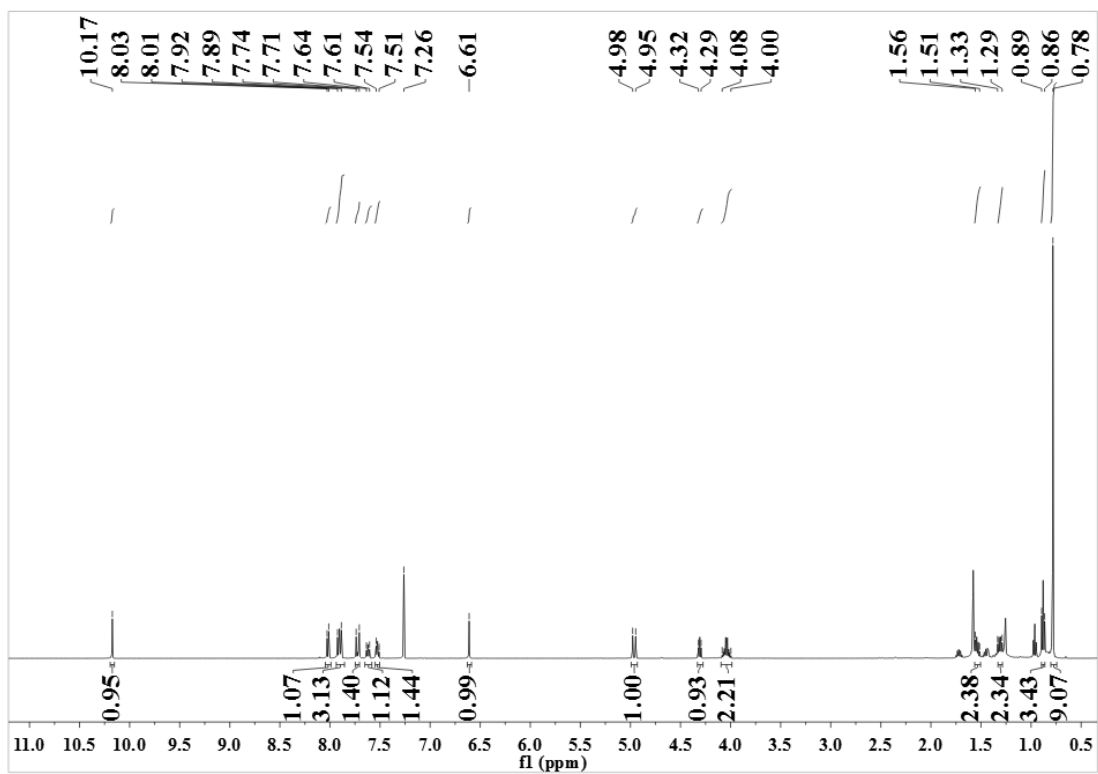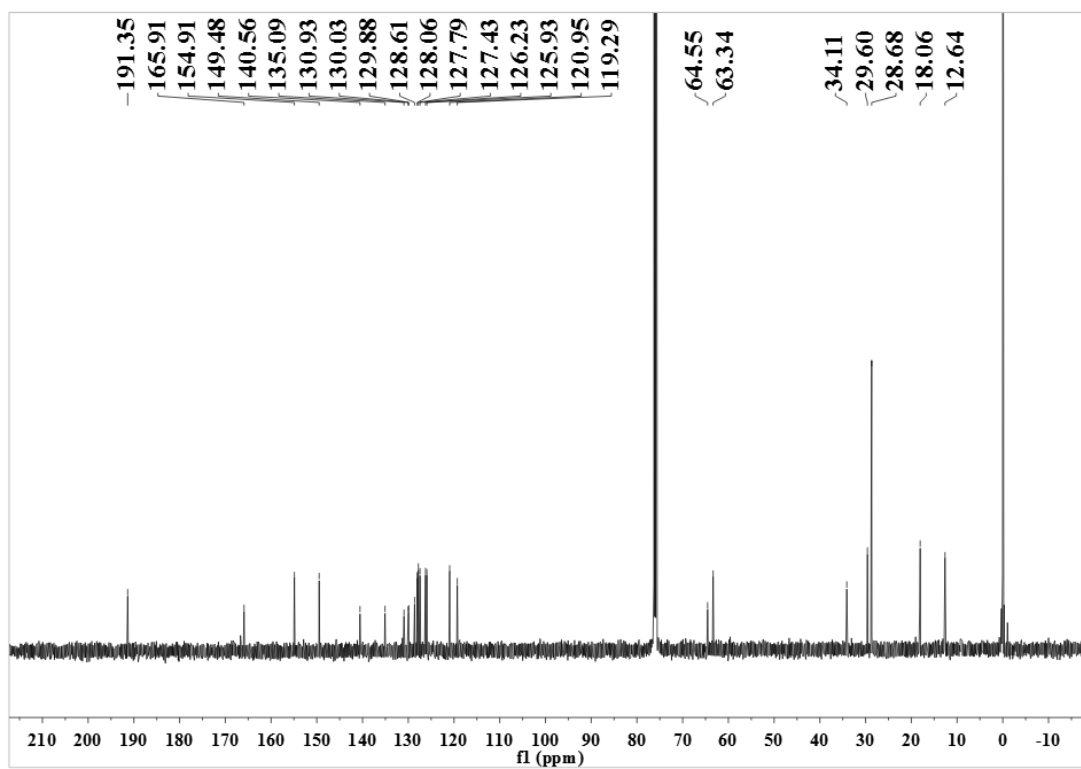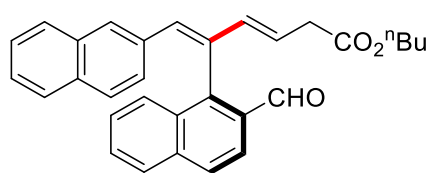

(3n)

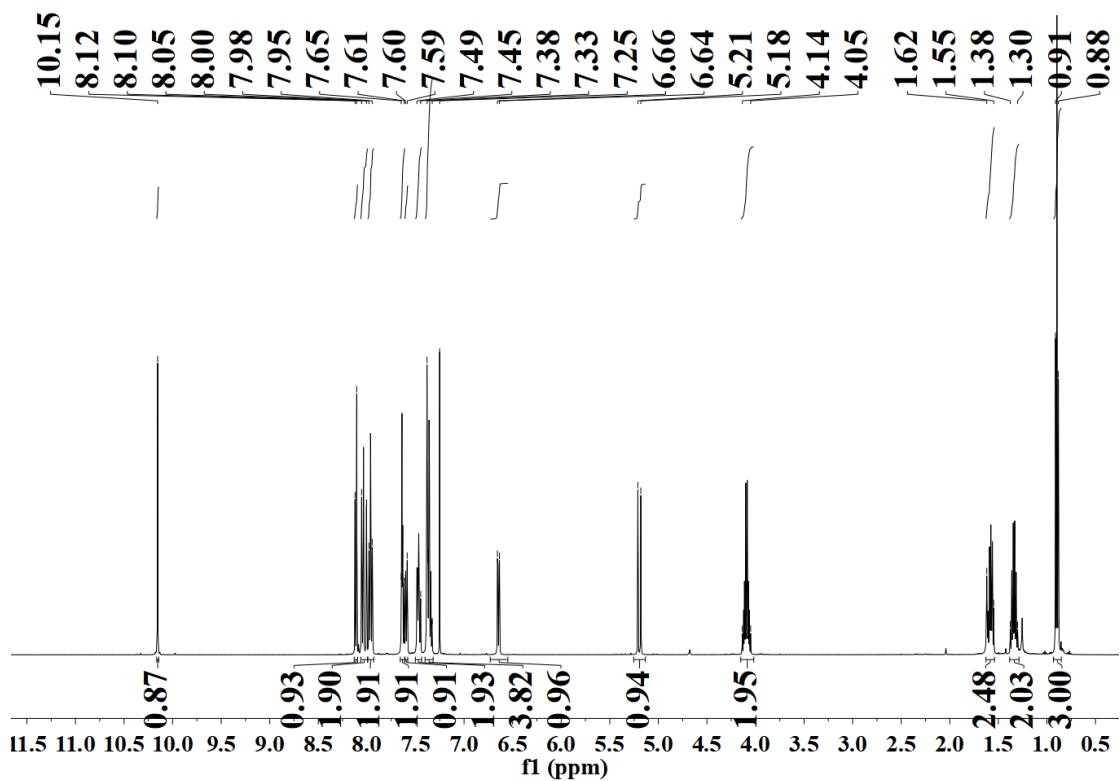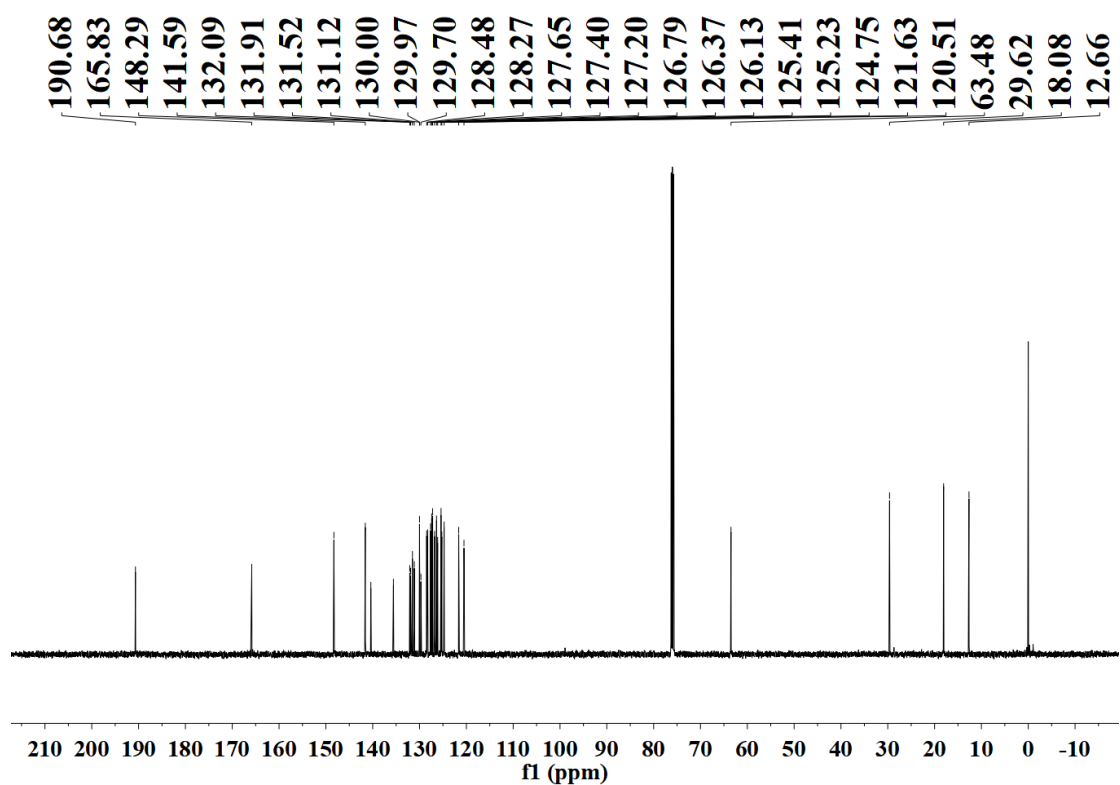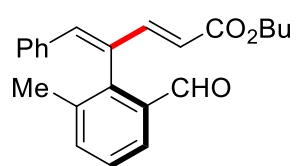

(30)

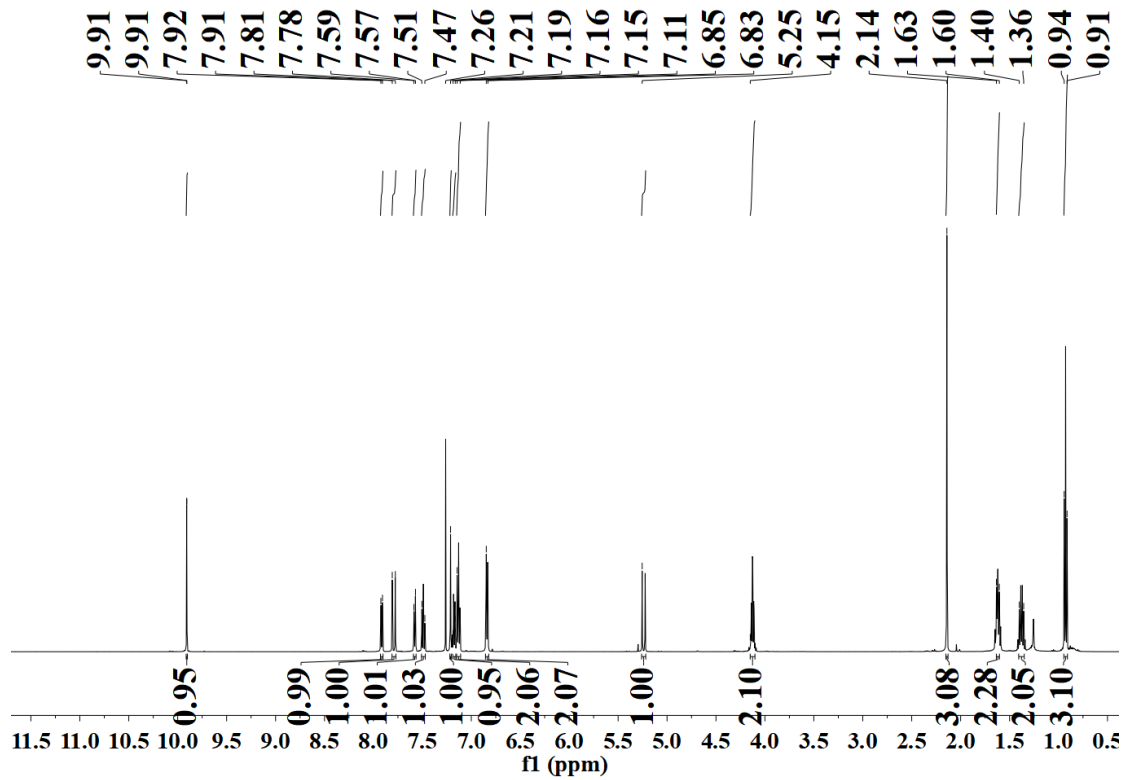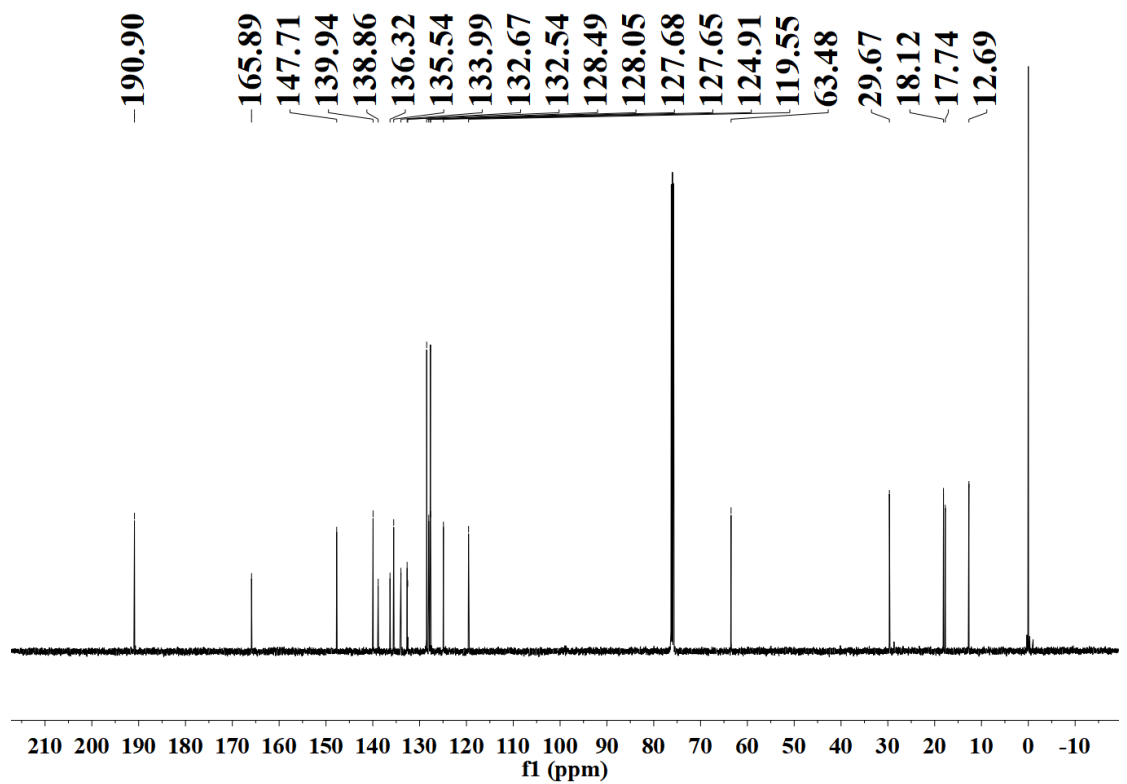

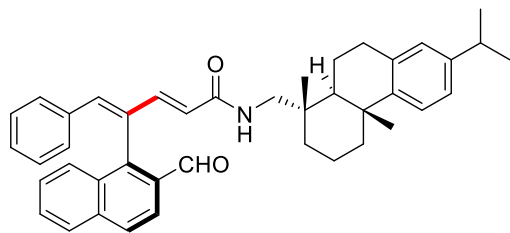

(3p)

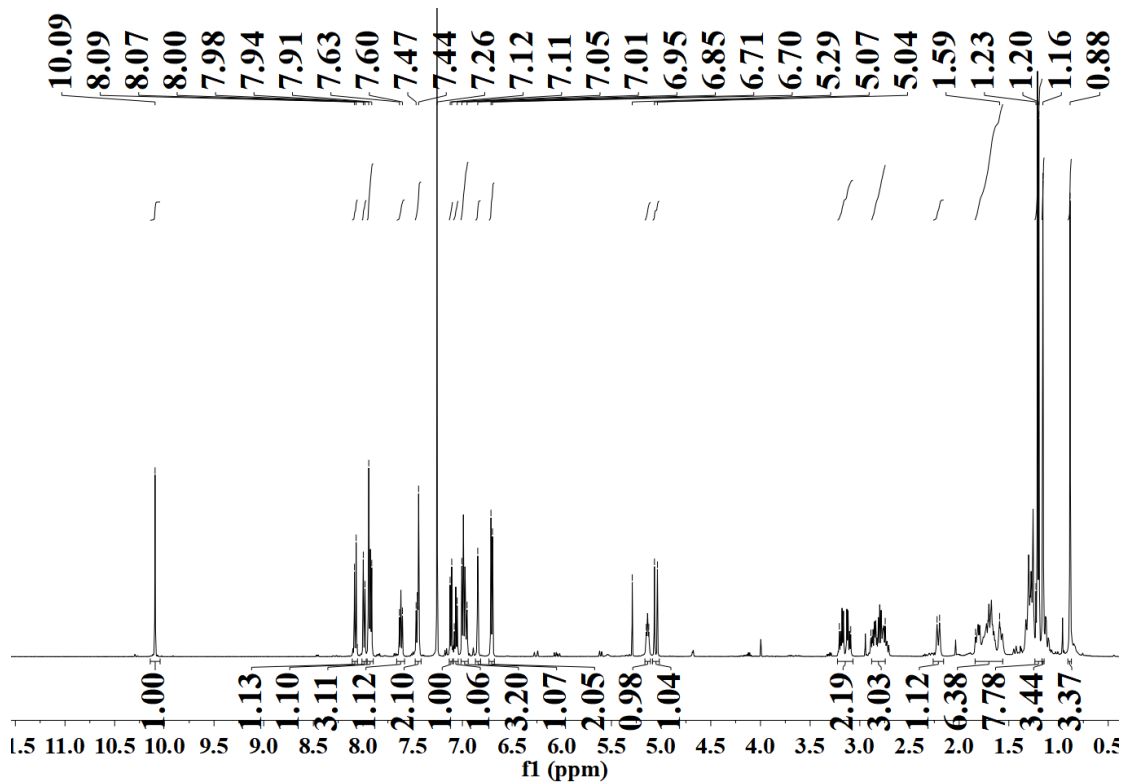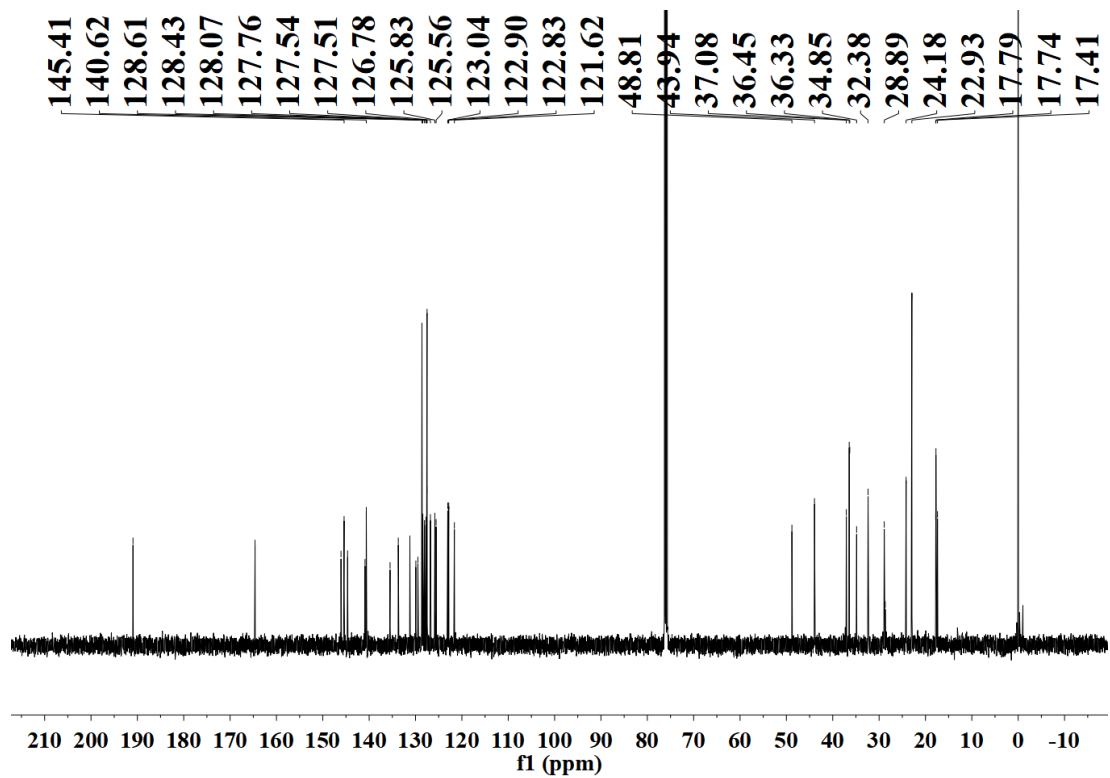

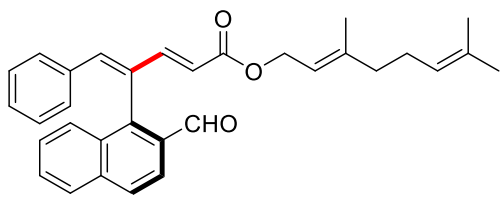

(3q)

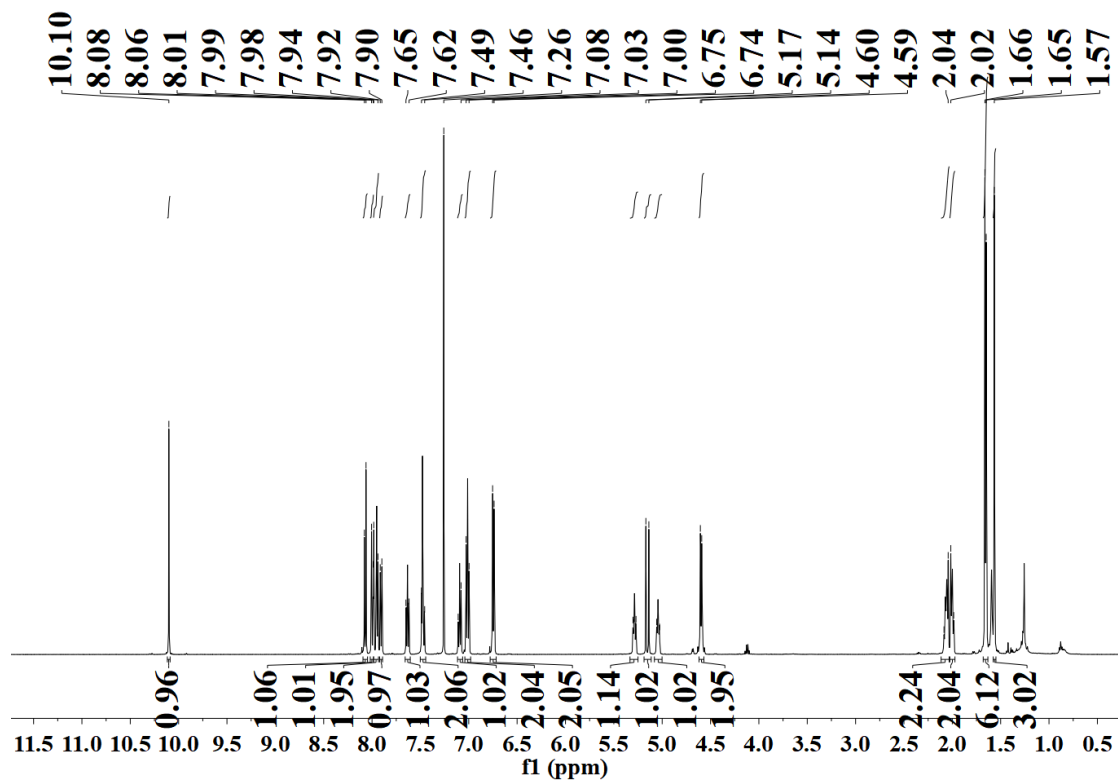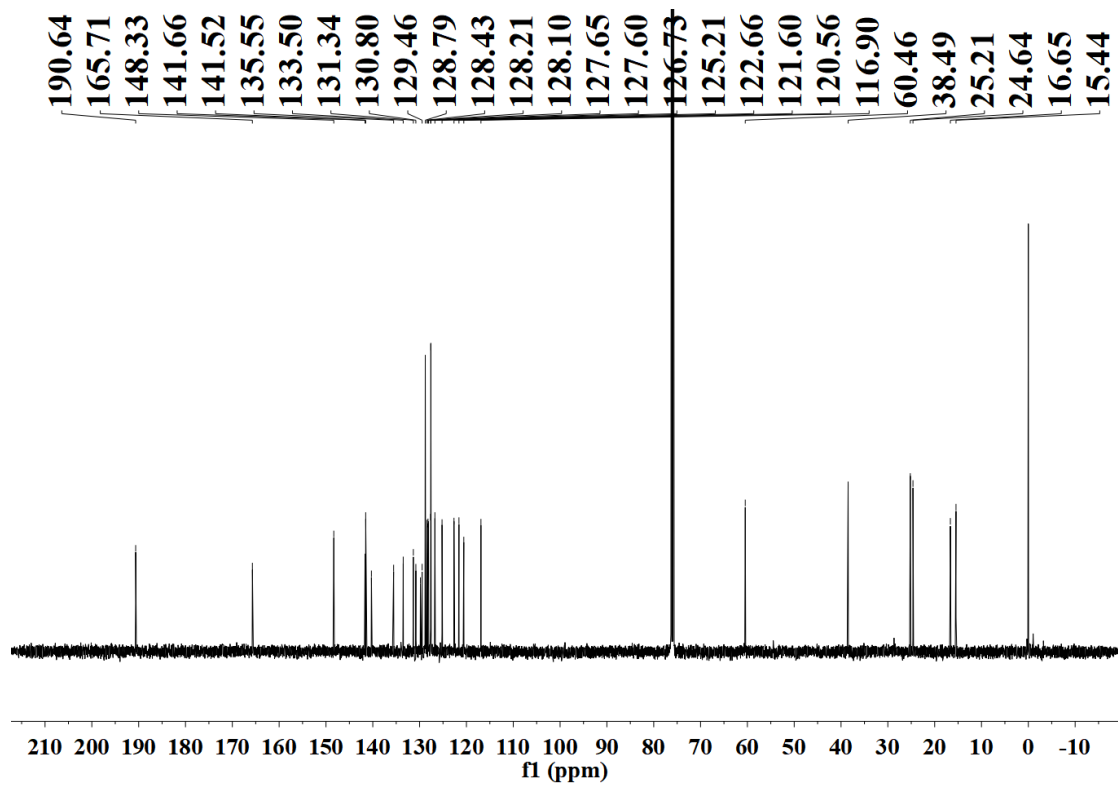

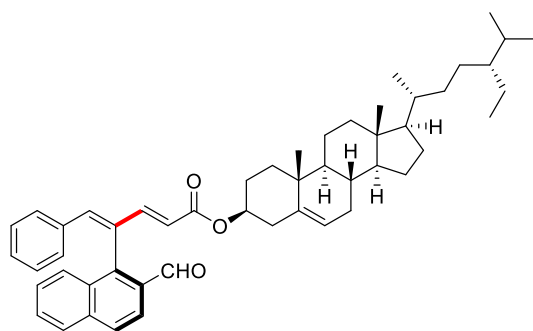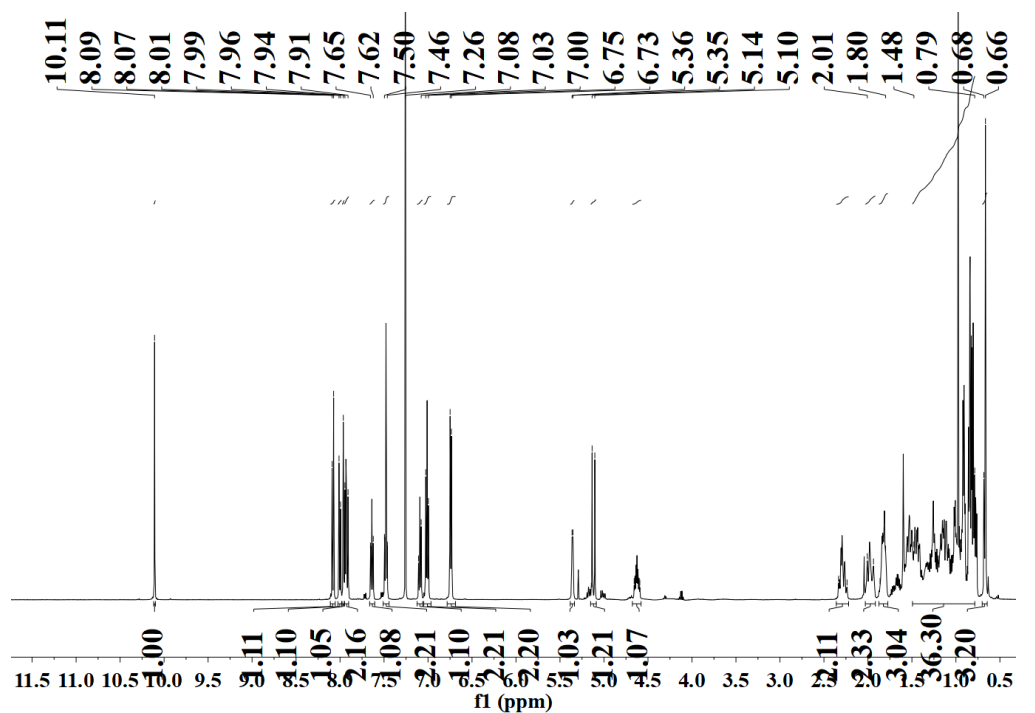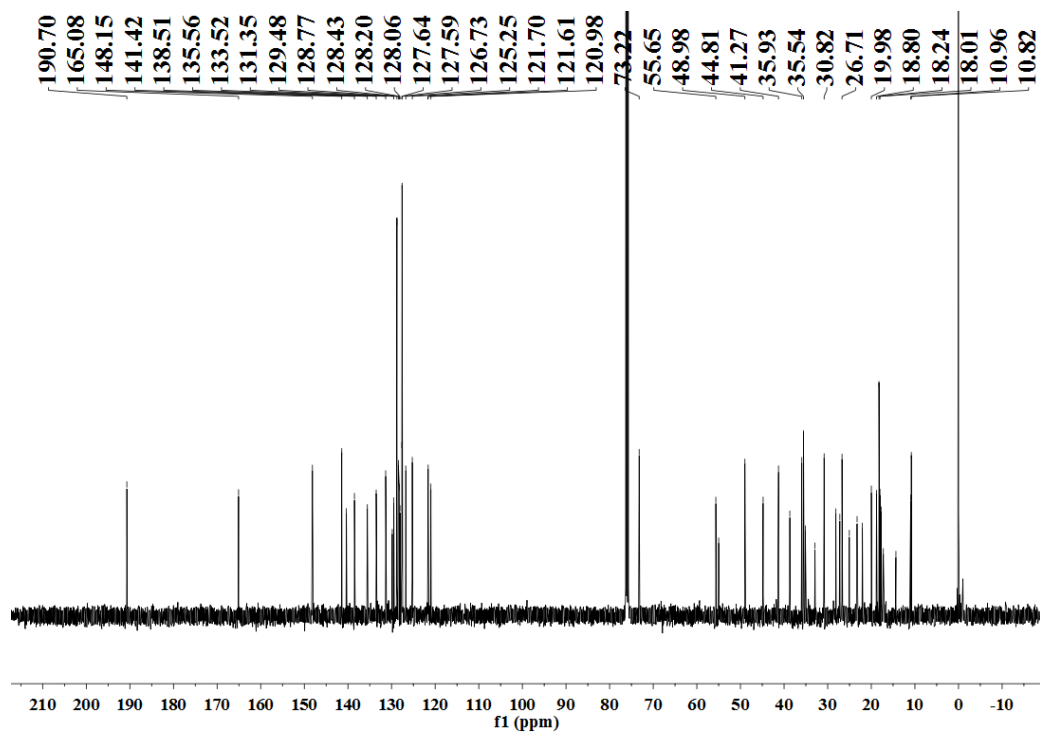

### 8.3 $^1\text{H}$ / $^{13}\text{C}$ NMR Charts of CCAs

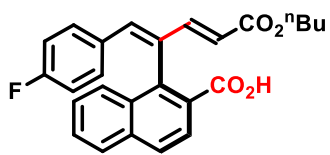

(4a)

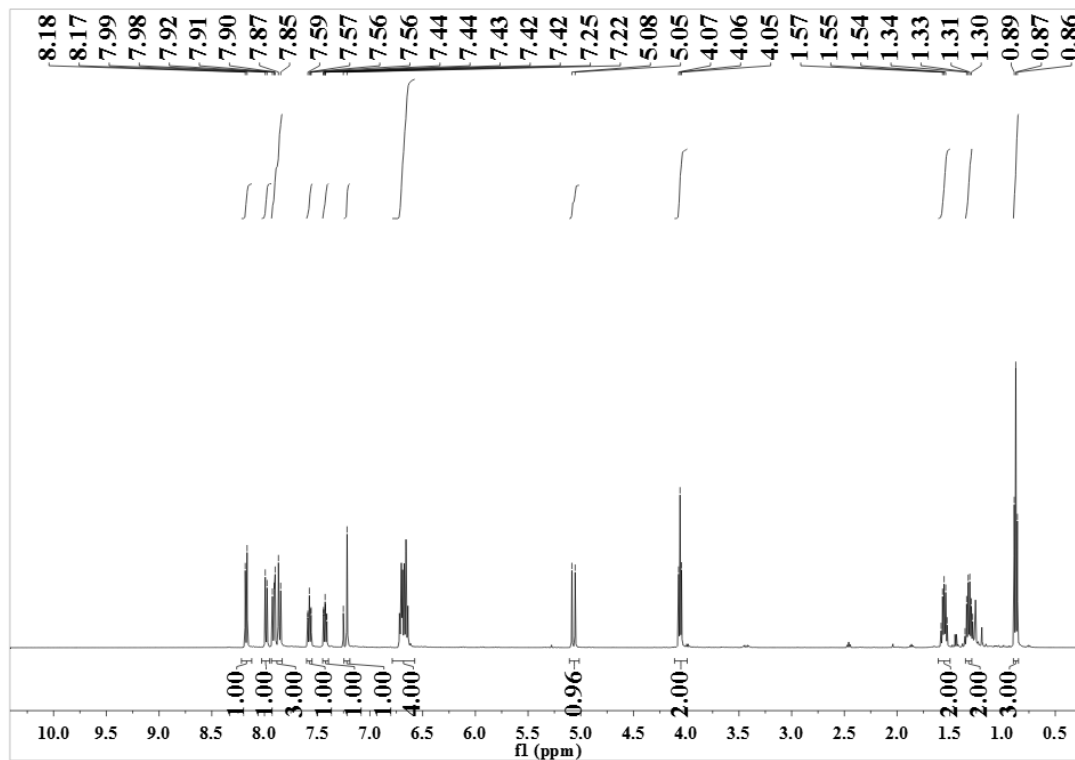

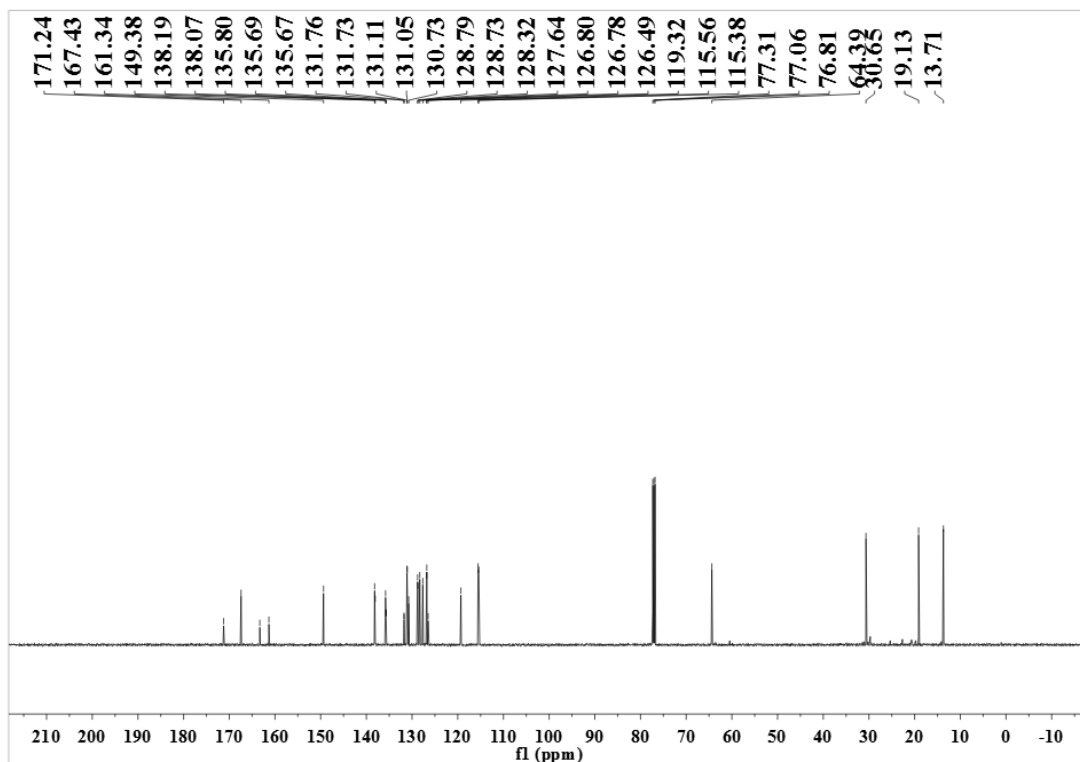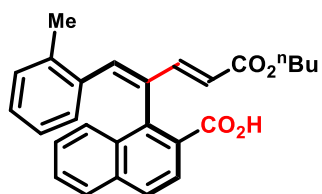

(4b)

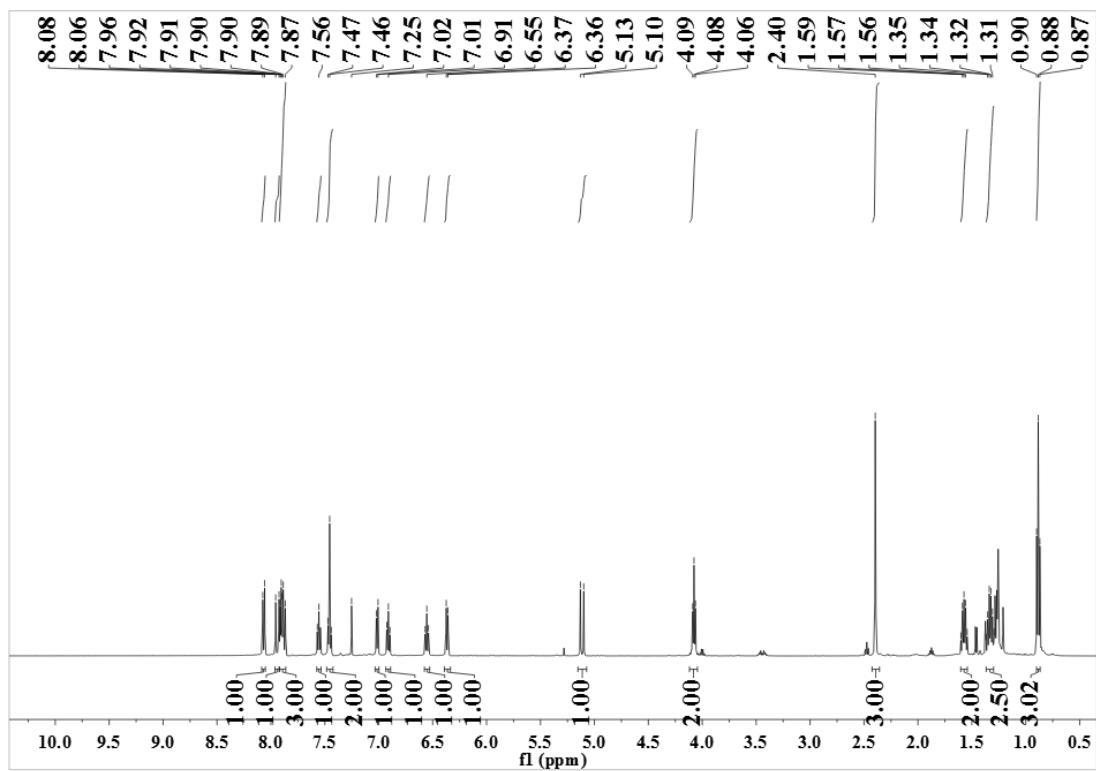



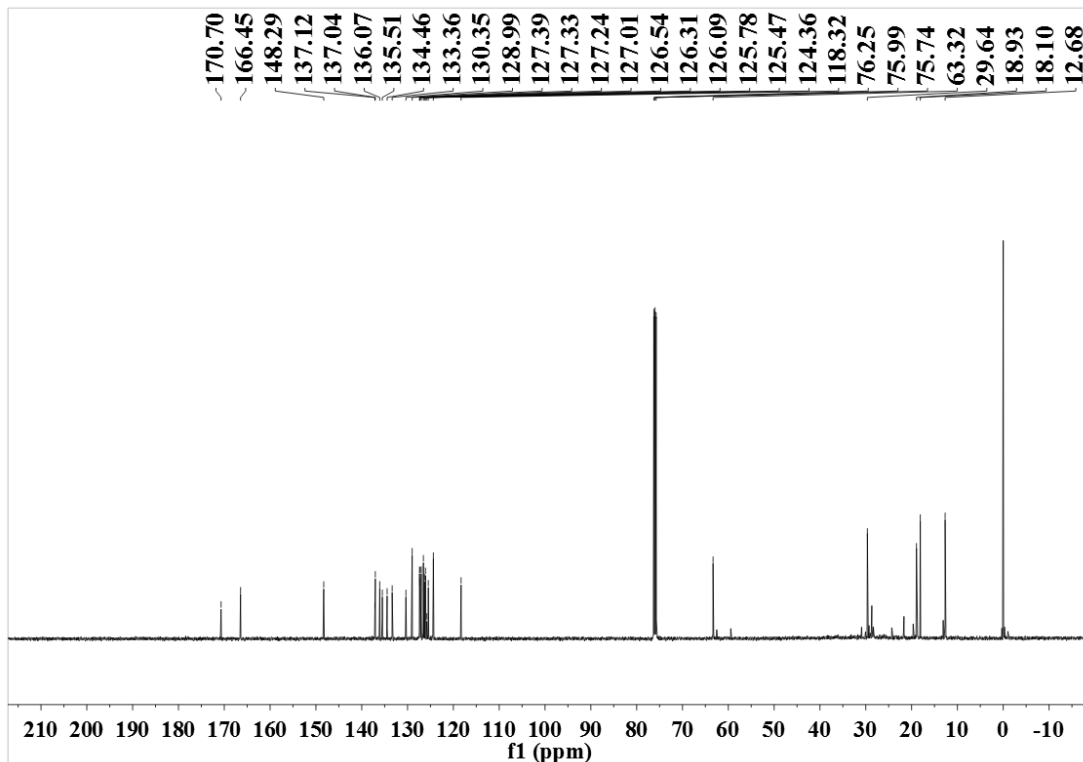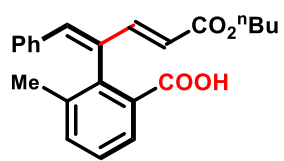

(4c)

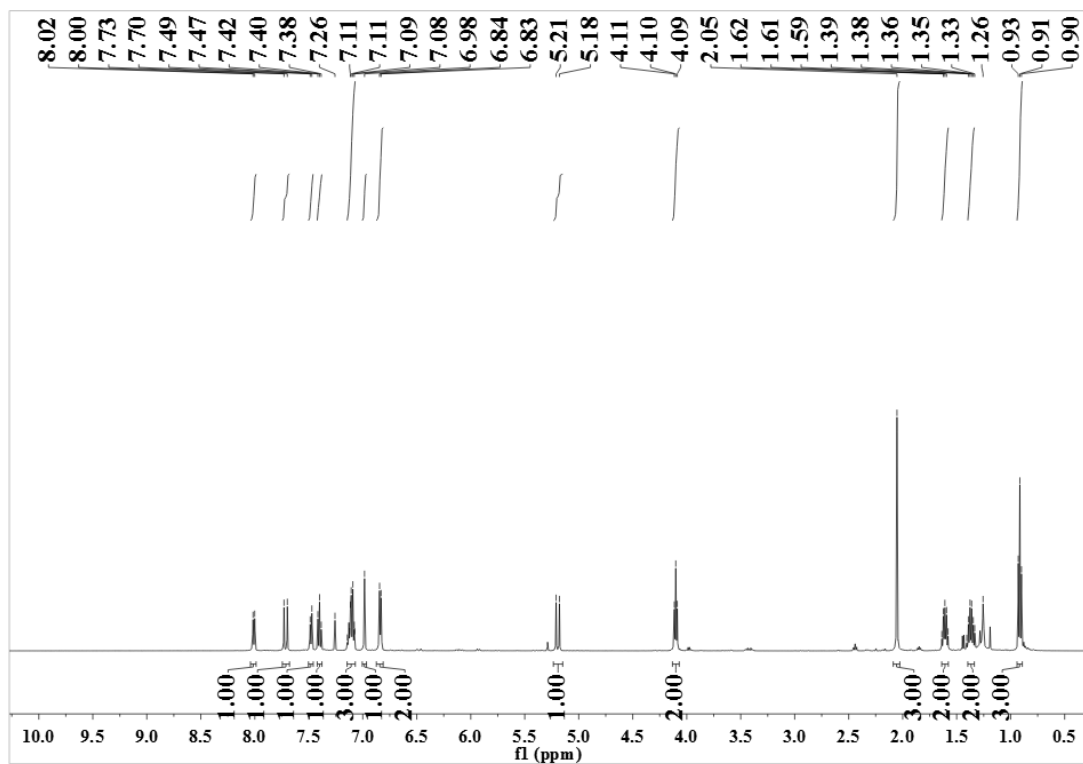

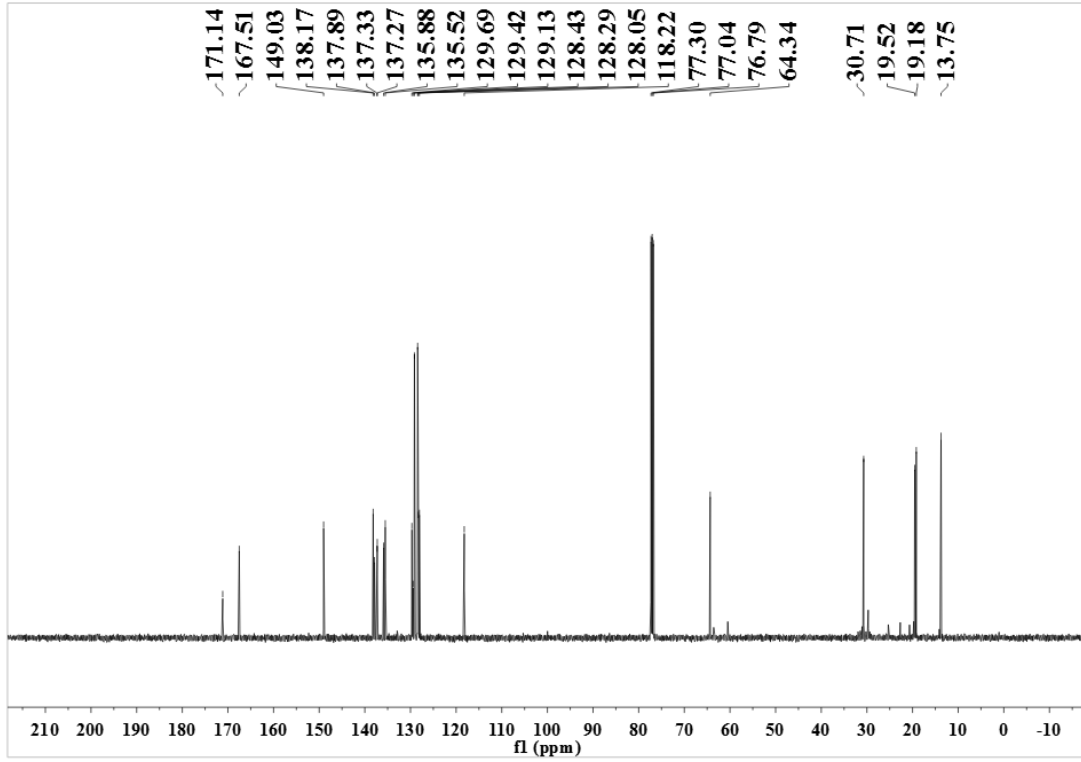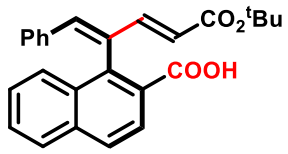

(4d)

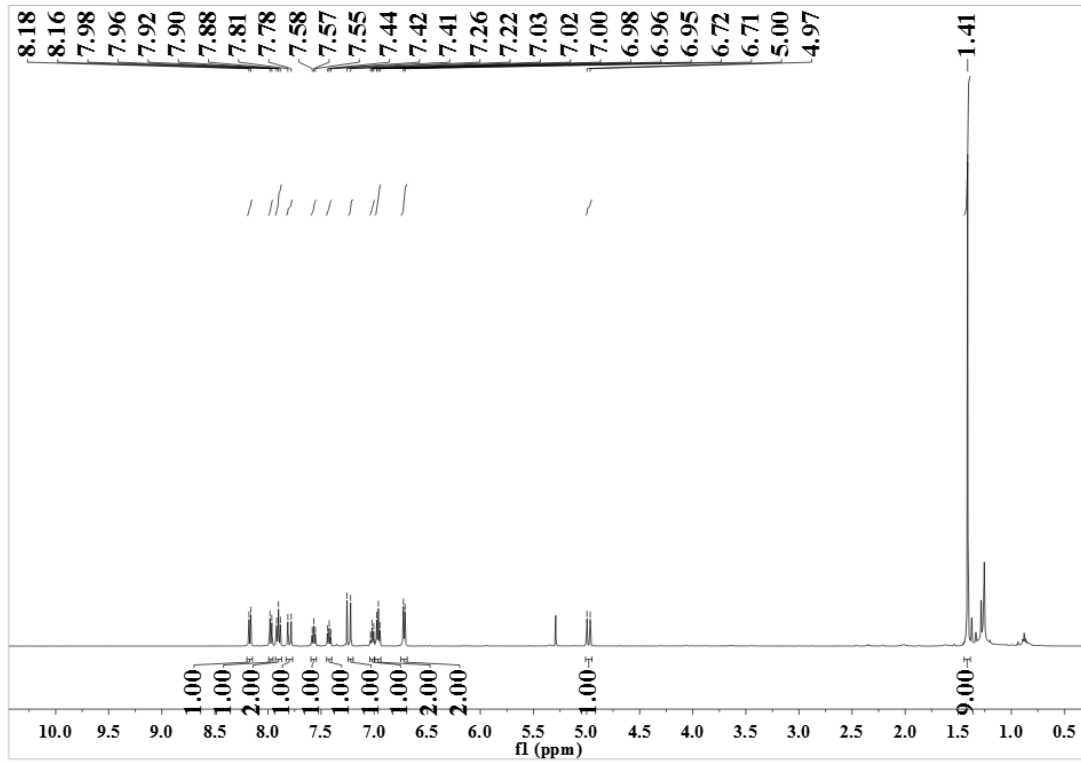

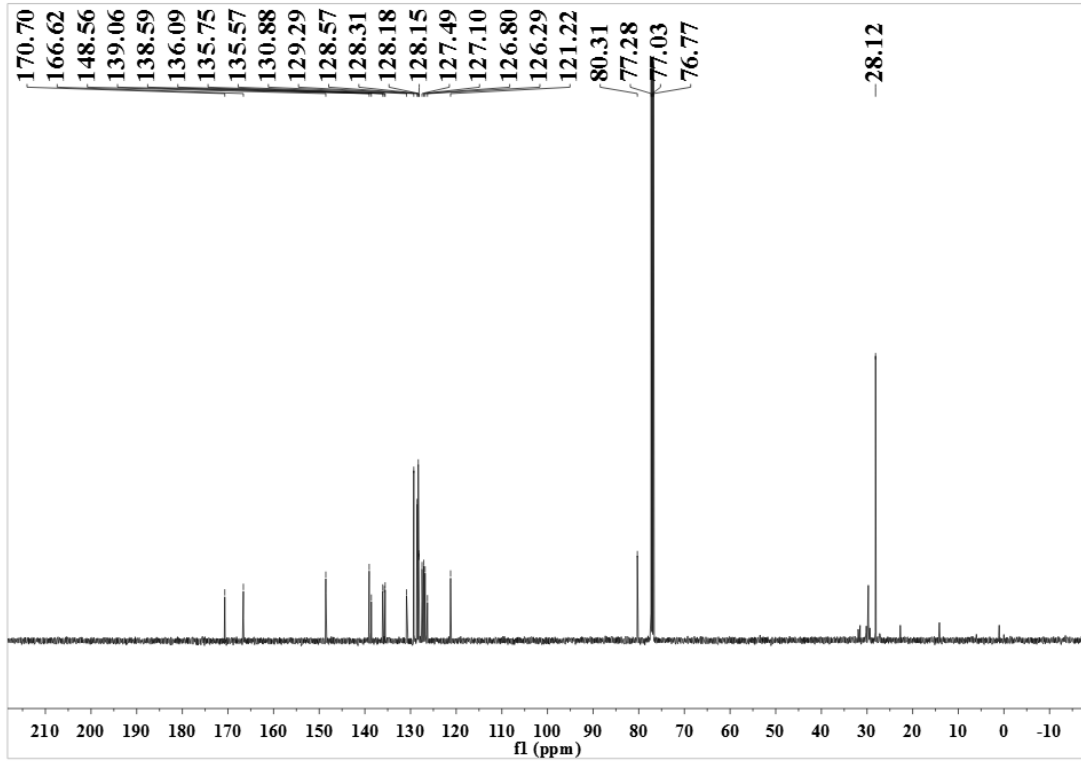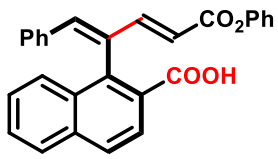

(4e)

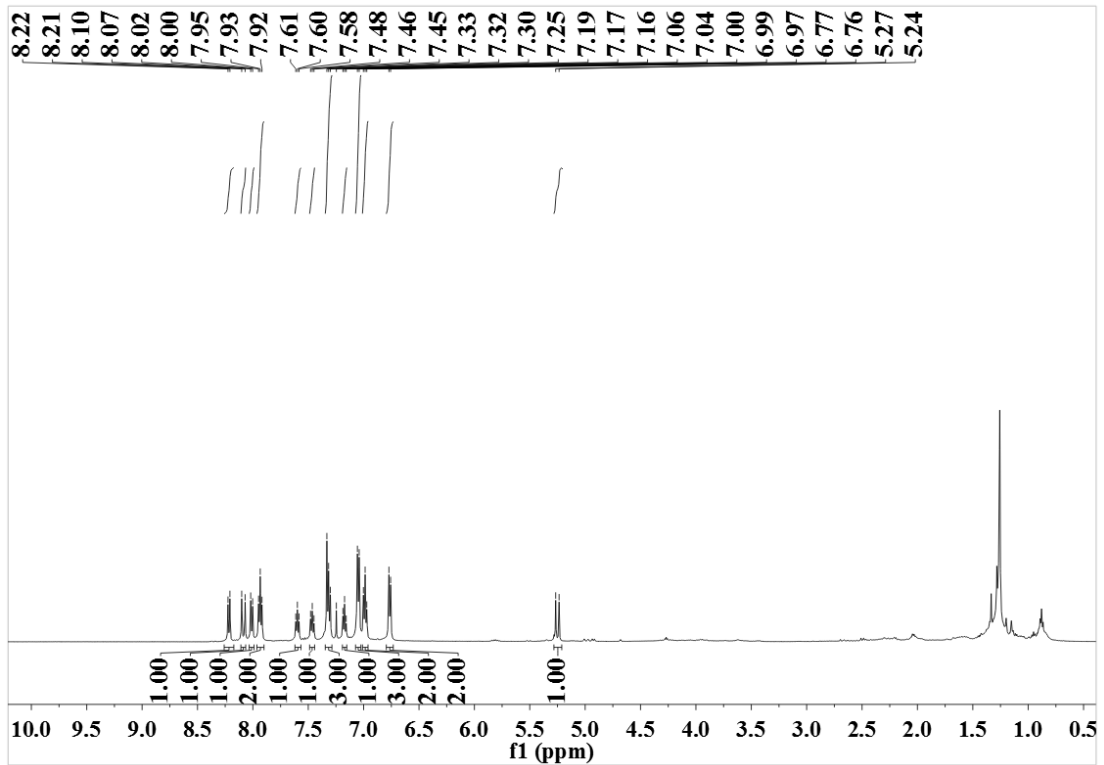

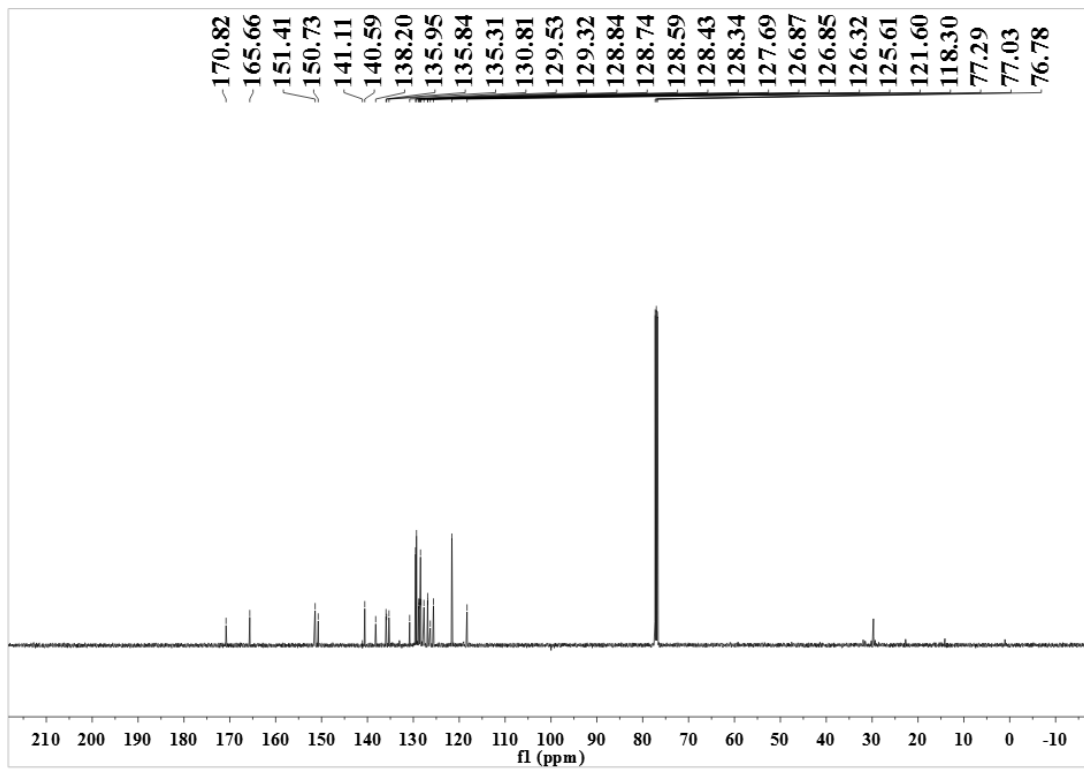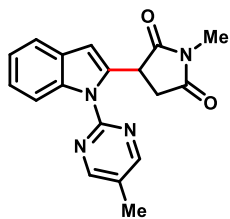

(7)

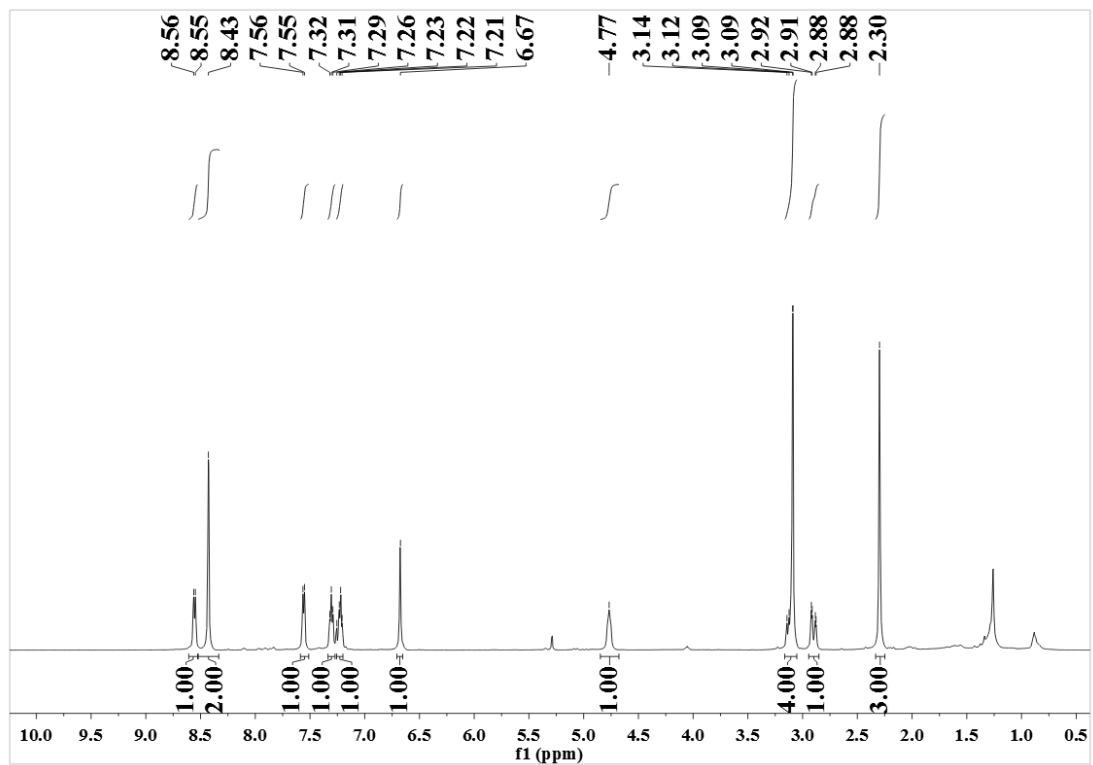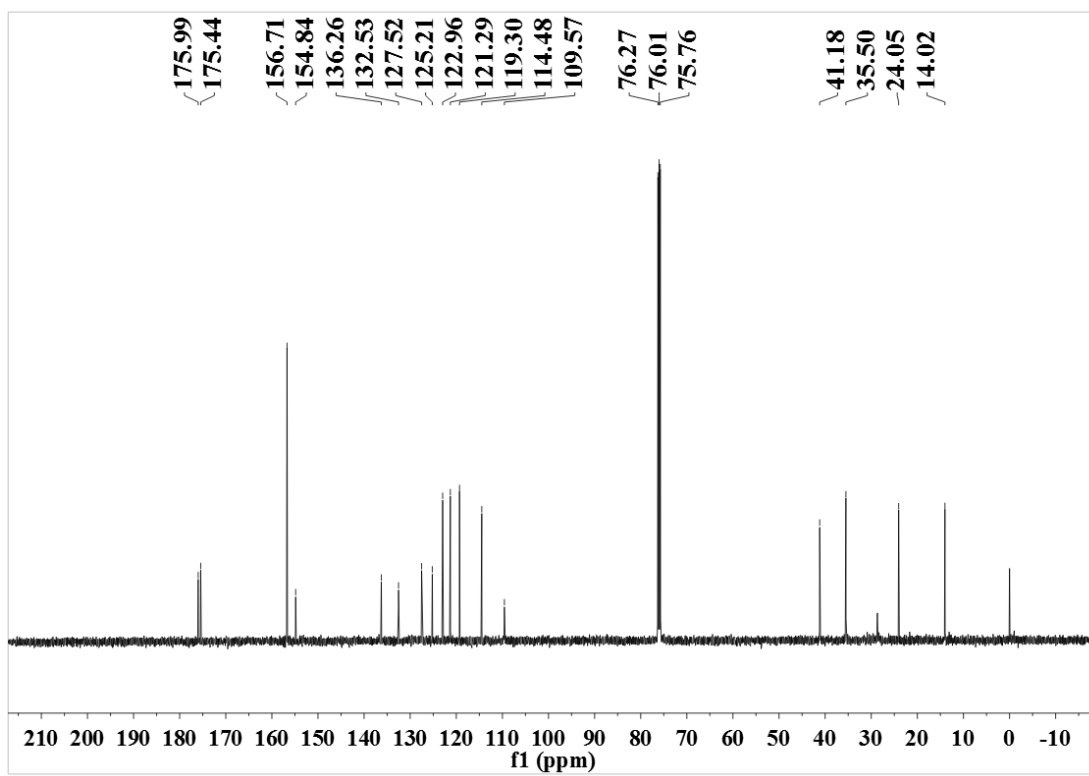

## 9. Copies of HPLC Analysis

### 9.1 HPLC Analysis of Products

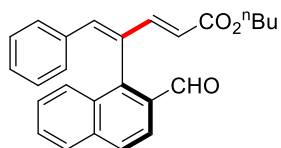

78%, 93% ee

Daicel Chiralpak IA-H column, n-hexane/i-PrOH (98/2), 1.0 mL/min, 254 nm, 15.526 min (major enantiomer), 16.693 min (minor enantiomer).

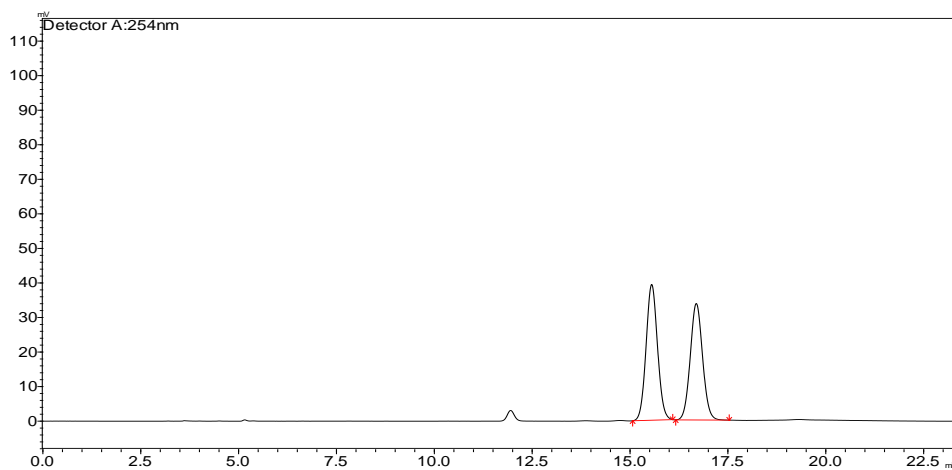

| Peak# | Ret. Time | Area    | Height | Area %  | Height % |
|-------|-----------|---------|--------|---------|----------|
| 1     | 15.548    | 798038  | 39311  | 51.937  | 53.822   |
| 2     | 16.688    | 738520  | 33729  | 48.063  | 46.178   |
| Total |           | 1536558 | 73040  | 100.000 | 100.000  |

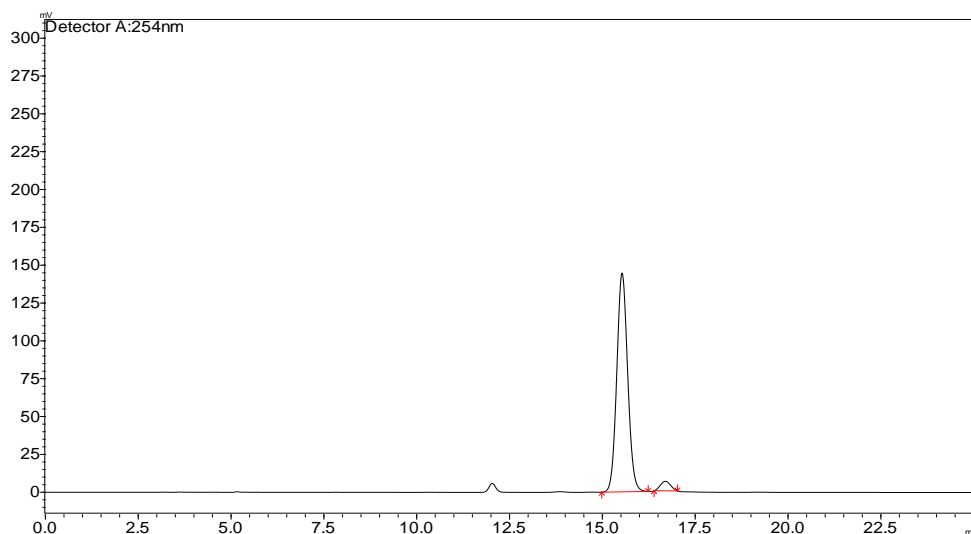

| Peak# | Ret. Time | Area | Height | Area % | Height % |
|-------|-----------|------|--------|--------|----------|
|-------|-----------|------|--------|--------|----------|

|       |        |         |        |         |         |
|-------|--------|---------|--------|---------|---------|
| 1     | 15.526 | 2952019 | 144542 | 96.063  | 95.812  |
| 2     | 16.693 | 120999  | 6318   | 3.937   | 4.188   |
| Total |        | 3073018 | 150860 | 100.000 | 100.000 |

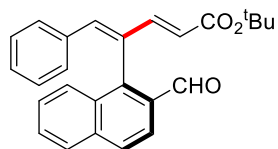

**3b**  
70%, 89% ee

Daicel Chiralpak IA-H column, n-hexane/*i*-PrOH (98/2), 1.0 mL/min, 254 nm, 13.283 min (major enantiomer), 14.281 min (minor enantiomer).

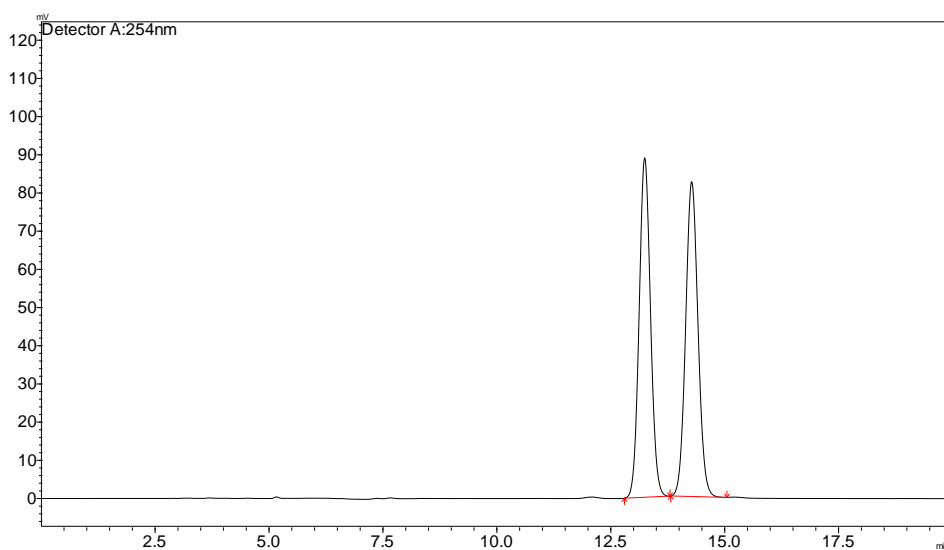

| Peak# | Ret. Time | Area    | Height | Area %  | Height % |
|-------|-----------|---------|--------|---------|----------|
| 1     | 13.240    | 1540444 | 88885  | 49.810  | 51.885   |
| 2     | 14.272    | 1552191 | 82427  | 50.190  | 48.115   |
| Total |           | 3092635 | 171312 | 100.000 | 100.000  |

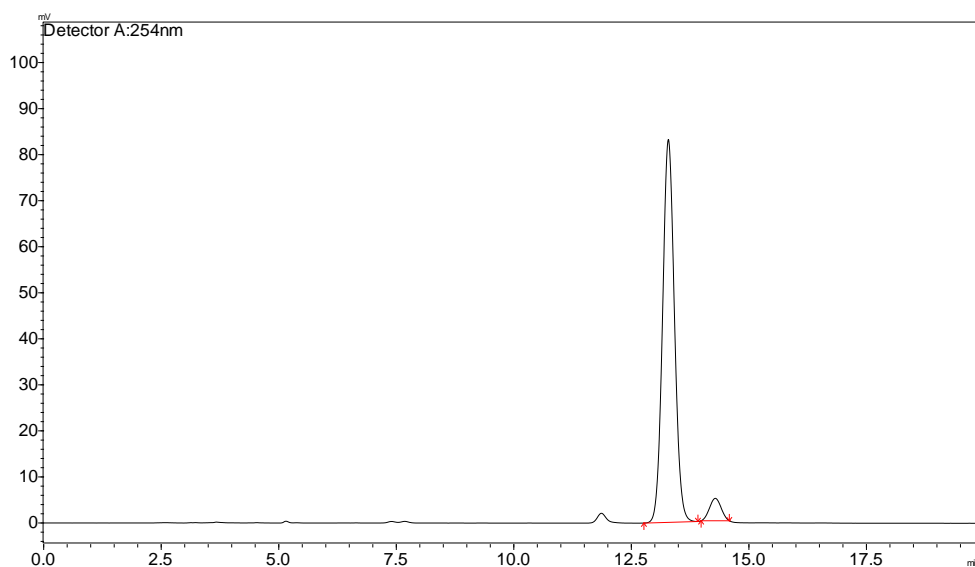

| Peak# | Ret. Time | Area    | Height | Area % | Height % |
|-------|-----------|---------|--------|--------|----------|
| 1     | 13.240    | 1540444 | 88885  | 49.810 | 51.885   |

|       |        |         |       |         |         |
|-------|--------|---------|-------|---------|---------|
| 1     | 13.283 | 1457625 | 83157 | 94.588  | 94.472  |
| 2     | 14.281 | 83394   | 4866  | 5.412   | 5.528   |
| Total |        | 1541020 | 88022 | 100.000 | 100.000 |

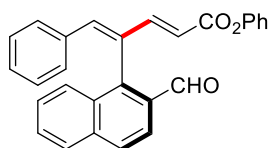

**3c**  
92%, 89% ee

Daicel Chiralpak IA-H column, n-hexane/*i*-PrOH (95/5), 1.0 mL/min, 254 nm, 12.395 min (major enantiomer), 13.416 min (minor enantiomer).

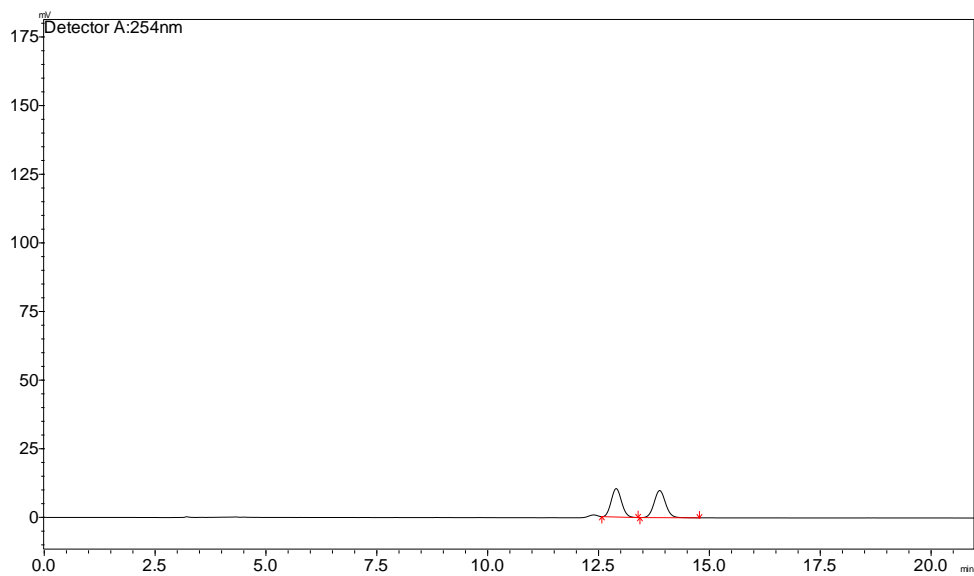

| Peak# | Ret. Time | Area   | Height | Area %  | Height % |
|-------|-----------|--------|--------|---------|----------|
| 1     | 12.894    | 167921 | 10352  | 48.572  | 51.170   |
| 2     | 13.874    | 177793 | 9879   | 51.428  | 48.830   |
| Total |           | 345713 | 20231  | 100.000 | 100.000  |

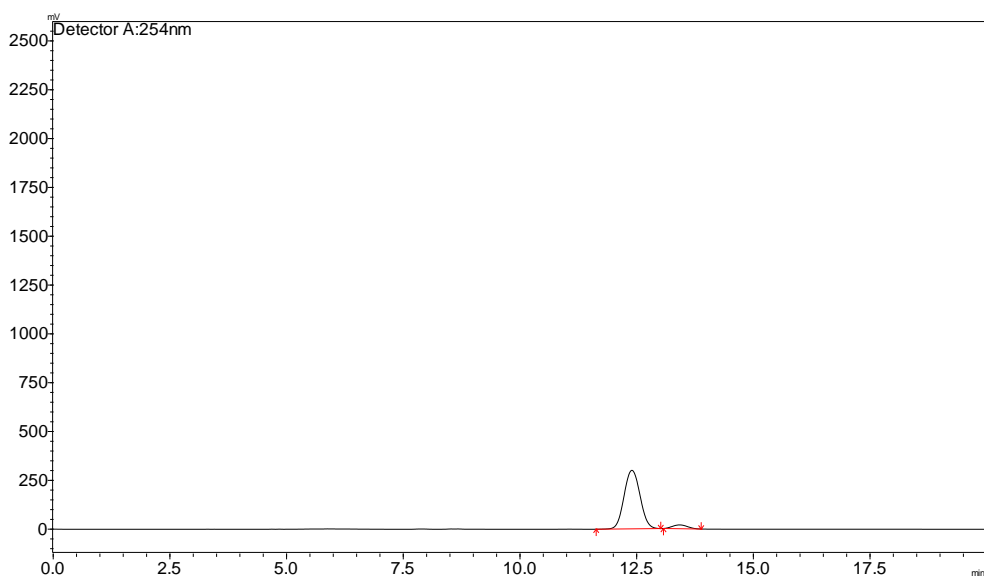

| Peak# | Ret. Time | Area | Height | Area % | Height % |
|-------|-----------|------|--------|--------|----------|
| 1     | 12.395    |      |        |        |          |
| 2     | 13.416    |      |        |        |          |



|       |        |         |        |         |         |
|-------|--------|---------|--------|---------|---------|
| 1     | 12.395 | 7140568 | 299680 | 94.211  | 93.905  |
| 2     | 13.416 | 438801  | 19451  | 5.789   | 6.095   |
| Total |        | 7579369 | 319131 | 100.000 | 100.000 |

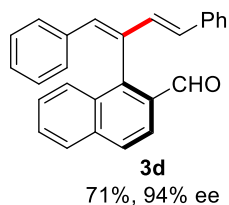

Daicel Chiralpak IA-H column, n-hexane/*i*-PrOH (98/2), 1.0 mL/min, 254 nm, 13.965 min (major enantiomer), 16.944 min (minor enantiomer).

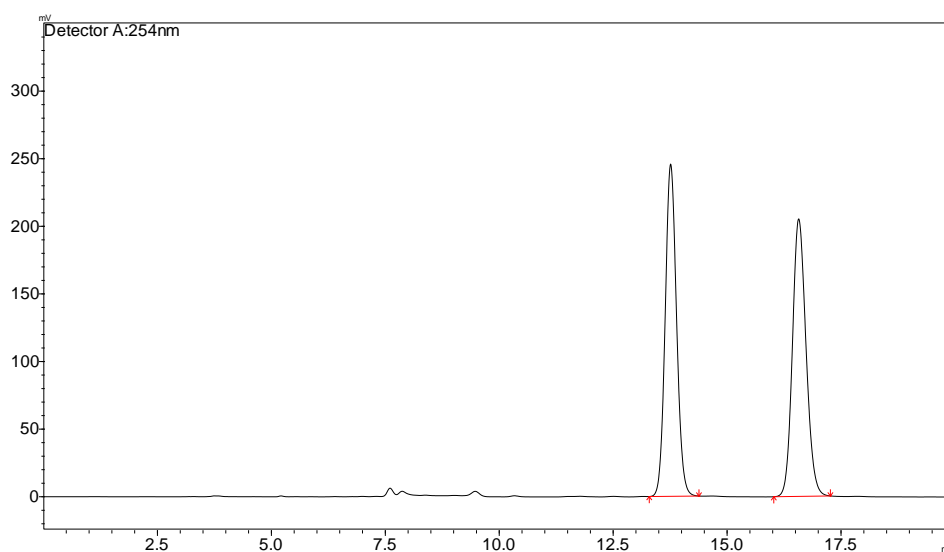

| Peak# | Ret. Time | Area    | Height | Area %  | Height % |
|-------|-----------|---------|--------|---------|----------|
| 1     | 13.757    | 4249850 | 245725 | 49.923  | 54.494   |
| 2     | 16.567    | 4262877 | 205195 | 50.077  | 45.506   |
| Total |           | 8512727 | 450920 | 100.000 | 100.000  |

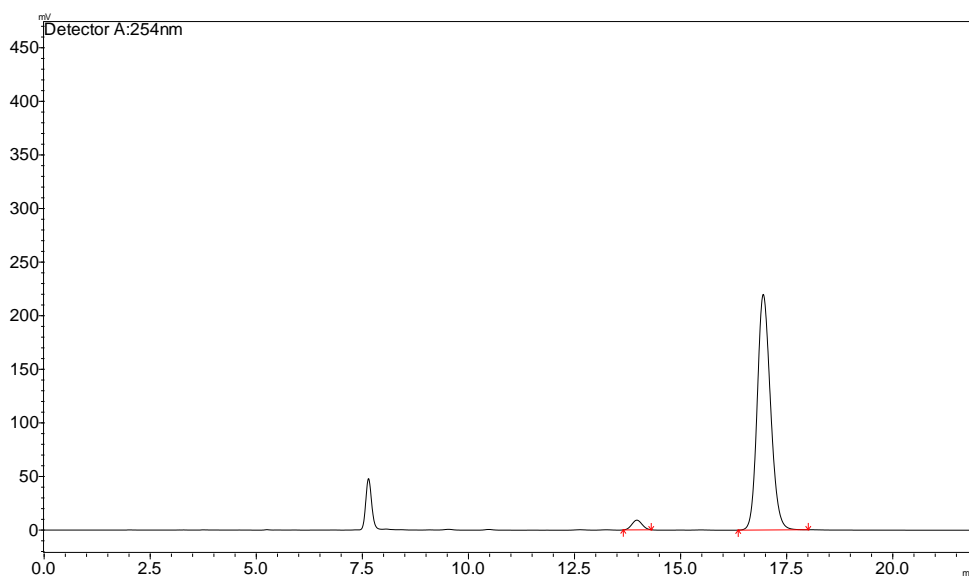

| Peak# | Ret. Time | Area | Height | Area % | Height % |
|-------|-----------|------|--------|--------|----------|
| 1     | 7.5       |      |        |        |          |
| 2     | 16.567    |      |        |        |          |

|       |        |         |        |         |         |
|-------|--------|---------|--------|---------|---------|
| 1     | 13.965 | 152572  | 9052   | 3.090   | 3.955   |
| 2     | 16.944 | 4784447 | 219842 | 96.910  | 96.045  |
| Total |        | 4937019 | 228894 | 100.000 | 100.000 |

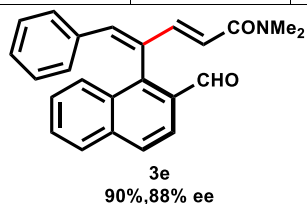

Daicel Chiralpak OD-H column, n-hexane/*i*-PrOH (90/10), 1.0 mL/min, 254 nm, 16.816 min (major enantiomer), 19.483 min (minor enantiomer).

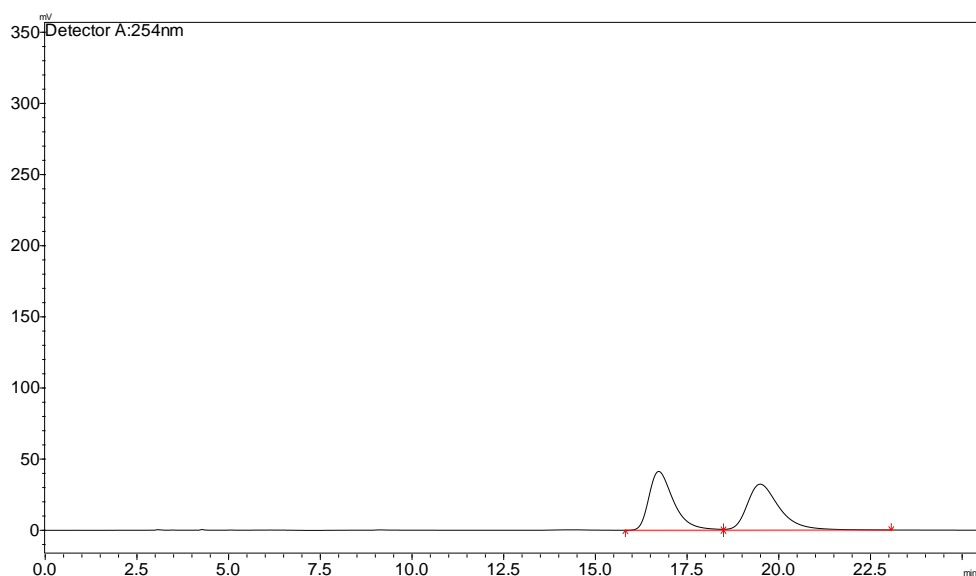

| Peak# | Ret. Time | Area    | Height | Area %  | Height % |
|-------|-----------|---------|--------|---------|----------|
| 1     | 16.722    | 1929336 | 41307  | 49.448  | 56.115   |
| 2     | 19.489    | 1972399 | 32304  | 50.552  | 43.885   |
| Total |           | 3901734 | 73612  | 100.000 | 100.000  |

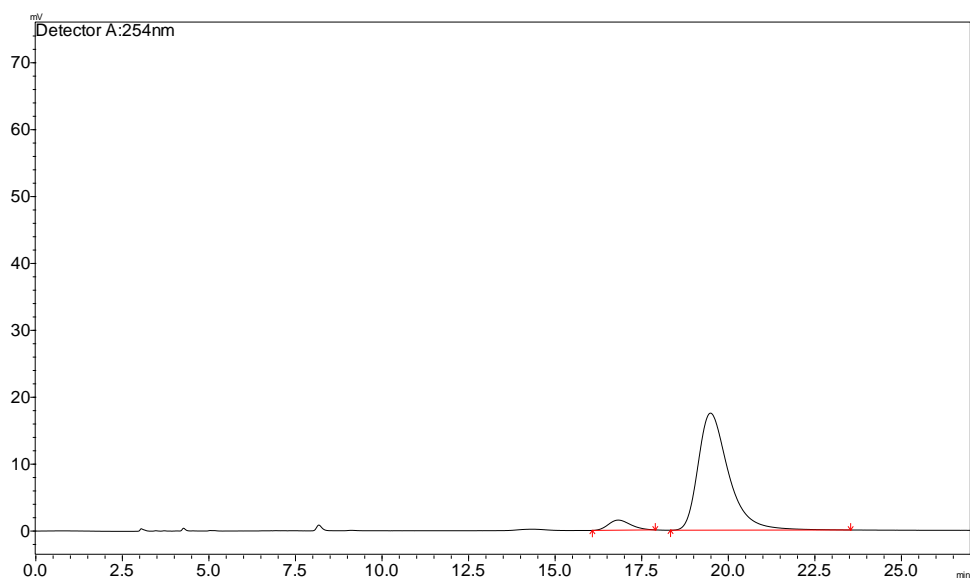

| Peak# | Ret. Time | Area  | Height | Area % | Height % |
|-------|-----------|-------|--------|--------|----------|
| 1     | 16.816    | 67875 | 1510   | 5.965  | 7.946    |

|       |        |         |       |         |         |
|-------|--------|---------|-------|---------|---------|
| 2     | 19.483 | 1070105 | 17498 | 94.035  | 92.054  |
| Total |        | 1137980 | 19008 | 100.000 | 100.000 |

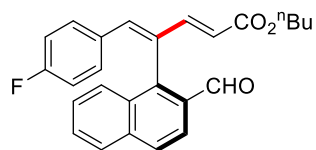

**3f**  
91%, 94% ee

Daicel Chiralpak IA-H column, n-hexane/i-PrOH (98/2), 1.0 mL/min, 254 nm, 17.686 min (major enantiomer), 19.934 min (minor enantiomer).

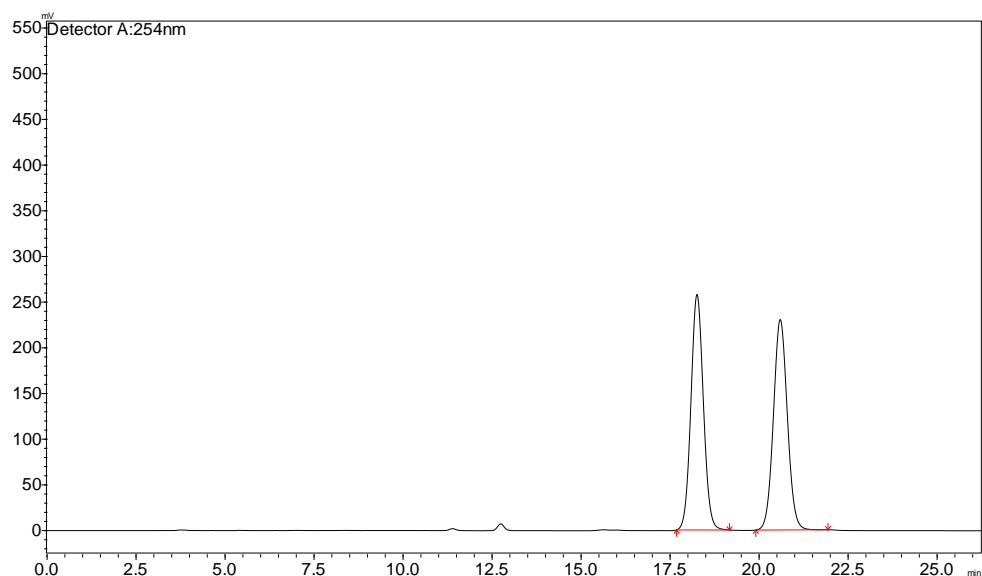

| Peak# | Ret. Time | Area     | Height | Area %  | Height % |
|-------|-----------|----------|--------|---------|----------|
| 1     | 18.252    | 6261635  | 257767 | 49.963  | 52.812   |
| 2     | 20.589    | 6270953  | 230320 | 50.037  | 47.188   |
| Total |           | 12532588 | 488087 | 100.000 | 100.000  |

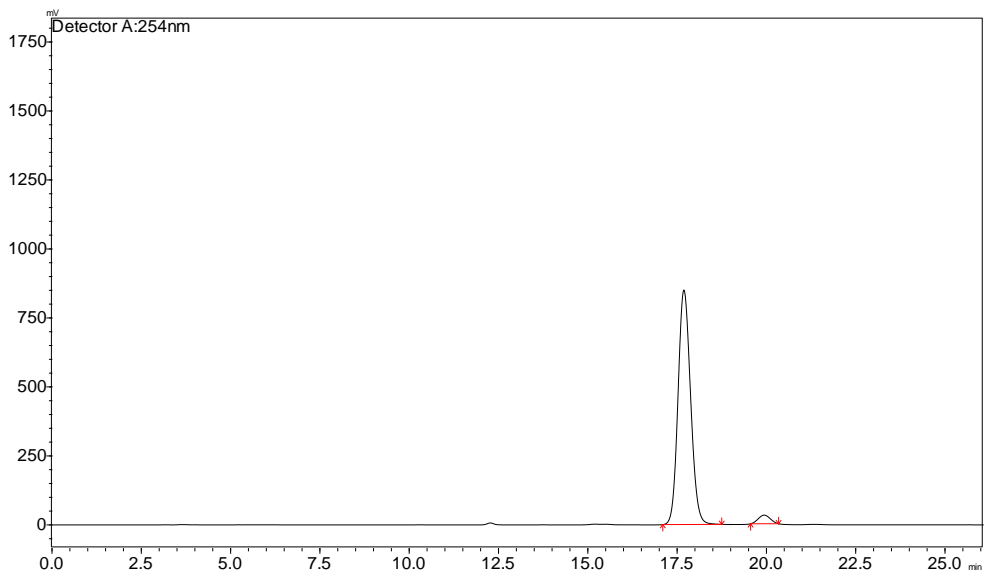

| Peak# | Ret. Time | Area     | Height | Area % | Height % |
|-------|-----------|----------|--------|--------|----------|
| 1     | 17.686    | 20773374 | 849917 | 96.613 | 96.446   |

|       |        |          |        |         |         |
|-------|--------|----------|--------|---------|---------|
| 2     | 19.934 | 728182   | 31318  | 3.387   | 3.554   |
| Total |        | 21501556 | 881235 | 100.000 | 100.000 |

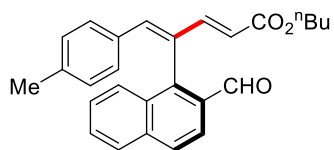

**3g**  
82%, 83% ee

Daicel Chiralpak IA-H column, n-hexane/i-PrOH (99/1), 1.0 mL/min, 254 nm, 21.062 min (major enantiomer), 23.744 min (minor enantiomer).

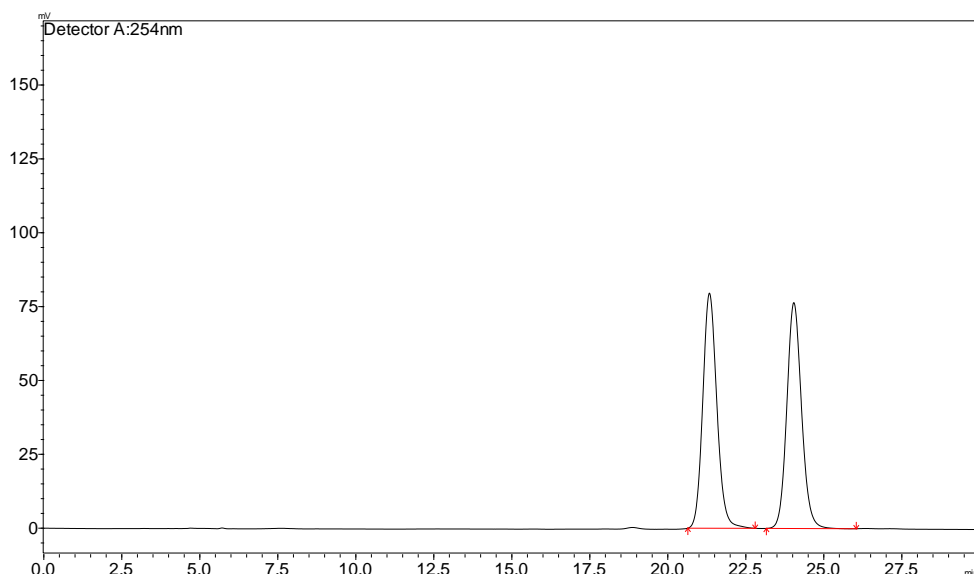

| Peak# | Ret. Time | Area    | Height | Area %  | Height % |
|-------|-----------|---------|--------|---------|----------|
| 1     | 21.330    | 2500738 | 79591  | 49.908  | 51.000   |
| 2     | 24.035    | 2510007 | 76471  | 50.092  | 49.000   |
| Total |           | 5010745 | 156061 | 100.000 | 100.000  |

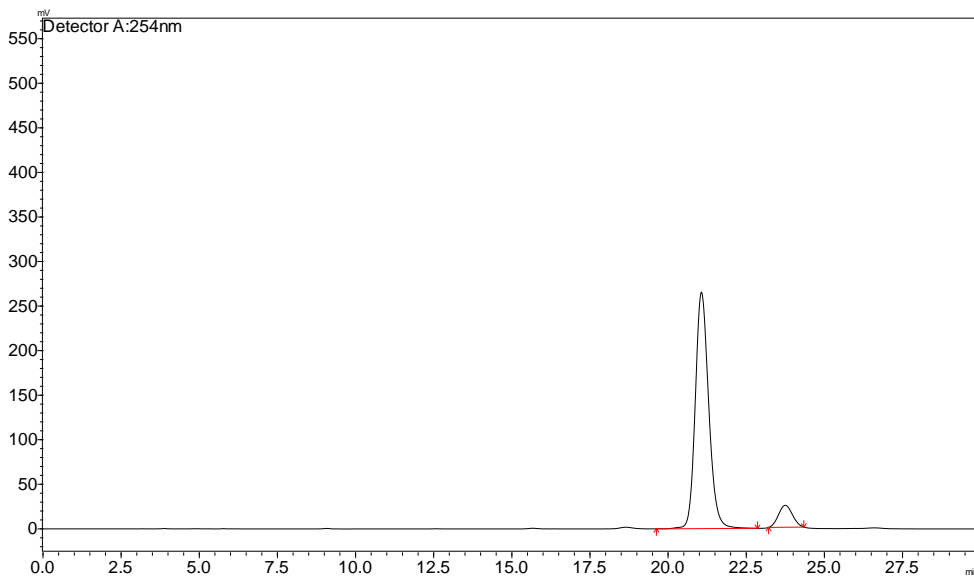

| Peak# | Ret. Time | Area    | Height | Area % | Height % |
|-------|-----------|---------|--------|--------|----------|
| 1     | 21.062    | 7934544 | 265384 | 91.207 | 91.498   |

|       |        |         |        |         |         |
|-------|--------|---------|--------|---------|---------|
| 2     | 23.744 | 764926  | 24659  | 8.793   | 8.502   |
| Total |        | 8699470 | 290043 | 100.000 | 100.000 |

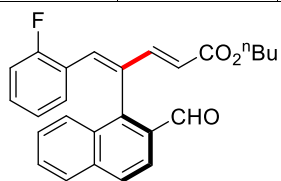

**3h**  
77%, 99% ee

Daicel Chiralpak IA-H column, n-hexane/*i*-PrOH (99/1), 1.0 mL/min, 254 nm, 15.198 min (major enantiomer), 17.346 min (minor enantiomer).

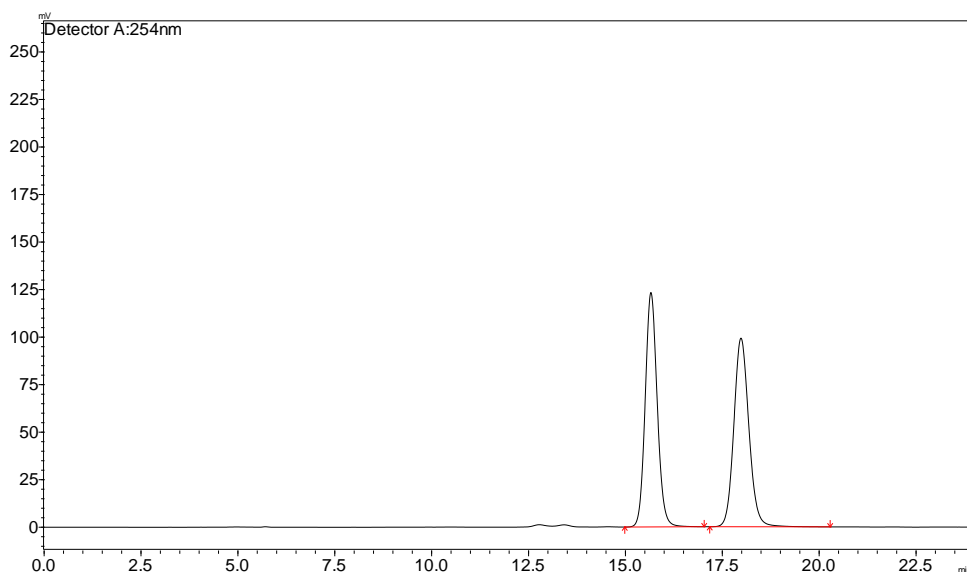

| Peak# | Ret. Time | Area    | Height | Area %  | Height % |
|-------|-----------|---------|--------|---------|----------|
| 1     | 15.654    | 2658802 | 123325 | 49.862  | 55.414   |
| 2     | 17.978    | 2673478 | 99227  | 50.138  | 44.586   |
| Total |           | 5332281 | 222552 | 100.000 | 100.000  |

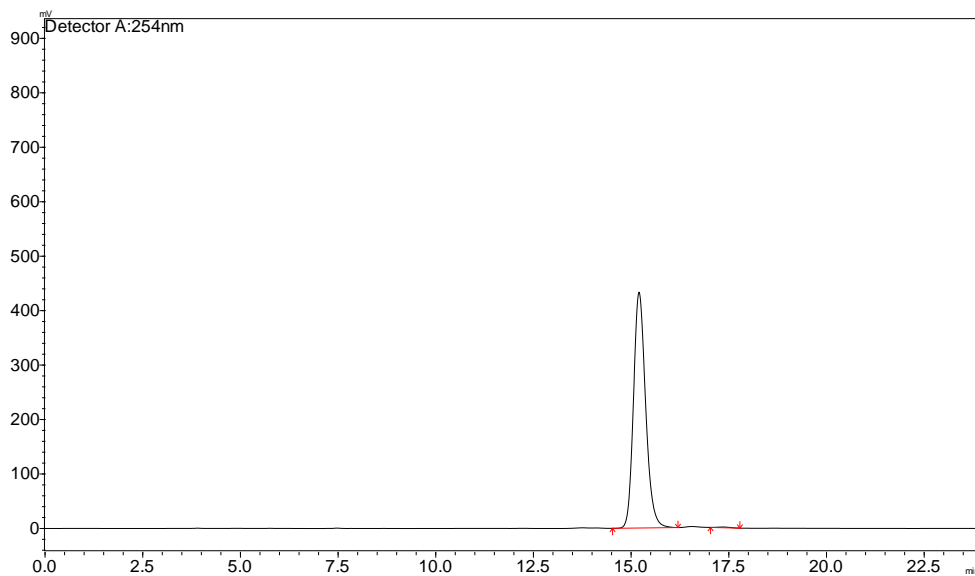

| Peak# | Ret. Time | Area    | Height | Area % | Height % |
|-------|-----------|---------|--------|--------|----------|
| 1     | 15.198    | 9373485 | 433244 | 99.715 | 99.718   |

|       |        |         |        |         |         |
|-------|--------|---------|--------|---------|---------|
| 2     | 17.346 | 26838   | 1225   | 0.285   | 0.282   |
| Total |        | 9400322 | 434469 | 100.000 | 100.000 |

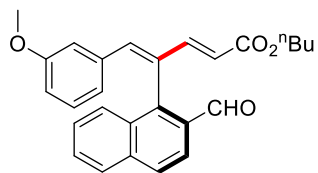

**3i**  
90%, 87% ee

Daicel Chiralpak IC-H column, n-hexane/i-PrOH (90/10), 1.0 mL/min, 254 nm,  
19.065 min (major enantiomer), 27.883 min (minor enantiomer).

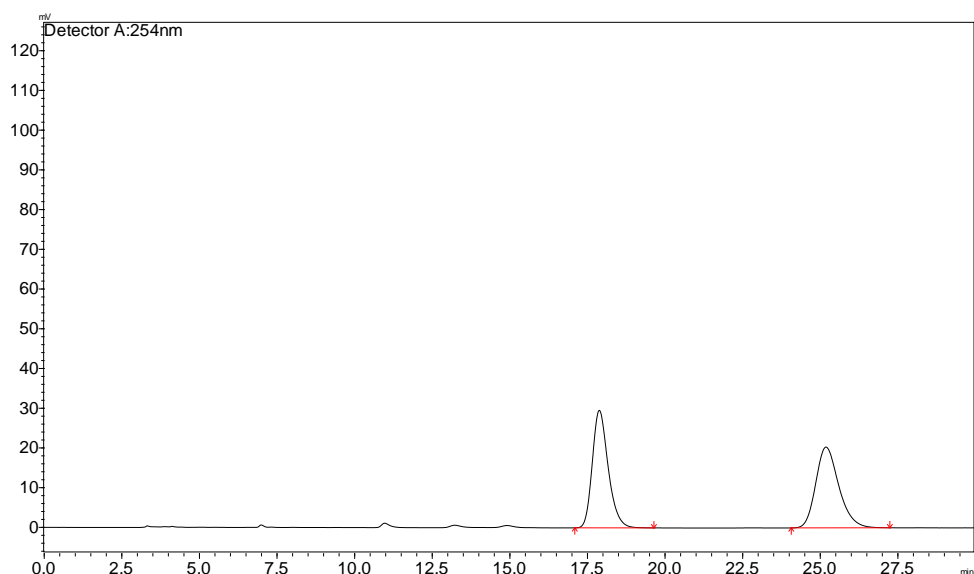

| Peak# | Ret. Time | Area    | Height | Area %  | Height % |
|-------|-----------|---------|--------|---------|----------|
| 1     | 17.878    | 1053989 | 29578  | 50.098  | 59.257   |
| 2     | 25.181    | 1049886 | 20337  | 49.902  | 40.743   |
| Total |           | 2103875 | 49914  | 100.000 | 100.000  |

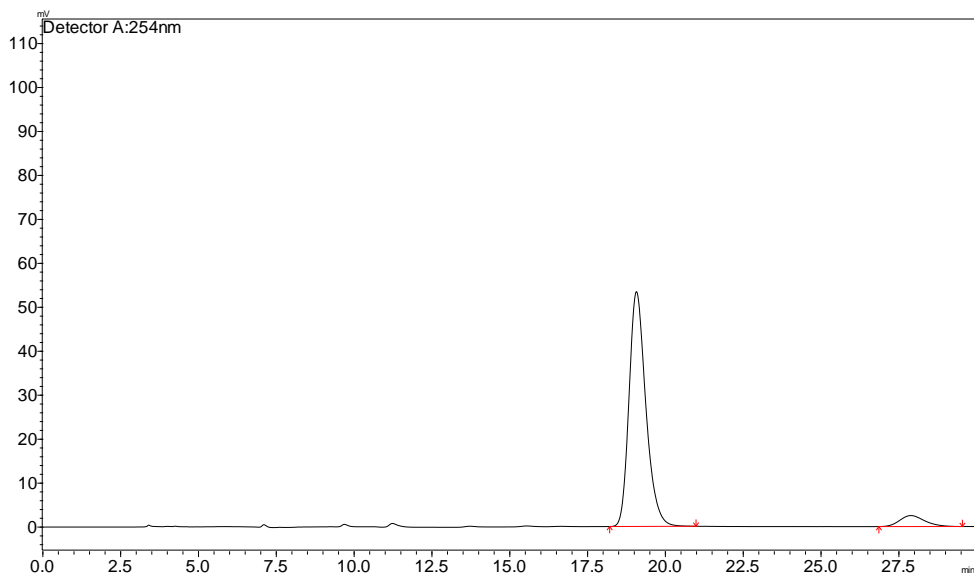

| Peak# | Ret. Time | Area    | Height | Area % | Height % |
|-------|-----------|---------|--------|--------|----------|
| 1     | 19.065    | 2005137 | 53420  | 93.475 | 95.531   |

|       |        |         |       |         |         |
|-------|--------|---------|-------|---------|---------|
| 2     | 27.883 | 139968  | 2499  | 6.525   | 4.469   |
| Total |        | 2145105 | 55919 | 100.000 | 100.000 |

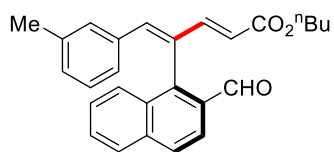

**3j**  
80%, 89% ee

Daicel Chiralpak IA-H column, n-hexane/i-PrOH (98/2), 1.0 mL/min, 254 nm, 12.303 min (major enantiomer), 14.067 min (minor enantiomer).

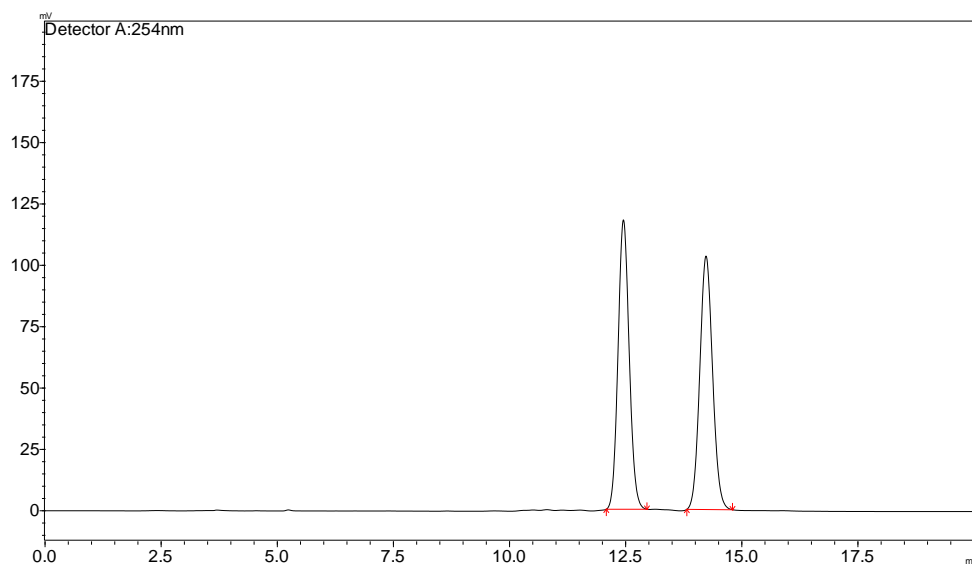

| Peak# | Ret. Time | Area    | Height | Area %  | Height % |
|-------|-----------|---------|--------|---------|----------|
| 1     | 12.448    | 1971262 | 117916 | 49.901  | 53.309   |
| 2     | 14.226    | 1979079 | 103279 | 50.099  | 46.691   |
| Total |           | 3950341 | 221195 | 100.000 | 100.000  |

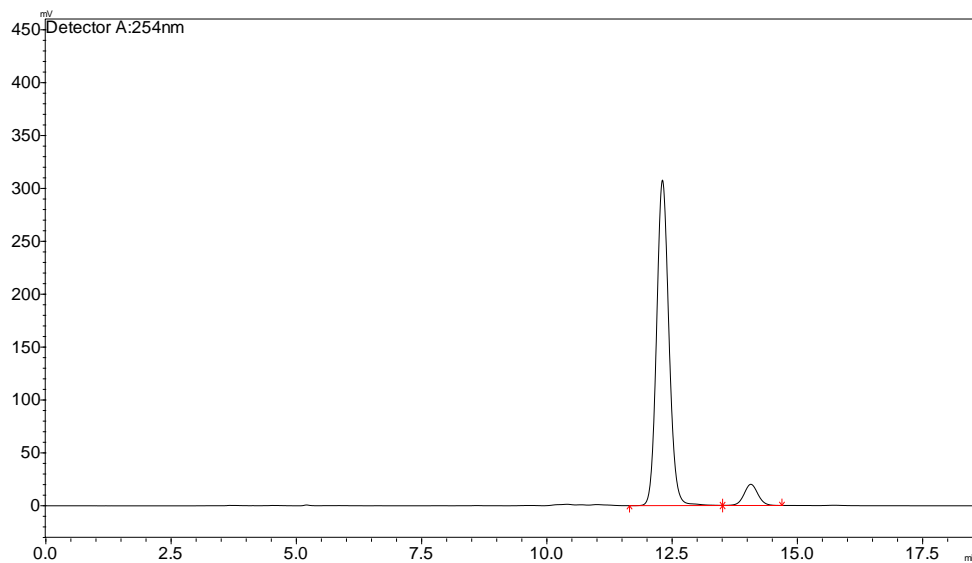

| Peak# | Ret. Time | Area    | Height | Area % | Height % |
|-------|-----------|---------|--------|--------|----------|
| 1     | 12.303    | 5272406 | 307790 | 93.133 | 93.886   |

|       |        |         |        |         |         |
|-------|--------|---------|--------|---------|---------|
| 2     | 14.067 | 388769  | 20044  | 6.867   | 6.114   |
| Total |        | 5661175 | 327834 | 100.000 | 100.000 |

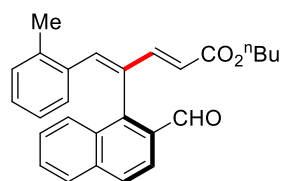

**3k**  
83%, 97% ee

Daicel Chiralpak IC-H column, n-hexane/i-PrOH (92/8), 1.0 mL/min, 254 nm,  
14.602 min (major enantiomer), 16.477 min (minor enantiomer).

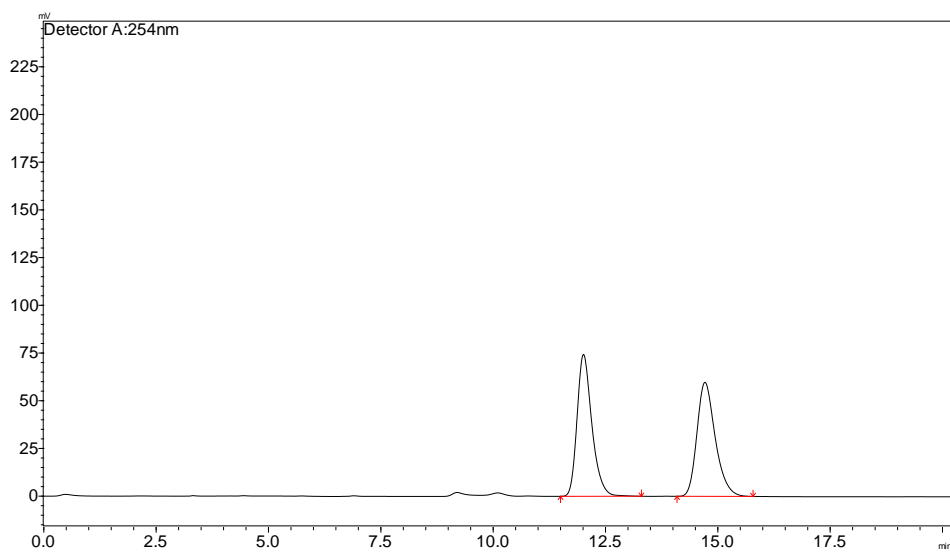

| Peak# | Ret. Time | Area    | Height | Area %  | Height % |
|-------|-----------|---------|--------|---------|----------|
| 1     | 12.006    | 1707606 | 74360  | 50.202  | 55.446   |
| 2     | 14.709    | 1693851 | 59751  | 49.798  | 44.554   |
| Total |           | 3401456 | 134111 | 100.000 | 100.000  |

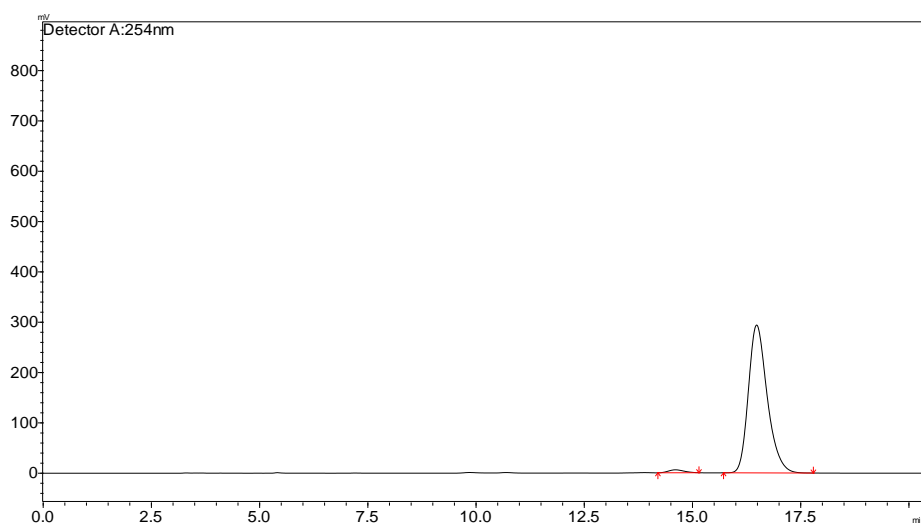

| Peak# | Ret. Time | Area   | Height | Area % | Height % |
|-------|-----------|--------|--------|--------|----------|
| 1     | 14.602    | 148687 | 5906   | 1.642  | 1.971    |



|       |        |         |        |         |         |
|-------|--------|---------|--------|---------|---------|
| 2     | 16.477 | 8906591 | 293804 | 98.358  | 98.029  |
| Total |        | 9055278 | 299711 | 100.000 | 100.000 |

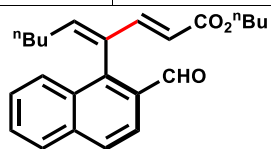

3I  
65%, 85% ee

Daicel Chiralpak OD-H column, n-hexane/i-PrOH (98/2), 1.0 mL/min, 254 nm, 6.518 min (major enantiomer), 7.693 min (minor enantiomer).

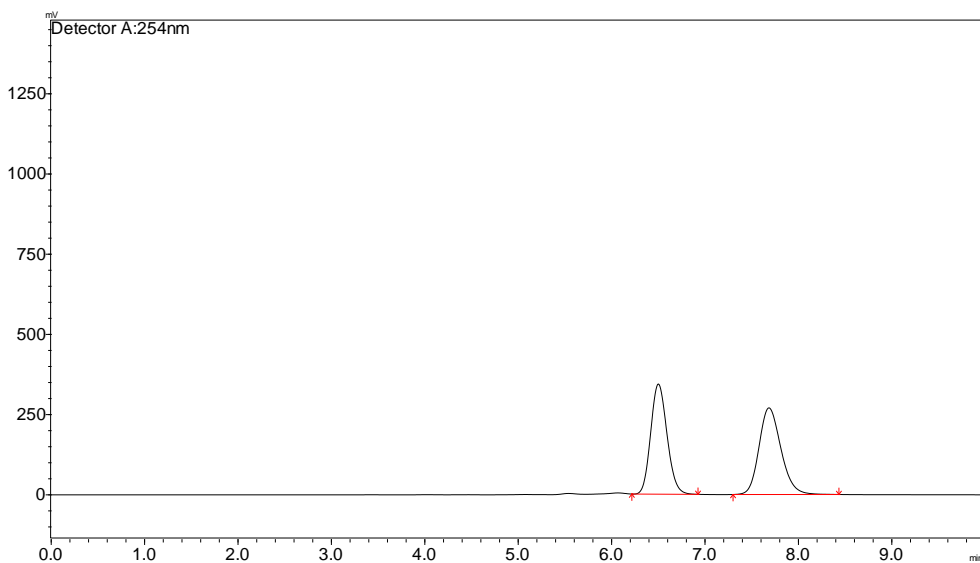

| Peak# | Ret. Time | Area    | Height | Area %  | Height % |
|-------|-----------|---------|--------|---------|----------|
| 1     | 6.496     | 4177985 | 343499 | 48.699  | 55.984   |
| 2     | 7.680     | 4401245 | 270063 | 51.301  | 44.016   |
| Total |           | 8579230 | 613561 | 100.000 | 100.000  |

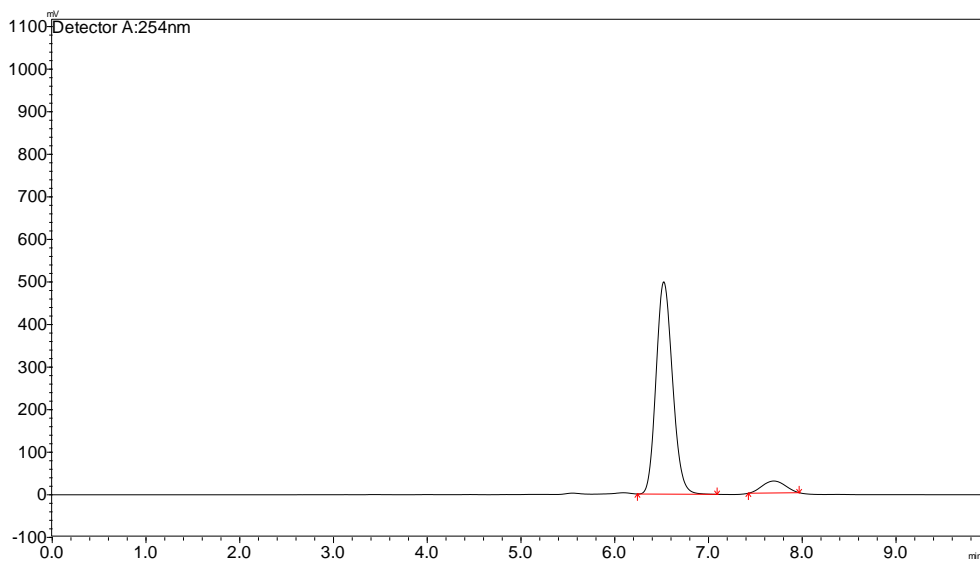

| Peak# | Ret. Time | Area    | Height | Area % | Height % |
|-------|-----------|---------|--------|--------|----------|
| 1     | 6.518     | 6080216 | 498913 | 92.699 | 94.685   |
| 2     | 7.693     | 478875  | 28006  | 7.301  | 5.315    |

|       |  |         |        |         |         |
|-------|--|---------|--------|---------|---------|
| Total |  | 6559091 | 526920 | 100.000 | 100.000 |
|-------|--|---------|--------|---------|---------|

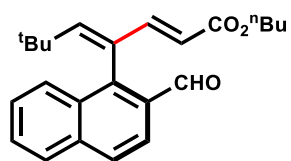

3m  
42%,33% ee

Daicel Chiralpak OD-H column, n-hexane/*i*-PrOH (98/2), 1.0 mL/min, 254 nm, 5.636 min (major enantiomer), 6.204 min (minor enantiomer).

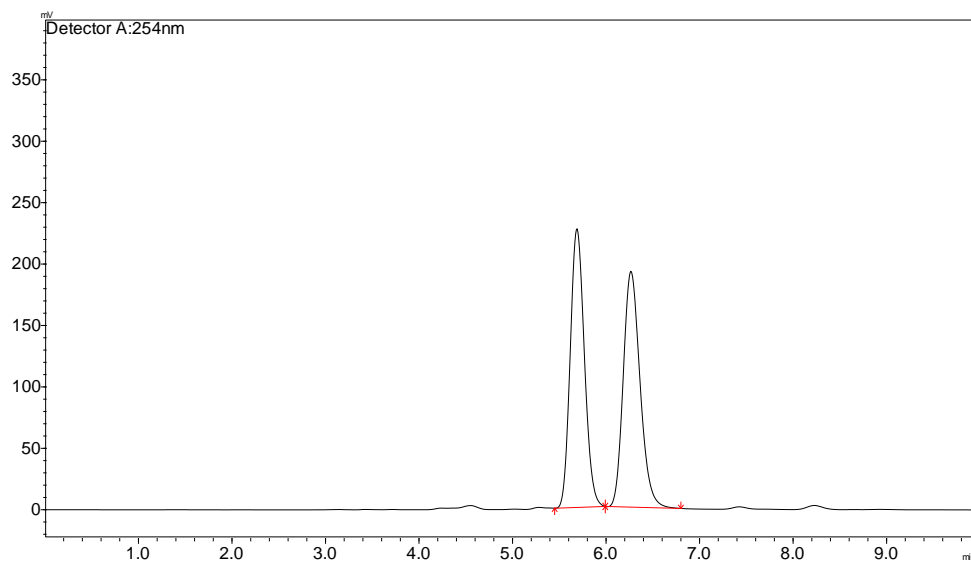

| Peak# | Ret. Time | Area    | Height | Area %  | Height % |
|-------|-----------|---------|--------|---------|----------|
| 1     | 5.684     | 2389287 | 226813 | 49.952  | 54.154   |
| 2     | 6.262     | 2393845 | 192020 | 50.048  | 45.846   |
| Total |           | 4783132 | 418833 | 100.000 | 100.000  |

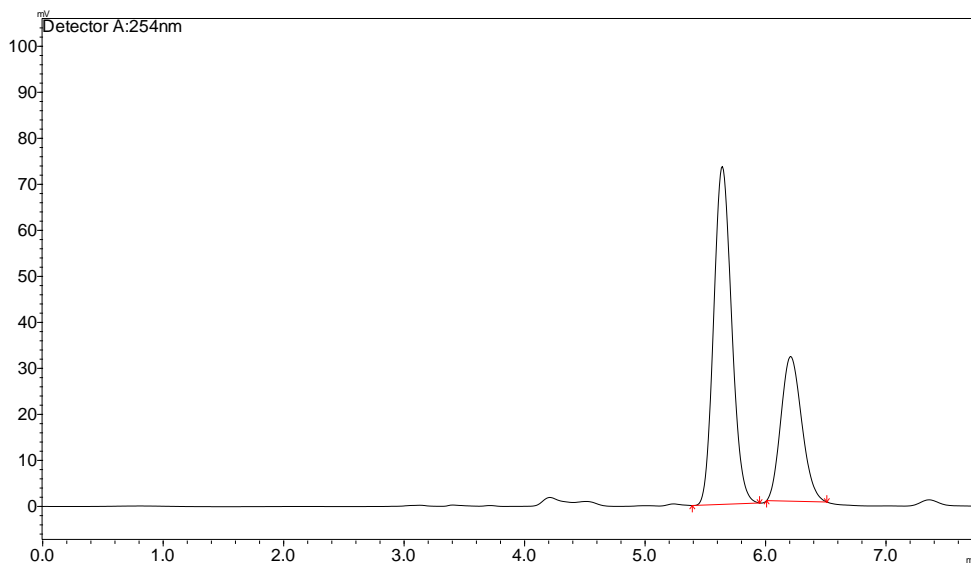

| Peak# | Ret. Time | Area   | Height | Area % | Height % |
|-------|-----------|--------|--------|--------|----------|
| 1     | 5.636     | 762232 | 73467  | 66.750 | 70.021   |
| 2     | 6.204     | 379688 | 31455  | 33.250 | 29.979   |

|       |  |         |        |         |         |
|-------|--|---------|--------|---------|---------|
| Total |  | 1141920 | 104921 | 100.000 | 100.000 |
|-------|--|---------|--------|---------|---------|

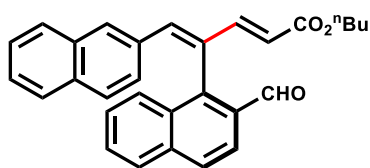

3n  
81%,85% ee

Daicel Chiralpak IC-H column, n-hexane/i-PrOH (90/10), 1.0 mL/min, 254 nm,  
19.763 min (major enantiomer), 23.790 min (minor enantiomer).

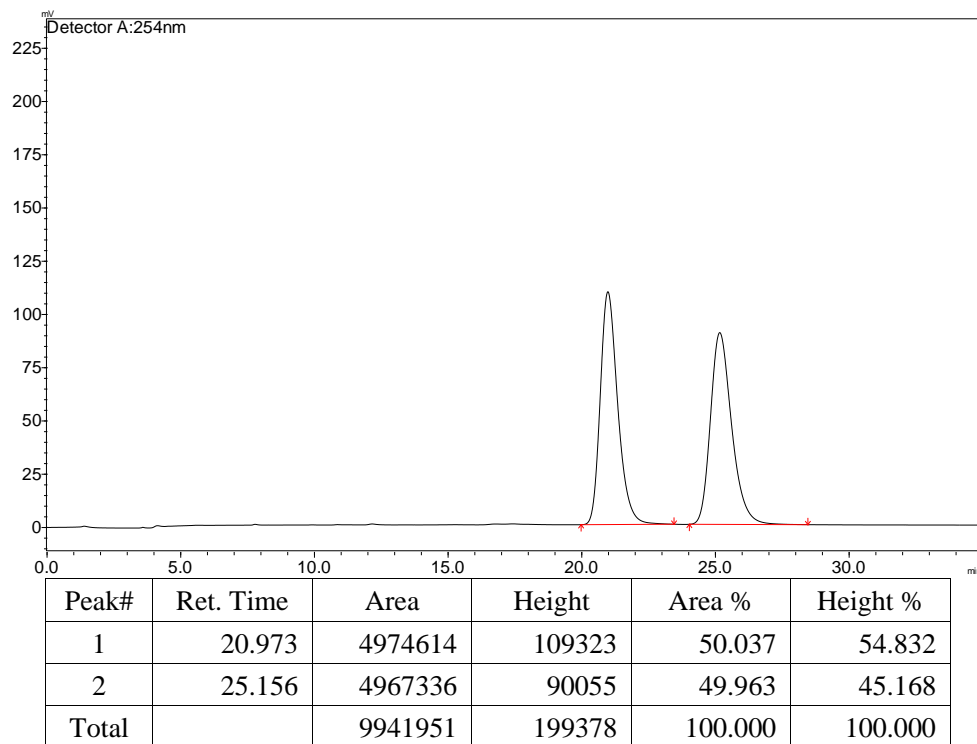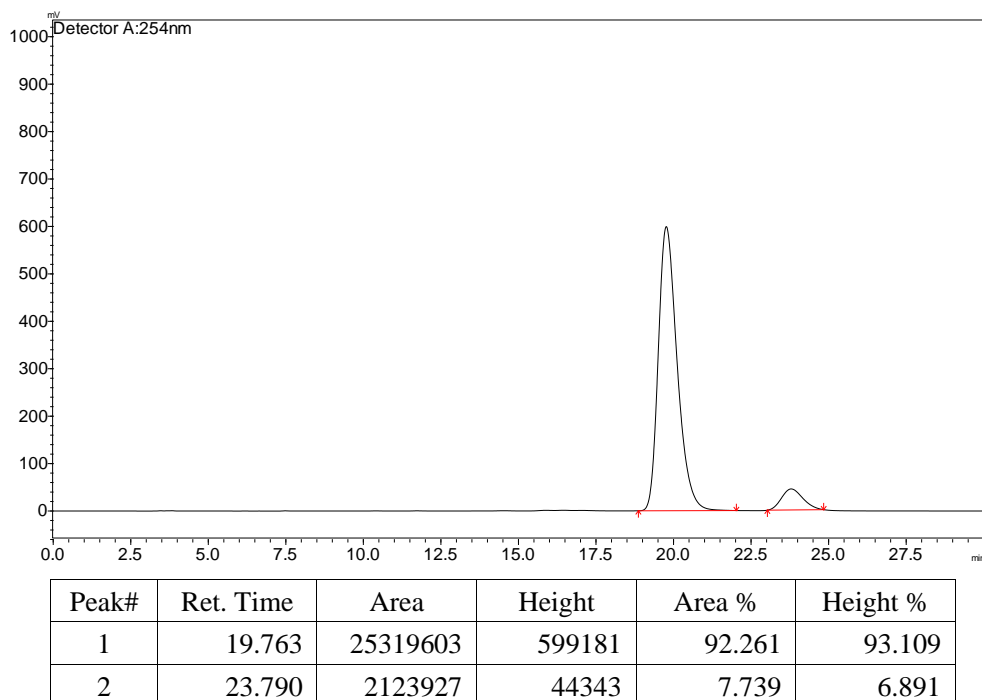

|       |  |          |        |         |         |
|-------|--|----------|--------|---------|---------|
| Total |  | 27443529 | 643524 | 100.000 | 100.000 |
|-------|--|----------|--------|---------|---------|

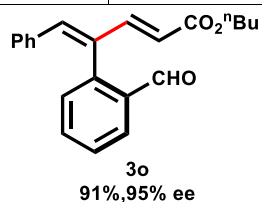

Daicel Chiralpak OD-H column, n-hexane/i-PrOH (99/1), 1.0 mL/min, 254 nm, 14.244 min (major enantiomer), 16.127 min (minor enantiomer).

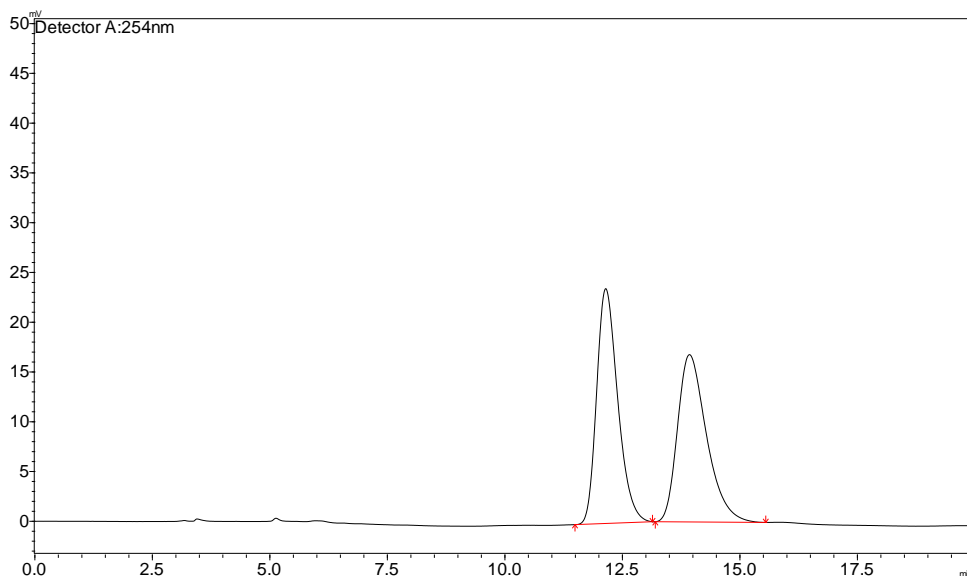

| Peak# | Ret. Time | Area    | Height | Area %  | Height % |
|-------|-----------|---------|--------|---------|----------|
| 1     | 12.141    | 736985  | 23594  | 50.495  | 58.393   |
| 2     | 13.924    | 722530  | 16811  | 49.505  | 41.607   |
| Total |           | 1459515 | 40406  | 100.000 | 100.000  |

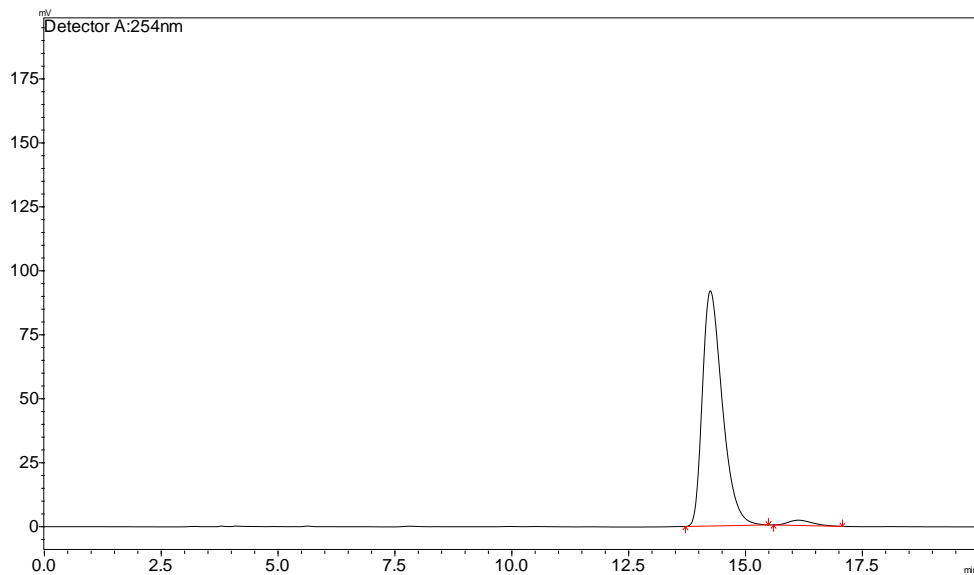

| Peak# | Ret. Time | Area    | Height | Area %  | Height % |
|-------|-----------|---------|--------|---------|----------|
| 1     | 14.244    | 2730672 | 91917  | 97.355  | 97.804   |
| 2     | 16.127    | 74196   | 2063   | 2.645   | 2.196    |
| Total |           | 2804868 | 93981  | 100.000 | 100.000  |

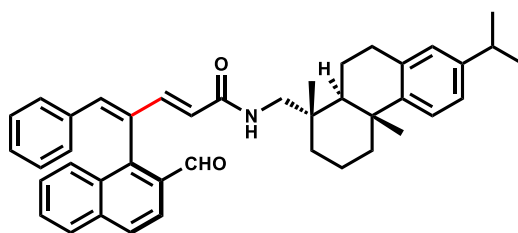

3p  
80%, 86% ee

Daicel Chiralpak IC-H column, n-hexane/*i*-PrOH (90/10), 1.0 mL/min, 254 nm,  
28.443 min (major enantiomer), 48.025 min (minor enantiomer).

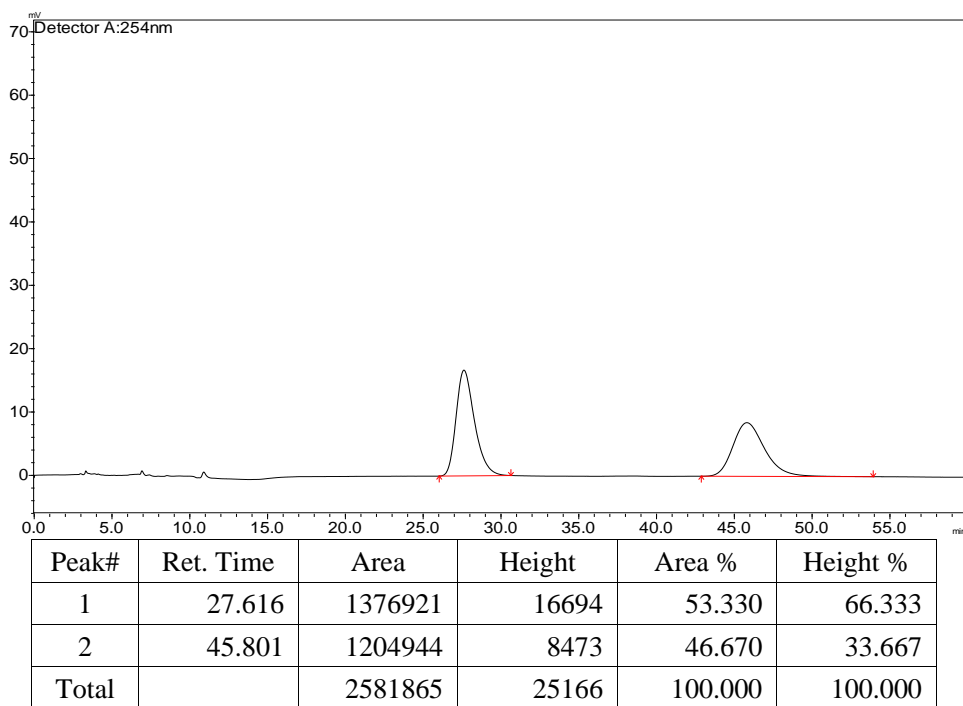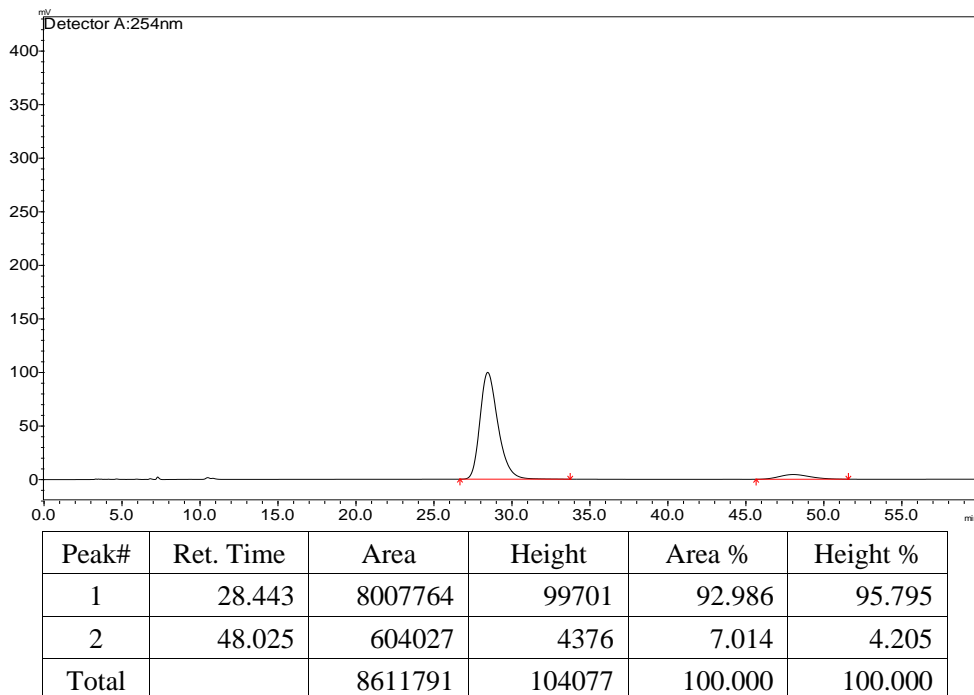

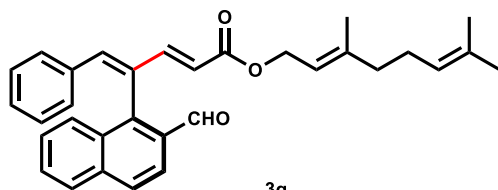

3q  
84%, 88% ee

Daicel Chiralpak IA-H column, n-hexane/i-PrOH (98/2), 1.0 mL/min, 254 nm, 12.494 min (major enantiomer), 13.771 min (minor enantiomer).

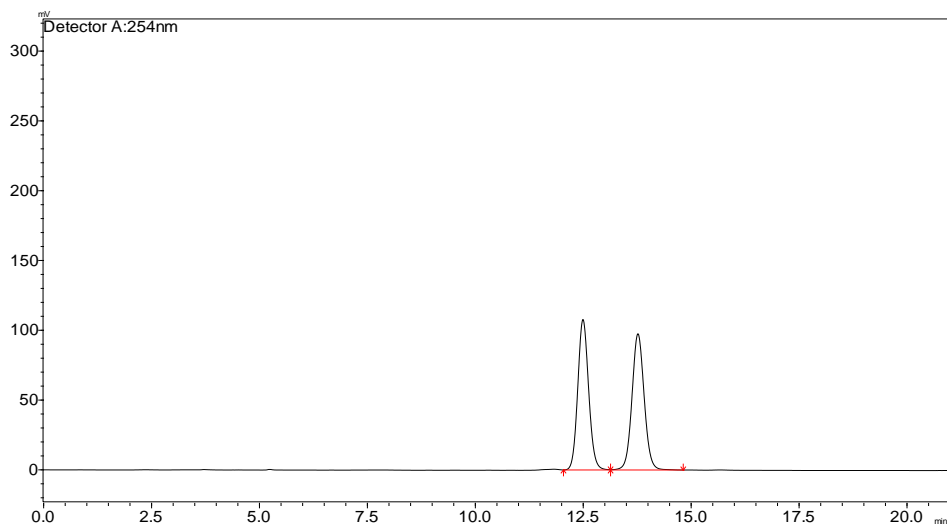

| Peak# | Ret. Time | Area    | Height | Area %  | Height % |
|-------|-----------|---------|--------|---------|----------|
| 1     | 12.489    | 1889756 | 107813 | 49.579  | 52.475   |
| 2     | 13.763    | 1921865 | 97642  | 50.421  | 47.525   |
| Total |           | 3811621 | 205455 | 100.000 | 100.000  |

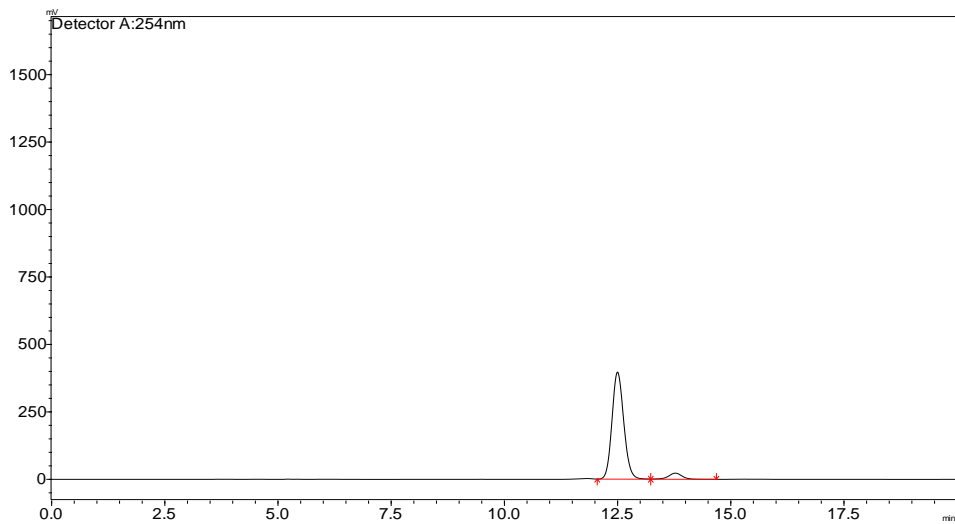

| Peak# | Ret. Time | Area    | Height | Area %  | Height % |
|-------|-----------|---------|--------|---------|----------|
| 1     | 12.494    | 7173083 | 396778 | 93.853  | 94.606   |
| 2     | 13.771    | 469788  | 22621  | 6.147   | 5.394    |
| Total |           | 7642871 | 419399 | 100.000 | 100.000  |

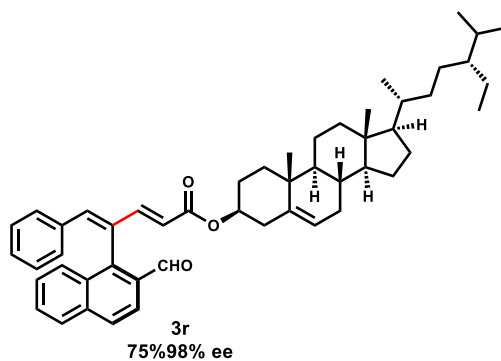

Daicel Chiralpak IC-H column, n-hexane/i-PrOH (95/5), 1.0 mL/min, 254 nm,  
14.550 min (major enantiomer), 16.680 min (minor enantiomer).

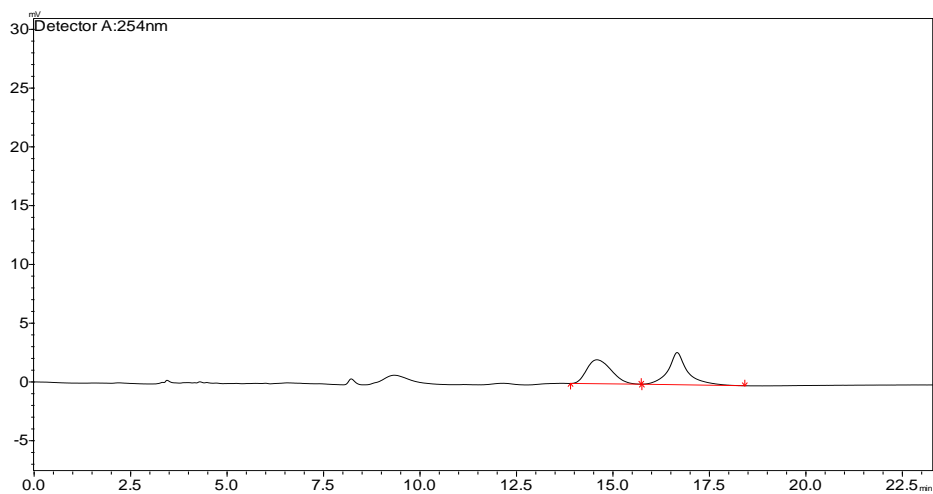

| Peak# | Ret. Time | Area   | Height | Area %  | Height % |
|-------|-----------|--------|--------|---------|----------|
| 1     | 14.581    | 90007  | 2038   | 48.440  | 42.687   |
| 2     | 16.658    | 95806  | 2736   | 51.560  | 57.313   |
| Total |           | 185813 | 4774   | 100.000 | 100.000  |

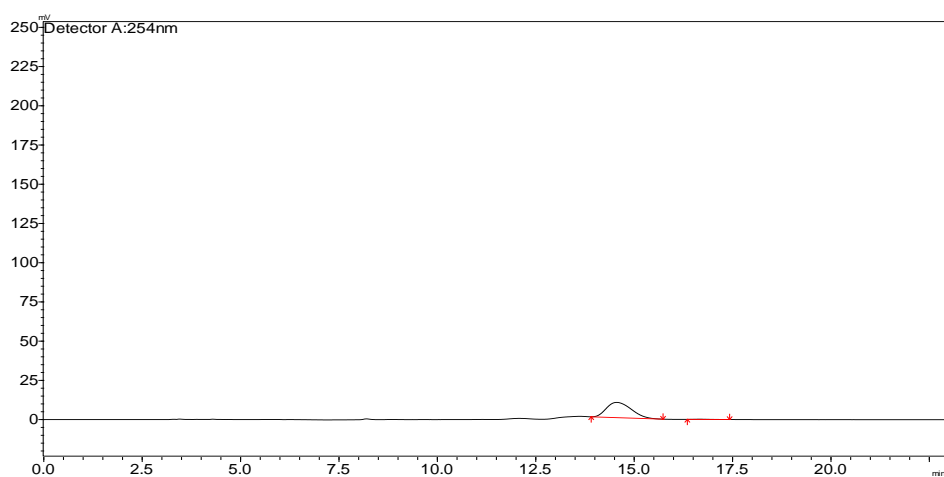

| Peak# | Ret. Time | Area   | Height | Area %  | Height % |
|-------|-----------|--------|--------|---------|----------|
| 1     | 14.550    | 428975 | 9716   | 99.152  | 98.698   |
| 2     | 16.680    | 3671   | 128    | 0.848   | 1.302    |
| Total |           | 432646 | 9844   | 100.000 | 100.000  |

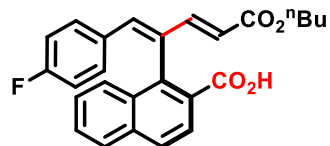

**4a, 93%, 92% ee**

Daicel Chiralpak IA column, n-hexane/i-PrOH (60/40), 1 mL/min, 254 nm, 7.113 min (major enantiomer), 18.107 min (minor enantiomer).

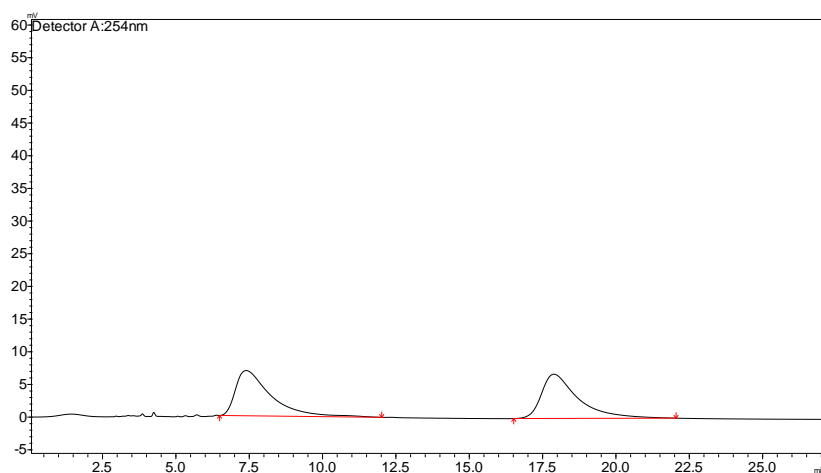

| Peak# | Ret. Time | Area    | Height | Area %  | Height % |
|-------|-----------|---------|--------|---------|----------|
| 1     | 7.390     | 581497  | 6919   | 49.662  | 50.525   |
| 2     | 17.881    | 589420  | 6775   | 50.338  | 49.475   |
| Total |           | 1170916 | 13694  | 100.000 | 100.000  |

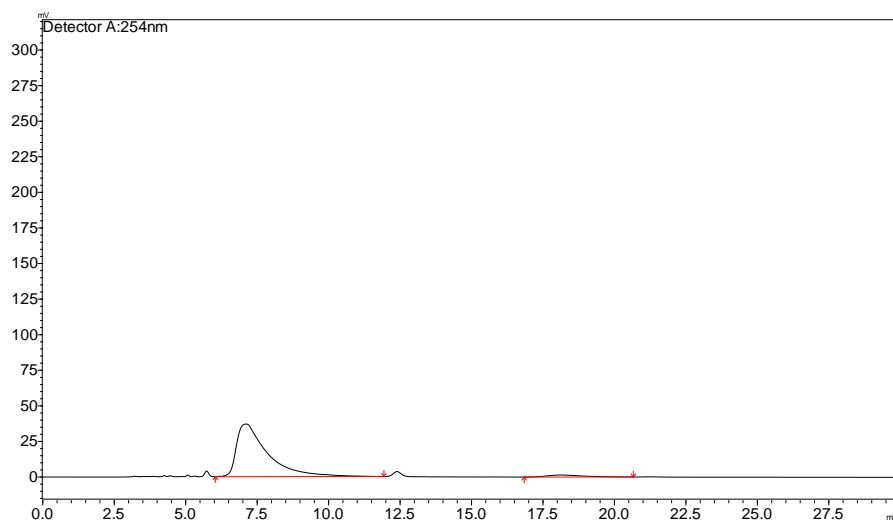

| Peak# | Ret. Time | Area    | Height | Area %  | Height % |
|-------|-----------|---------|--------|---------|----------|
| 1     | 7.113     | 2801293 | 36978  | 95.838  | 96.328   |
| 2     | 18.107    | 121651  | 1409   | 4.162   | 3.672    |
| Total |           | 2922943 | 38387  | 100.000 | 100.000  |



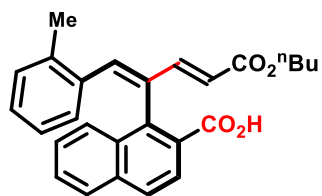

**4b, 90%, 96% ee**

Daicel Chiralpak AD-H column, n-hexane/i-PrOH (60/40), 1 mL/min, 254 nm, 4.179 min (major enantiomer), 5.716 min (minor enantiomer).

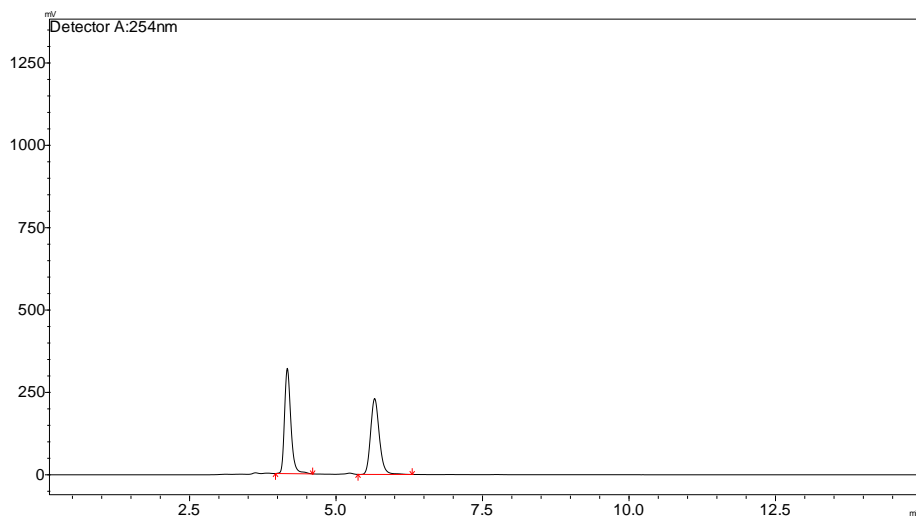

| Peak# | Ret. Time | Area    | Height | Area %  | Height % |
|-------|-----------|---------|--------|---------|----------|
| 1     | 4.164     | 2407075 | 319860 | 50.259  | 58.136   |
| 2     | 5.654     | 2382292 | 230336 | 49.741  | 41.864   |
| Total |           | 4789368 | 550196 | 100.000 | 100.000  |

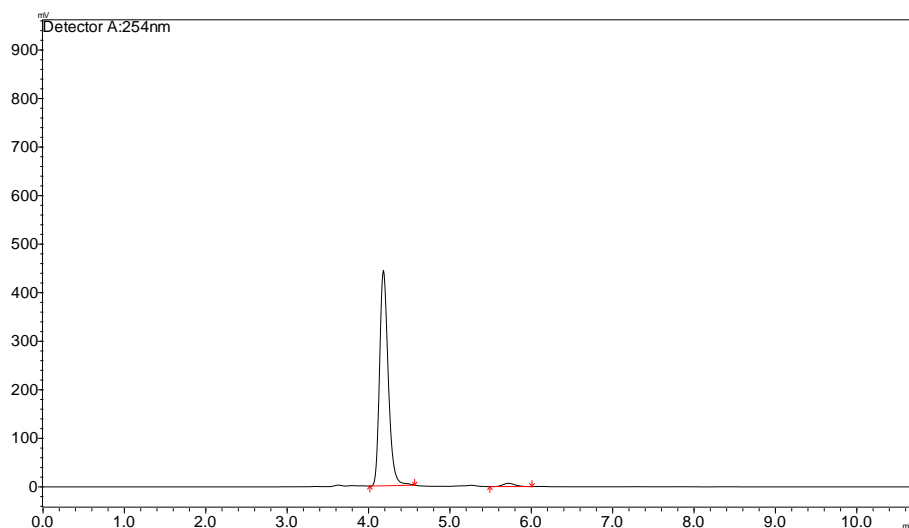

| Peak# | Ret. Time | Area    | Height | Area %  | Height % |
|-------|-----------|---------|--------|---------|----------|
| 1     | 4.179     | 3275942 | 443886 | 97.911  | 98.518   |
| 2     | 5.716     | 69888   | 6679   | 2.089   | 1.482    |
| Total |           | 3345829 | 450565 | 100.000 | 100.000  |

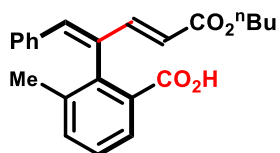

**4c, 88%, 94% ee**

Daicel Chiralpak AD-H column, n-hexane/i-PrOH (60/40), 1 mL/min, 254 nm, 5.280 min (major enantiomer), 11.521 min (minor enantiomer).

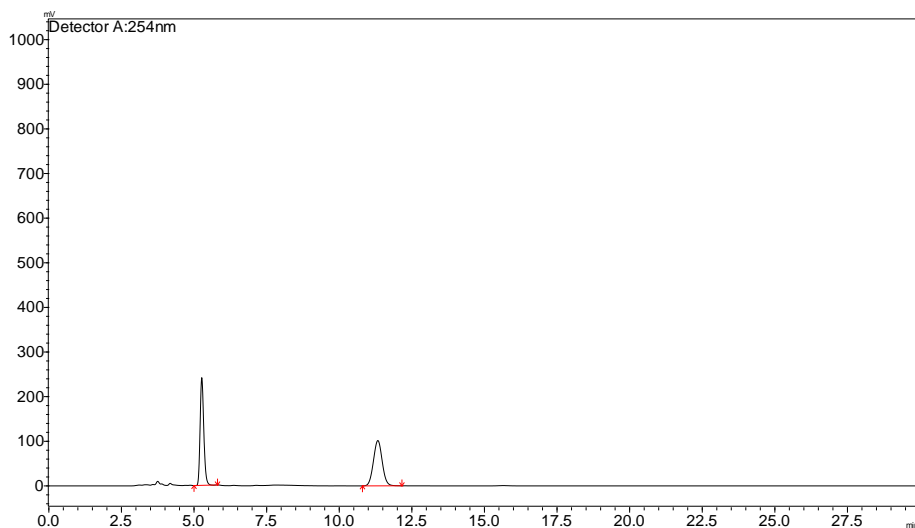

| Peak# | Ret. Time | Area    | Height | Area %  | Height % |
|-------|-----------|---------|--------|---------|----------|
| 1     | 5.263     | 2104871 | 241276 | 49.699  | 70.385   |
| 2     | 11.326    | 2130395 | 101518 | 50.301  | 29.615   |
| Total |           | 4235266 | 342794 | 100.000 | 100.000  |

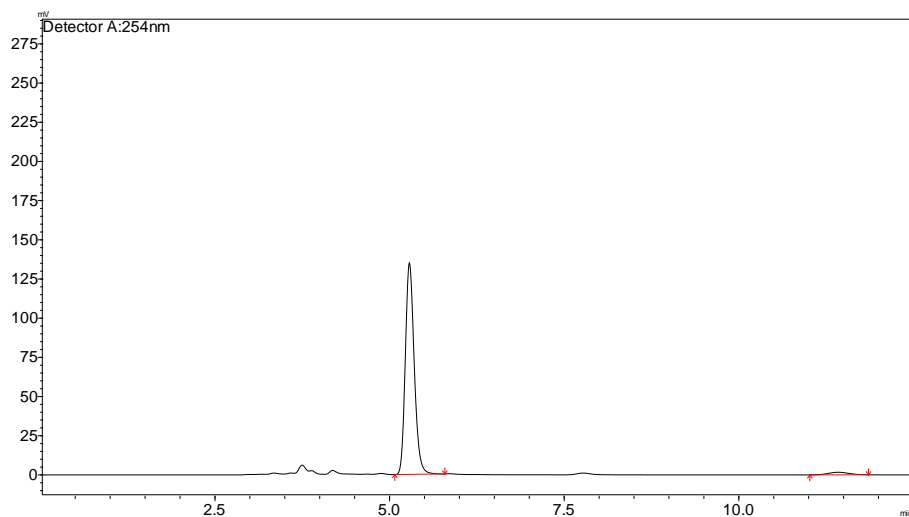

| Peak# | Ret. Time | Area    | Height | Area %  | Height % |
|-------|-----------|---------|--------|---------|----------|
| 1     | 5.280     | 1197303 | 135119 | 97.217  | 98.784   |
| 2     | 11.421    | 34280   | 1664   | 2.783   | 1.216    |
| Total |           | 1231583 | 136782 | 100.000 | 100.000  |

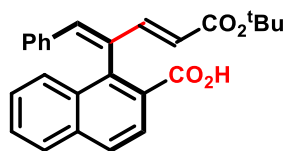

4d, 92%, 88% ee

Daicel Chiralpak AD-H column, n-hexane/i-PrOH (60/40), 1 mL/min, 254 nm, 5.471 min (major enantiomer), 23.709 min (minor enantiomer).

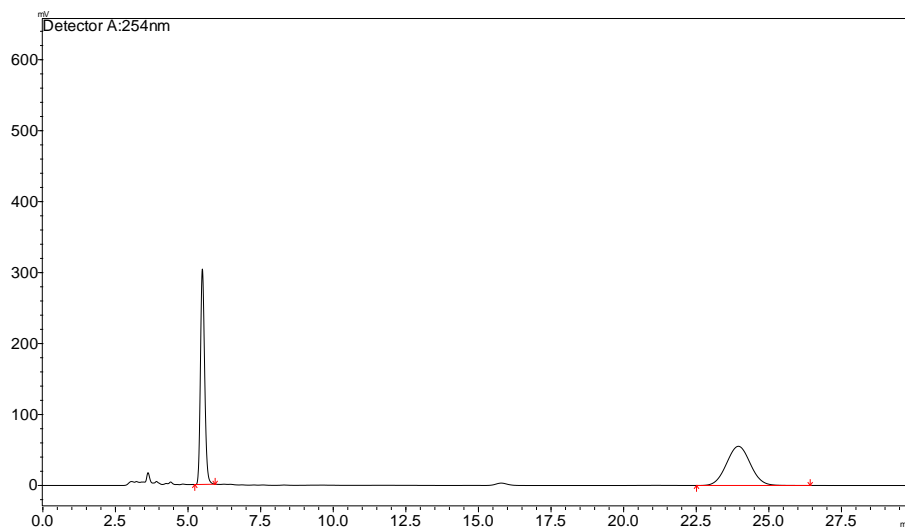

3.

| Peak# | Ret. Time | Area    | Height | Area %  | Height % |
|-------|-----------|---------|--------|---------|----------|
| 1     | 5.489     | 3061516 | 303616 | 49.167  | 84.611   |
| 2     | 23.947    | 3165246 | 55223  | 50.833  | 15.389   |
| Total |           | 6226762 | 358839 | 100.000 | 100.000  |

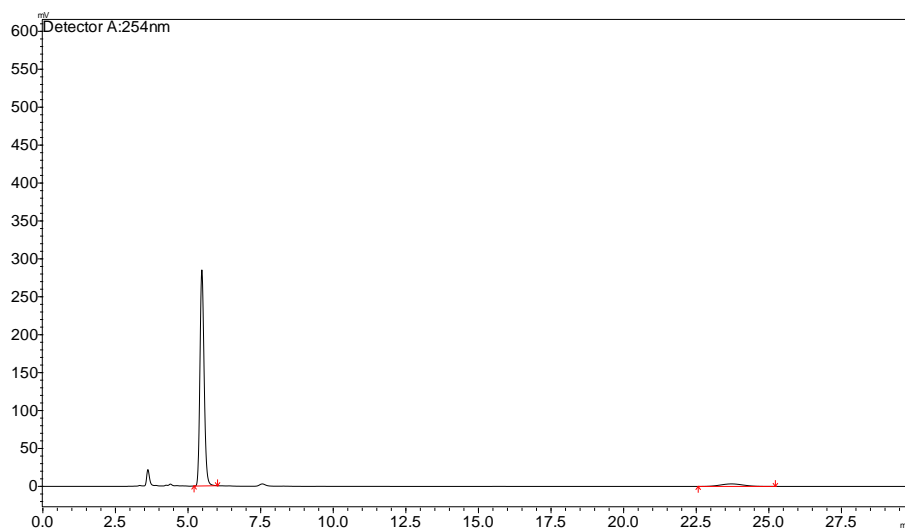

| Peak# | Ret. Time | Area    | Height | Area %  | Height % |
|-------|-----------|---------|--------|---------|----------|
| 1     | 5.471     | 2850763 | 284879 | 94.005  | 98.850   |
| 2     | 23.709    | 181814  | 3315   | 5.995   | 1.150    |
| Total |           | 3032577 | 288195 | 100.000 | 100.000  |

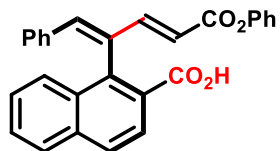

**4e, 86%, 90% ee**

Daicel Chiralpak AD-H column, n-hexane/i-PrOH (60/40), 1 mL/min, 254 nm, 7.911 min (major enantiomer), 9.157 min (minor enantiomer).

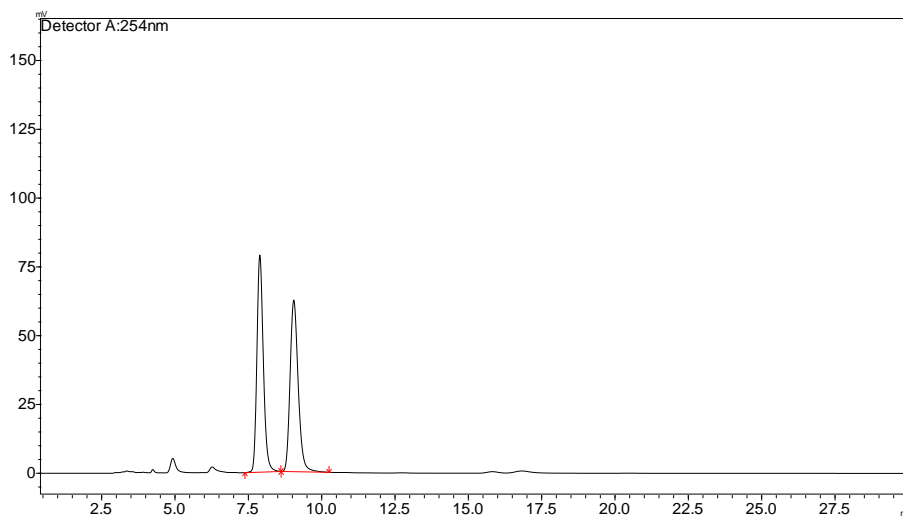

| Peak# | Ret. Time | Area    | Height | Area %  | Height % |
|-------|-----------|---------|--------|---------|----------|
| 1     | 7.887     | 1206066 | 78926  | 50.112  | 55.863   |
| 2     | 9.044     | 1200678 | 62358  | 49.888  | 44.137   |
| Total |           | 2406744 | 141284 | 100.000 | 100.000  |

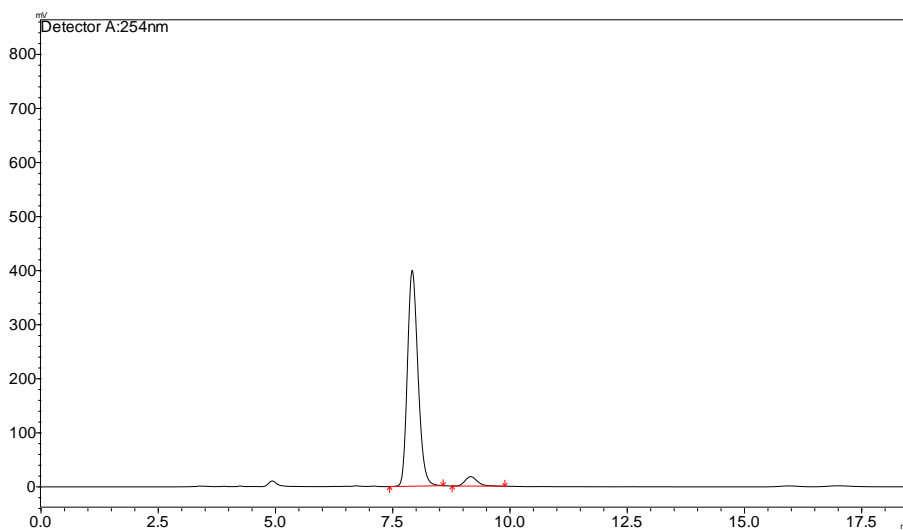

| Peak# | Ret. Time | Area    | Height | Area %  | Height % |
|-------|-----------|---------|--------|---------|----------|
| 1     | 7.911     | 6251934 | 399293 | 95.131  | 95.808   |
| 2     | 9.157     | 319973  | 17471  | 4.869   | 4.192    |
| Total |           | 6571908 | 416765 | 100.000 | 100.000  |

## 9.2 HPLC Analysis of Products 7 with different CCAs

Daicel Chiralpak IA column, n-hexane/i-PrOH (80/20), 1.0 mL/min, 254 nm, 17.130min (major enantiomer), 37.385 min (minor enantiomer).

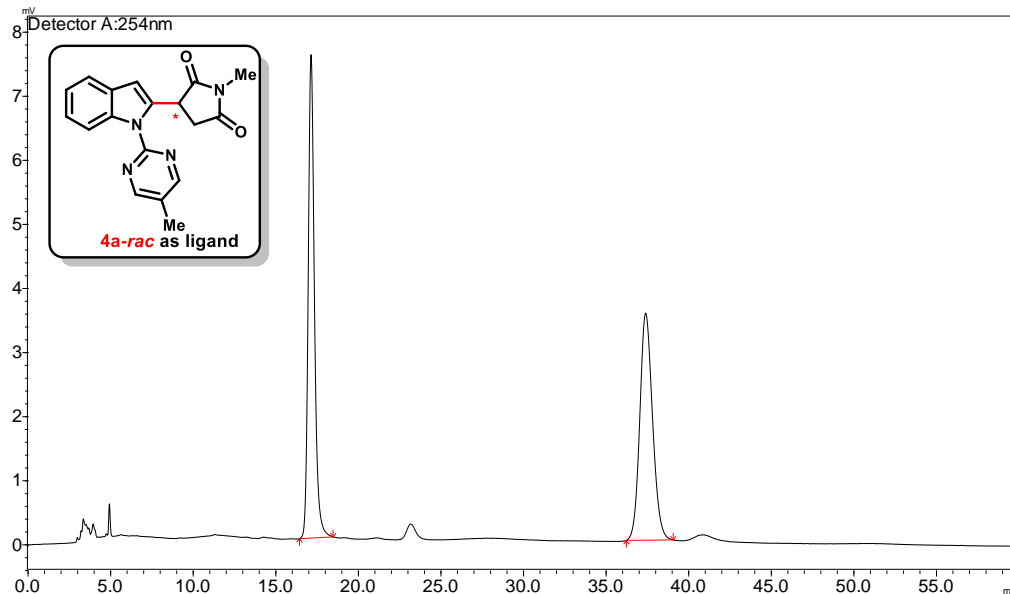

| Peak# | Ret. Time | Area   | Height | Area %  | Height % |
|-------|-----------|--------|--------|---------|----------|
| 1     | 17.130    | 197209 | 7543   | 50.911  | 68.037   |
| 2     | 37.385    | 190152 | 3544   | 49.089  | 31.963   |
| Total |           | 387361 | 11087  | 100.000 | 100.000  |

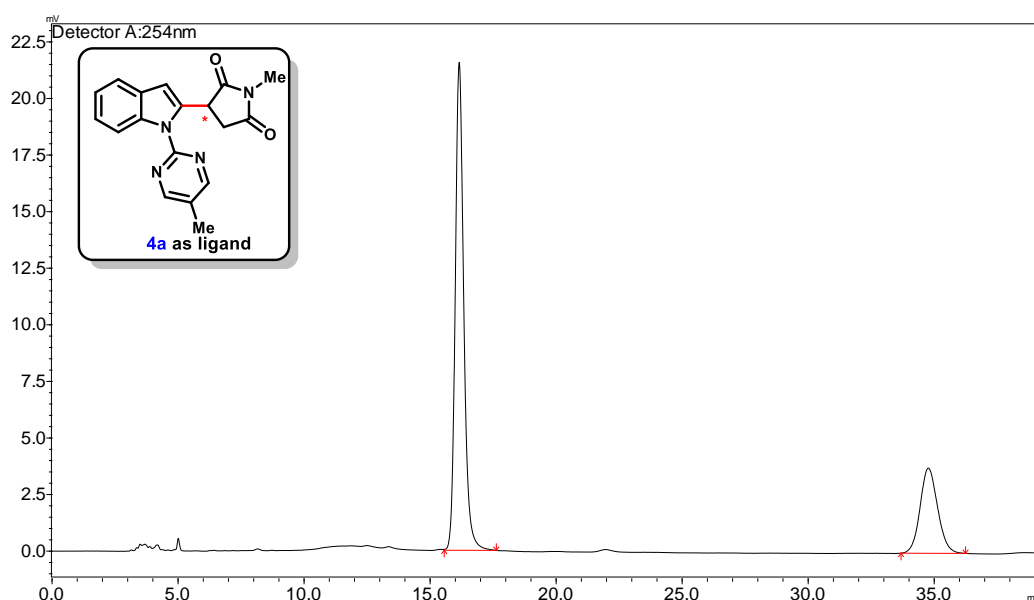

| Peak# | Ret. Time | Area   | Height | Area %  | Height % |
|-------|-----------|--------|--------|---------|----------|
| 1     | 16.149    | 506081 | 21555  | 73.543  | 85.127   |
| 2     | 34.760    | 182066 | 3766   | 26.457  | 14.873   |
| Total |           | 688147 | 25321  | 100.000 | 100.000  |

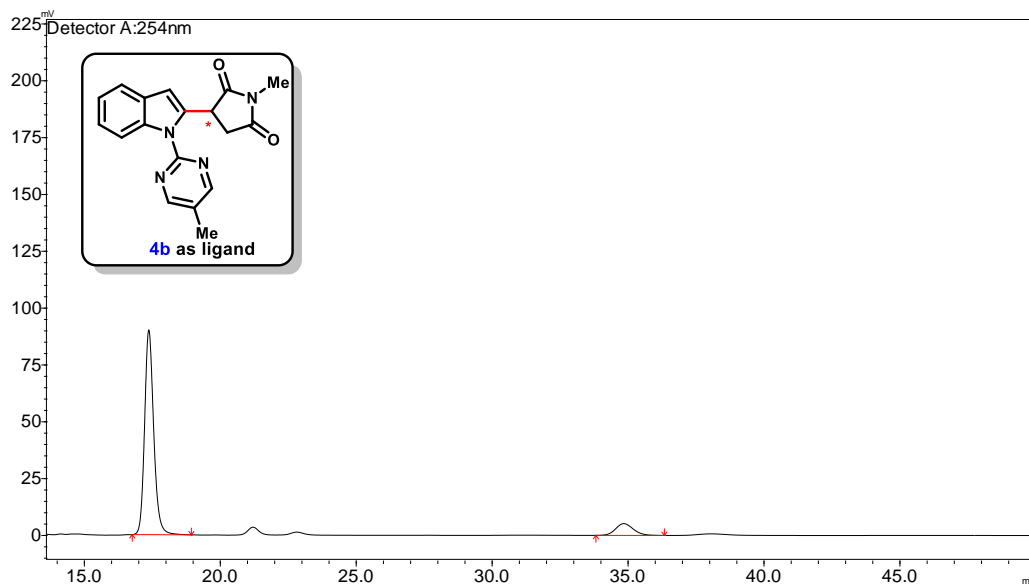

| Peak# | Ret. Time | Area    | Height | Area %  | Height % |
|-------|-----------|---------|--------|---------|----------|
| 1     | 17.365    | 2087108 | 90029  | 89.998  | 94.585   |
| 2     | 34.836    | 231945  | 5154   | 10.002  | 5.415    |
| Total |           | 2319053 | 95183  | 100.000 | 100.000  |

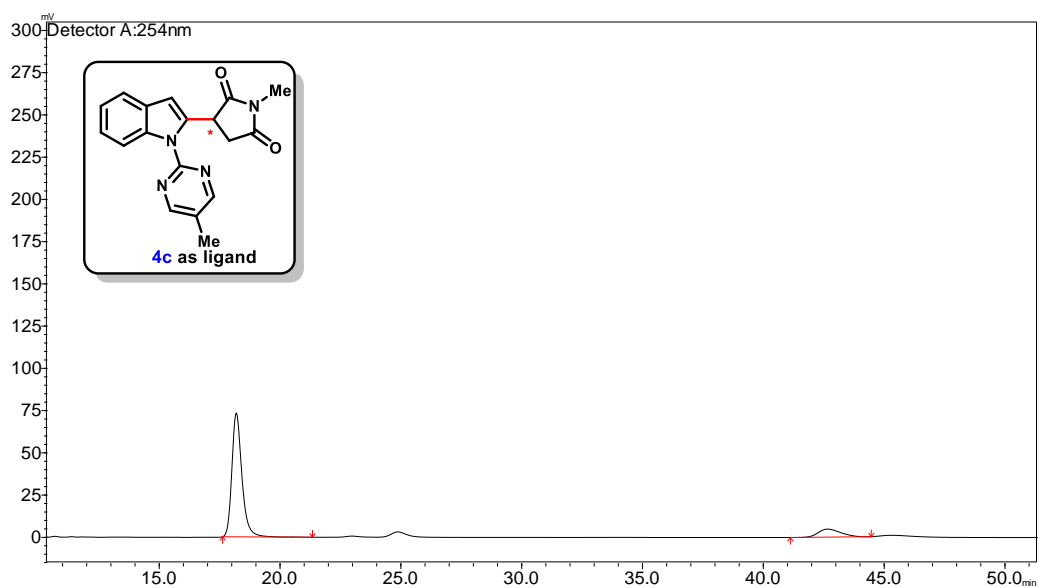

| Peak# | Ret. Time | Area    | Height | Area %  | Height % |
|-------|-----------|---------|--------|---------|----------|
| 1     | 18.184    | 2139674 | 73479  | 87.281  | 93.887   |
| 2     | 42.654    | 311790  | 4784   | 12.719  | 6.113    |
| Total |           | 2451464 | 78263  | 100.000 | 100.000  |

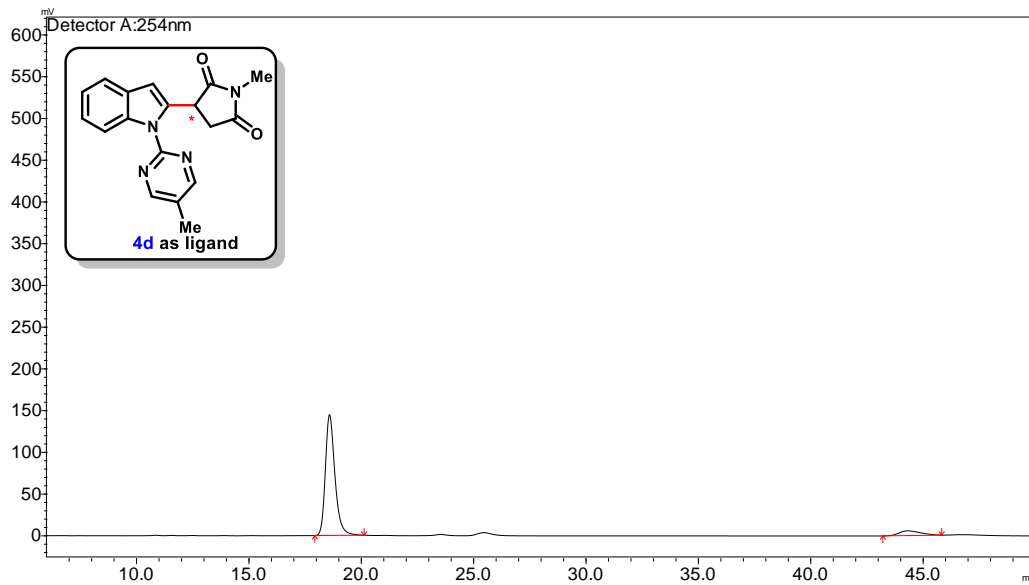

| Peak# | Ret. Time | Area    | Height | Area %  | Height % |
|-------|-----------|---------|--------|---------|----------|
| 1     | 18.581    | 4312134 | 144911 | 92.233  | 96.262   |
| 2     | 44.310    | 363107  | 5627   | 7.767   | 3.738    |
| Total |           | 4675241 | 150538 | 100.000 | 100.000  |

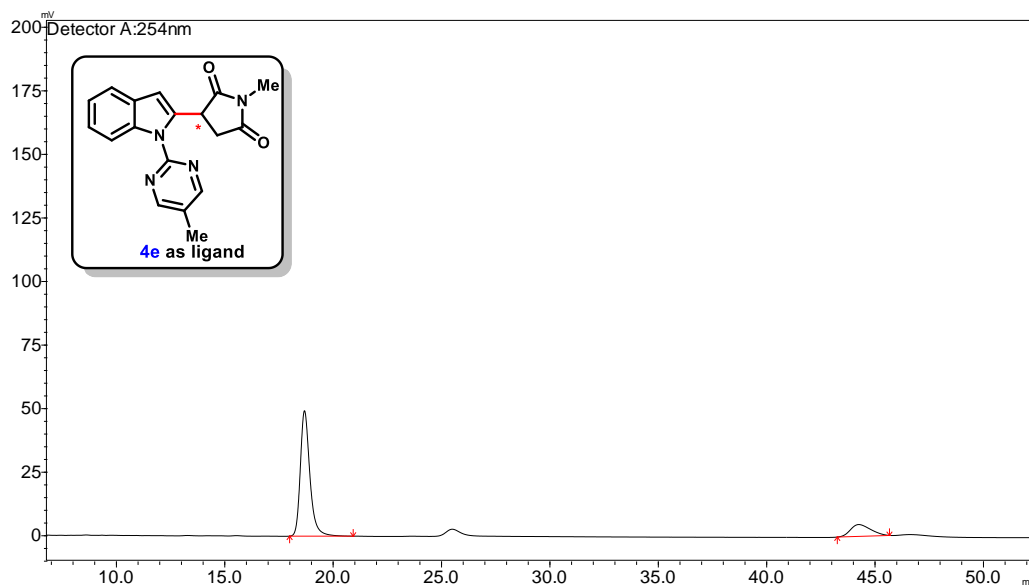

| Peak# | Ret. Time | Area    | Height | Area %  | Height % |
|-------|-----------|---------|--------|---------|----------|
| 1     | 18.673    | 1519938 | 49397  | 82.972  | 91.264   |
| 2     | 44.244    | 311920  | 4728   | 17.028  | 8.736    |
| Total |           | 1831858 | 54126  | 100.000 | 100.000  |

## 10. X-ray Crystallography

Single crystal of compound **3e**:

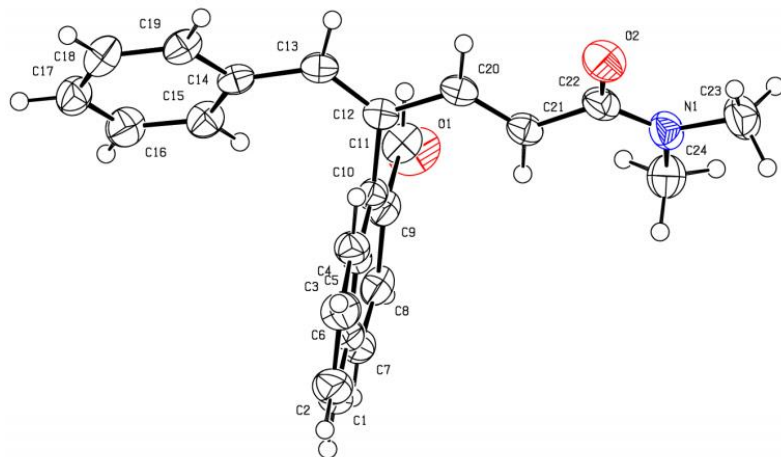

**Table 1** Crystal data and structure refinement for **3e**.

|                                        |                                                                |
|----------------------------------------|----------------------------------------------------------------|
| Empirical formula                      | C <sub>24</sub> H <sub>21</sub> NO <sub>2</sub>                |
| Formula weight                         | 355.42                                                         |
| Temperature/K                          | 170.0                                                          |
| Crystal system                         | orthorhombic                                                   |
| Space group                            | P2 <sub>1</sub> 2 <sub>1</sub> 2 <sub>1</sub>                  |
| a/Å                                    | 10.726(2)                                                      |
| b/Å                                    | 12.5790(16)                                                    |
| c/Å                                    | 14.755(2)                                                      |
| $\alpha$ /°                            | 90                                                             |
| $\beta$ /°                             | 90                                                             |
| $\gamma$ /°                            | 90                                                             |
| Volume/Å <sup>3</sup>                  | 1990.9(6)                                                      |
| Z                                      | 4                                                              |
| $\rho_{\text{calc}}/\text{cm}^3$       | 1.186                                                          |
| $\mu/\text{mm}^{-1}$                   | 0.593                                                          |
| F(000)                                 | 752.0                                                          |
| Crystal size/mm <sup>3</sup>           | 0.42 × 0.36 × 0.29                                             |
| Radiation                              | CuK $\alpha$ ( $\lambda$ = 1.54178)                            |
| 2 $\theta$ range for data collection/° | 9.238 to 136.458                                               |
| Index ranges                           | -12 ≤ h ≤ 12, -14 ≤ k ≤ 15, -15 ≤ l ≤ 17                       |
| Reflections collected                  | 18353                                                          |
| Independent reflections                | 3644 [ $R_{\text{int}}$ = 0.0218, $R_{\text{sigma}}$ = 0.0163] |
| Data/restraints/parameters             | 3644/0/247                                                     |
| Goodness-of-fit on F <sup>2</sup>      | 1.070                                                          |



|                                                |                               |
|------------------------------------------------|-------------------------------|
| Final R indexes [ $I \geq 2\sigma(I)$ ]        | $R_1 = 0.0277, wR_2 = 0.0741$ |
| Final R indexes [all data]                     | $R_1 = 0.0279, wR_2 = 0.0744$ |
| Largest diff. peak/hole / $e \text{ \AA}^{-3}$ | 0.15/-0.15                    |
| Flack parameter                                | 0.00(5)                       |

**Table 2 Fractional Atomic Coordinates ( $\times 10^4$ ) and Equivalent Isotropic Displacement Parameters ( $\text{\AA}^2 \times 10^3$ ) for 3e.  $U_{\text{eq}}$  is defined as 1/3 of the trace of the orthogonalised  $U_{\text{H}}$  tensor.**

| Atom | <i>x</i>   | <i>y</i>   | <i>z</i>   | $U(\text{eq})$ |
|------|------------|------------|------------|----------------|
| O1   | 6748.2(15) | 371.3(11)  | 4907.3(9)  | 61.7(4)        |
| O2   | 1053.4(11) | 2285.3(10) | 3763.6(10) | 54.3(3)        |
| N1   | 1365.2(11) | 512.0(12)  | 3808.0(10) | 41.7(3)        |
| C1   | 6477.4(17) | 1582.7(14) | 667.6(12)  | 46.2(4)        |
| C2   | 5785(2)    | 2347.8(14) | 249.5(12)  | 51.2(5)        |
| C3   | 5078.9(19) | 3071.8(13) | 762.1(12)  | 46.3(4)        |
| C4   | 5076.5(15) | 3016.2(12) | 1688.9(11) | 37.0(3)        |
| C5   | 5762.8(13) | 2215.8(12) | 2148.1(10) | 31.8(3)        |
| C6   | 6471.1(14) | 1476.0(12) | 1626.3(11) | 36.4(3)        |
| C7   | 7096.5(14) | 628.6(13)  | 2070.8(12) | 40.7(4)        |
| C8   | 7006.7(14) | 504.8(12)  | 2981.9(12) | 39.7(4)        |
| C9   | 6319.4(14) | 1246.3(12) | 3516.7(11) | 34.7(3)        |
| C10  | 5729.3(13) | 2100.0(11) | 3114.6(10) | 30.6(3)        |
| C11  | 6263.3(17) | 1111.3(13) | 4507.0(12) | 43.2(4)        |
| C12  | 4975.2(13) | 2887.9(11) | 3644.9(10) | 31.9(3)        |
| C13  | 5408.6(14) | 3851.2(12) | 3893.0(10) | 33.9(3)        |
| C14  | 6653.4(14) | 4317.1(11) | 3778.1(10) | 33.5(3)        |
| C15  | 7772.5(15) | 3739.9(13) | 3792.2(12) | 40.1(3)        |
| C16  | 8910.1(16) | 4245.2(14) | 3691.6(13) | 46.6(4)        |
| C17  | 8967.8(16) | 5331.2(14) | 3564.6(11) | 45.5(4)        |
| C18  | 7876.3(17) | 5918.9(13) | 3544.6(12) | 45.5(4)        |
| C19  | 6738.3(15) | 5421.9(13) | 3666.7(11) | 39.6(4)        |
| C20  | 3668.2(14) | 2623.3(12) | 3804.1(10) | 34.8(3)        |
| C21  | 3140.8(13) | 1687.1(12) | 3628.4(10) | 34.9(3)        |
| C22  | 1777.3(14) | 1519.2(14) | 3745.9(11) | 39.1(3)        |
| C23  | 26.2(16)   | 303.9(19)  | 3781.1(14) | 58.3(5)        |
| C24  | 2179.3(18) | -411.3(15) | 3853.3(14) | 50.6(4)        |

**Table 3 Anisotropic Displacement Parameters ( $\text{\AA}^2 \times 10^3$ ) for 3e. The Anisotropic displacement factor exponent takes the form:  $-2\pi^2[h^2a^{*2}U_{11}+2hka^*b^*U_{12}+\dots]$ .**

| Atom | $U_{11}$ | $U_{22}$ | $U_{33}$ | $U_{23}$ | $U_{13}$ | $U_{12}$ |
|------|----------|----------|----------|----------|----------|----------|
| O1   | 78.9(10) | 47.8(7)  | 58.4(8)  | 10.0(6)  | -20.6(7) | 15.0(7)  |
| O2   | 35.3(6)  | 57.9(7)  | 69.7(8)  | -7.1(7)  | 2.6(6)   | 14.4(5)  |
| N1   | 31.8(6)  | 53.0(8)  | 40.2(7)  | 0.8(6)   | -0.2(6)  | -3.2(6)  |
| C1   | 47.3(9)  | 44.9(8)  | 46.4(9)  | -12.8(7) | 15.7(7)  | -7.9(8)  |
| C2   | 69.4(13) | 48.3(9)  | 36.1(9)  | -1.6(7)  | 11.2(8)  | -10.5(9) |
| C3   | 61.8(11) | 38.7(8)  | 38.5(8)  | 5.1(7)   | 0.6(8)   | -3.1(8)  |
| C4   | 39.9(8)  | 33.4(7)  | 37.6(8)  | -1.2(6)  | 3.4(6)   | 1.3(6)   |
| C5   | 28.4(7)  | 30.8(7)  | 36.2(8)  | -4.0(6)  | 3.6(6)   | -2.5(6)  |
| C6   | 29.4(7)  | 34.1(7)  | 45.7(8)  | -9.8(6)  | 6.8(6)   | -3.7(6)  |
| C7   | 26.6(7)  | 35.6(8)  | 59.9(10) | -15.2(7) | 4.0(7)   | 2.6(6)   |
| C8   | 27.8(7)  | 30.0(8)  | 61.1(10) | -6.4(7)  | -8.7(7)  | 3.9(6)   |
| C9   | 29.2(7)  | 30.1(7)  | 44.7(8)  | -2.5(6)  | -5.1(6)  | 1.8(6)   |
| C10  | 26.7(7)  | 28.6(7)  | 36.5(8)  | -3.9(6)  | -1.2(5)  | -0.7(6)  |
| C11  | 47.0(10) | 36.9(8)  | 45.8(9)  | 2.1(7)   | -11.2(7) | 3.6(7)   |
| C12  | 34.5(7)  | 32.3(7)  | 29.0(7)  | 0.9(6)   | -0.4(6)  | 6.5(6)   |
| C13  | 37.8(7)  | 33.3(7)  | 30.7(7)  | -1.8(6)  | 0.2(6)   | 7.8(6)   |
| C14  | 40.8(7)  | 32.7(7)  | 27.0(7)  | -3.3(6)  | -4.7(6)  | 3.6(6)   |
| C15  | 40.2(8)  | 35.7(8)  | 44.4(8)  | -1.7(7)  | -5.4(7)  | 3.7(6)   |
| C16  | 38.1(8)  | 49.0(9)  | 52.9(10) | -4.8(8)  | -6.8(8)  | 4.7(7)   |
| C17  | 42.2(8)  | 50.9(9)  | 43.4(9)  | -3.2(8)  | -5.9(7)  | -8.0(8)  |
| C18  | 53.0(10) | 36.4(8)  | 47.2(9)  | 0.0(7)   | -10.7(8) | -5.5(7)  |
| C19  | 43.3(8)  | 34.0(7)  | 41.6(8)  | -5.2(6)  | -8.3(7)  | 4.6(6)   |
| C20  | 35.2(7)  | 37.1(7)  | 32.1(7)  | -0.8(6)  | 3.4(6)   | 8.9(6)   |
| C21  | 30.7(7)  | 39.2(8)  | 34.7(7)  | -0.8(6)  | 2.0(6)   | 7.6(6)   |
| C22  | 31.5(7)  | 50.7(9)  | 35.2(7)  | -3.0(7)  | 2.1(6)   | 5.9(6)   |
| C23  | 36.2(9)  | 85.2(14) | 53.6(10) | -3.7(10) | 3.2(8)   | -14.3(9) |
| C24  | 50.2(9)  | 46.9(9)  | 54.6(10) | 5.3(8)   | -1.4(8)  | -2.5(8)  |

**Table 4 Bond Lengths for 3e.**

| Atom | Atom | Length/ $\text{\AA}$ | Atom | Atom | Length/ $\text{\AA}$ |
|------|------|----------------------|------|------|----------------------|
| O1   | C11  | 1.219(2)             | C9   | C10  | 1.381(2)             |
| O2   | C22  | 1.238(2)             | C9   | C11  | 1.472(2)             |
| N1   | C22  | 1.345(2)             | C10  | C12  | 1.500(2)             |
| N1   | C23  | 1.460(2)             | C12  | C13  | 1.349(2)             |
| N1   | C24  | 1.455(2)             | C12  | C20  | 1.460(2)             |

**Table 4 Bond Lengths for 3e.**

| Atom | Atom | Length/Å | Atom | Atom | Length/Å |
|------|------|----------|------|------|----------|
| C1   | C2   | 1.363(3) | C13  | C14  | 1.468(2) |
| C1   | C6   | 1.421(2) | C14  | C15  | 1.403(2) |
| C2   | C3   | 1.405(3) | C14  | C19  | 1.402(2) |
| C3   | C4   | 1.369(2) | C15  | C16  | 1.384(2) |
| C4   | C5   | 1.419(2) | C16  | C17  | 1.380(3) |
| C5   | C6   | 1.427(2) | C17  | C18  | 1.385(3) |
| C5   | C10  | 1.434(2) | C18  | C19  | 1.383(2) |
| C6   | C7   | 1.420(2) | C20  | C21  | 1.332(2) |
| C7   | C8   | 1.357(3) | C21  | C22  | 1.488(2) |
| C8   | C9   | 1.427(2) |      |      |          |

**Table 5 Bond Angles for 3e.**

| Atom | Atom | Atom | Angle/°    | Atom | Atom | Atom | Angle/°    |
|------|------|------|------------|------|------|------|------------|
| C22  | N1   | C23  | 119.35(16) | C9   | C10  | C12  | 122.49(13) |
| C22  | N1   | C24  | 123.91(14) | O1   | C11  | C9   | 123.47(17) |
| C24  | N1   | C23  | 116.65(16) | C13  | C12  | C10  | 123.34(13) |
| C2   | C1   | C6   | 120.96(16) | C13  | C12  | C20  | 119.49(13) |
| C1   | C2   | C3   | 120.50(16) | C20  | C12  | C10  | 116.82(13) |
| C4   | C3   | C2   | 120.36(17) | C12  | C13  | C14  | 129.86(13) |
| C3   | C4   | C5   | 120.79(15) | C15  | C14  | C13  | 124.75(13) |
| C4   | C5   | C6   | 118.77(14) | C19  | C14  | C13  | 117.92(13) |
| C4   | C5   | C10  | 122.26(13) | C19  | C14  | C15  | 117.32(15) |
| C6   | C5   | C10  | 118.93(14) | C16  | C15  | C14  | 121.01(15) |
| C1   | C6   | C5   | 118.56(16) | C17  | C16  | C15  | 120.57(16) |
| C7   | C6   | C1   | 121.90(15) | C16  | C17  | C18  | 119.55(16) |
| C7   | C6   | C5   | 119.46(15) | C19  | C18  | C17  | 120.13(15) |
| C8   | C7   | C6   | 120.68(14) | C18  | C19  | C14  | 121.37(15) |
| C7   | C8   | C9   | 120.64(15) | C21  | C20  | C12  | 125.32(13) |
| C8   | C9   | C11  | 119.65(14) | C20  | C21  | C22  | 121.36(14) |
| C10  | C9   | C8   | 120.51(15) | O2   | C22  | N1   | 121.72(15) |
| C10  | C9   | C11  | 119.83(14) | O2   | C22  | C21  | 120.57(16) |
| C5   | C10  | C12  | 117.73(13) | N1   | C22  | C21  | 117.70(14) |
| C9   | C10  | C5   | 119.67(13) |      |      |      |            |

**Table 6 Torsion Angles for 3e.**

| A   | B   | C   | D   | Angle/°     | A   | B   | C   | D   | Angle/°     |
|-----|-----|-----|-----|-------------|-----|-----|-----|-----|-------------|
| C1  | C2  | C3  | C4  | -0.1(3)     | C10 | C5  | C6  | C7  | 1.7(2)      |
| C1  | C6  | C7  | C8  | -175.56(16) | C10 | C9  | C11 | O1  | 179.07(16)  |
| C2  | C1  | C6  | C5  | -2.5(3)     | C10 | C12 | C13 | C14 | -4.5(2)     |
| C2  | C1  | C6  | C7  | 174.34(16)  | C10 | C12 | C20 | C21 | 9.7(2)      |
| C2  | C3  | C4  | C5  | -1.3(3)     | C11 | C9  | C10 | C5  | -178.62(14) |
| C3  | C4  | C5  | C6  | 0.8(2)      | C11 | C9  | C10 | C12 | -2.6(2)     |
| C3  | C4  | C5  | C10 | -176.68(16) | C12 | C13 | C14 | C15 | -32.6(2)    |
| C4  | C5  | C6  | C1  | 1.1(2)      | C12 | C13 | C14 | C19 | 148.92(16)  |
| C4  | C5  | C6  | C7  | -175.88(14) | C12 | C20 | C21 | C22 | -175.10(14) |
| C4  | C5  | C10 | C9  | 173.83(14)  | C13 | C12 | C20 | C21 | -176.84(15) |
| C4  | C5  | C10 | C12 | -2.4(2)     | C13 | C14 | C15 | C16 | -179.03(16) |
| C5  | C6  | C7  | C8  | 1.3(2)      | C13 | C14 | C19 | C18 | -179.28(14) |
| C5  | C10 | C12 | C13 | -83.36(18)  | C14 | C15 | C16 | C17 | -0.7(3)     |
| C5  | C10 | C12 | C20 | 89.81(16)   | C15 | C14 | C19 | C18 | 2.1(2)      |
| C6  | C1  | C2  | C3  | 2.1(3)      | C15 | C16 | C17 | C18 | 0.5(3)      |
| C6  | C5  | C10 | C9  | -3.7(2)     | C16 | C17 | C18 | C19 | 1.1(3)      |
| C6  | C5  | C10 | C12 | -179.88(13) | C17 | C18 | C19 | C14 | -2.4(2)     |
| C6  | C7  | C8  | C9  | -2.3(2)     | C19 | C14 | C15 | C16 | -0.6(2)     |
| C7  | C8  | C9  | C10 | 0.3(2)      | C20 | C12 | C13 | C14 | -177.51(14) |
| C7  | C8  | C9  | C11 | -178.36(15) | C20 | C21 | C22 | O2  | 20.1(2)     |
| C8  | C9  | C10 | C5  | 2.7(2)      | C20 | C21 | C22 | N1  | -161.57(15) |
| C8  | C9  | C10 | C12 | 178.74(13)  | C23 | N1  | C22 | O2  | 7.8(2)      |
| C8  | C9  | C11 | O1  | -2.3(3)     | C23 | N1  | C22 | C21 | -170.49(15) |
| C9  | C10 | C12 | C13 | 100.54(18)  | C24 | N1  | C22 | O2  | -175.61(17) |
| C9  | C10 | C12 | C20 | -86.29(17)  | C24 | N1  | C22 | C21 | 6.1(2)      |
| C10 | C5  | C6  | C1  | 178.65(14)  |     |     |     |     |             |

**Table 7 Hydrogen Atom Coordinates ( $\text{\AA} \times 10^4$ ) and Isotropic Displacement Parameters ( $\text{\AA}^2 \times 10^3$ ) for 3e.**

| Atom | x       | y       | z       | U(eq) |
|------|---------|---------|---------|-------|
| H1   | 6971.45 | 1114.01 | 312.76  | 55    |
| H2   | 5779.06 | 2391.77 | -393.18 | 61    |
| H3   | 4600.85 | 3602.8  | 464.03  | 56    |
| H4   | 4609.84 | 3519.43 | 2028.7  | 44    |
| H7   | 7582.74 | 143.3   | 1726.67 | 49    |
| H8   | 7405.17 | -81.23  | 3266.54 | 48    |

**Table 7 Hydrogen Atom Coordinates ( $\text{\AA}\times 10^4$ ) and Isotropic Displacement Parameters ( $\text{\AA}^2\times 10^3$ ) for 3e.**

| Atom | x       | y       | z       | U(eq) |
|------|---------|---------|---------|-------|
| H11  | 5826.12 | 1628.35 | 4852.37 | 52    |
| H13  | 4818.37 | 4296.27 | 4187.07 | 41    |
| H15  | 7748.95 | 2990.81 | 3871.97 | 48    |
| H16  | 9657.91 | 3841.05 | 3710.11 | 56    |
| H17  | 9751.02 | 5673.31 | 3491.3  | 55    |
| H18  | 7909.21 | 6664.85 | 3446.91 | 55    |
| H19  | 5998.96 | 5837.55 | 3675.25 | 48    |
| H20  | 3151.87 | 3162.75 | 4053.33 | 42    |
| H21  | 3645.56 | 1114.86 | 3423.74 | 42    |
| H23A | -424.44 | 976.38  | 3709.04 | 87    |
| H23B | -231.71 | -39.14  | 4347.13 | 87    |
| H23C | -163.8  | -165    | 3269.02 | 87    |
| H24A | 2394.97 | -639.81 | 3238.06 | 76    |
| H24B | 1749.72 | -990.59 | 4169.11 | 76    |
| H24C | 2941.59 | -225.49 | 4183.39 | 76    |

**Table 8 Solvent masks information for 3e.**

| Number | X      | Y     | Z     | Volume | Electron count | Content |
|--------|--------|-------|-------|--------|----------------|---------|
| 1      | -0.051 | 0.260 | 0.208 | 24     | 3              |         |
| 2      | 0.051  | 0.760 | 0.292 | 24     | 3              |         |
| 3      | 0.449  | 0.240 | 0.792 | 24     | 3              |         |
| 4      | 0.551  | 0.740 | 0.708 | 24     | 3              |         |
